# Supplementary material for: Dissecting Interferon-Induced Transcriptional Programs in Human Peripheral Blood Cells
Source: PLoS One. 2010 Mar 22;5(3):e9753. doi: 10.1371/journal.pone.0009753 (PMC2842296; doi:10.1371/journal.pone.0009753)
Supplement: Table S2 — PBMC cytokine activation profiles. The PBMC responses to stimulation with 0.6 pM IFNα, β, ω, and γ, IL12 and TNFα from 30 minutes to 24 h after treatment. Genes identified by SAM analysis (minimum 2 fold cutoff at a false discovery rate of <1% of the median) are identified for each cytokine compared to mock (0.1% BSA/PBS) treated PBMCs. The genes are partitioned into induced/repressed lists for each cytokine, together with mean fold expression ratios, and are ordered alphabetically using gene annotation from Source [70]. Data are summarized in Figure 1 and Table 1. (0.18 MB XLS) [file pone.0009753.s004.xls]

## Sheet: IFNa U
Table S2 (Waddell et al.)
Genes identified as significantly induced in IFNa treated PBMC vs Mock
Fold change minimum 2, SAM delta 0.80310, false discovery rate of median 0.98878%
226 genes
Function	Mean fold change
4E-T eIF4E-transporter | IMAGE:1671086	2.13258
ACK1 activated p21cdc42Hs kinase | IMAGE:1216323	2.56289
ADAR adenosine deaminase, RNA-specific | IMAGE:950367	2.17786
AIM2 absent in melanoma 2 | IMAGE:1370375	2.9815
AKAP2 A kinase (PRKA) anchor protein 2 | IMAGE:262695	4.56007
APOL3 apolipoprotein L, 3 | IMAGE:1584411	2.12966
ATF3 activating transcription factor 3 | IMAGE:428248	5.22363
ATF5 activating transcription factor 5 | IMAGE:1671185	2.19179
BAG1 BCL2-associated athanogene | IMAGE:1636251	2.02777
BARD1 BRCA1 associated RING domain 1 | IMAGE:430928	2.17043
BCL7B B-cell CLL/lymphoma 7B | IMAGE:682661	3.02926
BF B-factor, properdin | IMAGE:741977	9.58942
BLVRA biliverdin reductase A | IMAGE:627542	2.03916
BRCA1 breast cancer 1, early onset | IMAGE:1357413	5.21963
BRCA2 breast cancer 2, early onset | IMAGE:711698	2.19408
BRDG1 BCR downstream signaling 1 | IMAGE:1301195	2.53865
BST2 bone marrow stromal cell antigen 2 | IMAGE:811024	3.20536
BUB1 budding uninhibited by benzimidazoles 1 (yeast homolog) | IMAGE:1341540	2.00769
C2 complement component 2 | IMAGE:85497	2.3434
CACNA1A calcium channel, voltage-dependent, P/Q type, alpha 1A subunit | IMAGE:2060385	2.13369
CAD carbamoyl-phosphate synthetase 2, aspartate transcarbamylase, and dihydroorotase | IMAGE:589048	2.29297
CAMK2A calcium/calmodulin-dependent protein kinase (CaM kinase) II alpha | IMAGE:2163851	2.11008
CASP1 caspase 1, apoptosis-related cysteine protease (interleukin 1, beta, convertase) | IMAGE:1184337	2.1659
CASP10 caspase 10, apoptosis-related cysteine protease | IMAGE:1288007	2.5825
CASP5 caspase 5, apoptosis-related cysteine protease | IMAGE:341763	2.43538
CBR1 carbonyl reductase 1 | IMAGE:711552	2.62735
CCNA1 cyclin A1 | IMAGE:377799	3.8708
CCND2 cyclin D2 | IMAGE:366412	2.80567
CD2AP CD2-associated protein | IMAGE:1268642	2.39733
CD36L2 CD36 antigen (collagen type I receptor, thrombospondin receptor)-like 2 (lysosomal integral membrane protein II) | IMAGE:2018138	2.22776
CD38 CD38 antigen (p45) | IMAGE:123264	10.9186
CD4 CD4 antigen (p55) | LCP:60	2.14204
CD69 CD69 antigen (p60, early T-cell activation antigen) | IMAGE:1337219	4.29027
CDK4 cyclin-dependent kinase 4 | IMAGE:740079	2.57863
CDKN1A cyclin-dependent kinase inhibitor 1A (p21, Cip1) | IMAGE:2549557	2.16948
CH25H cholesterol 25-hydroxylase | IMAGE:1555741	2.25311
CHK choline kinase | IMAGE:1340602	2.28039
CNTN6 contactin 6 | IMAGE:257773	2.01735
COL3A1 collagen, type III, alpha 1 (Ehlers-Danlos syndrome type IV, autosomal dominant) | IMAGE:1334450	3.36688
COPEB core promoter element binding protein | IMAGE:2015885	2.03551
CTSL cathepsin L | IMAGE:345538	2.21054
CYP2J2 cytochrome P450, subfamily IIJ (arachidonic acid epoxygenase) polypeptide 2 | IMAGE:454580	3.82444
DAB2 disabled (Drosophila) homolog 2 (mitogen-responsive phosphoprotein) | IMAGE:137231	2.08105
DEFB1 defensin, beta 1 | IMAGE:2403485	9.54115
DJ742C19.2 phorbolin (similar to apolipoprotein B mRNA editing protein) | IMAGE:2418897	4.69283
DLL1 delta (Drosophila)-like 1 | IMAGE:30502	2.30101
DSC2 desmocollin 2 | IMAGE:2544966	2.86389
DUSP5 dual specificity phosphatase 5 | IMAGE:342378	2.83128
DUSP7 dual specificity phosphatase 7 | IMAGE:28140	2.64947
DYSF dysferlin, limb girdle muscular dystrophy 2B (autosomal recessive) | IMAGE:1914863	2.23044
E2-EPF ubiquitin carrier protein | IMAGE:810600	2.12418
ECE1 endothelin converting enzyme 1 | IMAGE:50882	2.18262
EDN1 endothelin 1 | IMAGE:47359	2.12749
EIF2B1 #eukaryotic translation initiation factor 2B, subunit 1 (alpha, 26kD) OR #Hs.189584 ESTs | IMAGE:209296	2.04857
ENPP2 ectonucleotide pyrophosphatase/phosphodiesterase 2 (autotaxin) | IMAGE:785351	2.52538
EPB41 erythrocyte membrane protein band 4.1 (elliptocytosis 1, RH-linked) | IMAGE:2410241	2.93218
ETV4 ets variant gene 4 (E1A enhancer-binding protein, E1AF) | IMAGE:430297	2.93336
F8 coagulation factor VIII, procoagulant component (hemophilia A) | IMAGE:2365540	3.33205
FACL2 fatty-acid-Coenzyme A ligase, long-chain 2 | IMAGE:2014138	2.62965
FAF1 Fas (TNFRSF6) associated factor 1 | IMAGE:39144	2.07273
FGF1 fibroblast growth factor 1 (acidic) | IMAGE:360478	2.53767
FLJ10217 oxysterol-binding protein-related protein 1 | IMAGE:284689	2.58831
FLNA filamin A, alpha (actin-binding protein-280) | IMAGE:796282	2.67216
FOXO1A forkhead box O1A (rhabdomyosarcoma) | IMAGE:1340213	2.17612
FT ferritin, light polypeptide | IMAGE:1671757	2.02388
FUT4 fucosyltransferase 4 (alpha (1,3) fucosyltransferase, myeloid-specific) | IMAGE:133213	2.87508
G1P3 interferon, alpha-inducible protein (clone IFI-6-16) | IMAGE:324912	2.76168
GADD45B growth arrest and DNA-damage-inducible, beta | IMAGE:1731860	2.40866
GBAP glucosidase, beta; acid, pseudogene | IMAGE:47665	2.08084
GBP1 guanylate binding protein 1, interferon-inducible, 67kD | IMAGE:712292	3.34144
GBP2 guanylate binding protein 2, interferon-inducible | IMAGE:298899	2.35508
GCH1 GTP cyclohydrolase 1 (dopa-responsive dystonia) | IMAGE:783849	4.57979
GCNT1 glucosaminyl (N-acetyl) transferase 1, core 2 (beta-1,6-N-acetylglucosaminyltransferase) | IMAGE:2244718	3.29049
GLB1 galactosidase, beta 1 | IMAGE:1493175	2.21649
GLS glutaminase | IMAGE:1272411	3.40667
GMPR guanosine monophosphate reductase | IMAGE:2063428	15.061
GS3686 #hypothetical protein, expressed in osteoblast OR FLJ22174 #hypothetical protein FLJ22174 | IMAGE:295939	7.66534
GUK1 guanylate kinase 1 | IMAGE:632681	2.17193
H2AFO H2A histone family, member O | IMAGE:488964	2.07638
HBG2 #hemoglobin, gamma G OR #Hs.173030 ESTs, Weakly similar to ALU8_HUMAN ALU SUBFAMILY SX SEQUENCE CONTAMINATION WARNING ENTRY [H.sapiens] | IMAGE:293078	2.17761
HLA-DNA major histocompatibility complex, class II, DN alpha | IMAGE:447509	2.16365
HLA-DRB5 major histocompatibility complex, class II, DR beta 5 | IMAGE:713065	2.00131
HM74 putative chemokine receptor; GTP-binding protein | IMAGE:1130777	2.56428
HS6ST heparan sulfate 6-O-sulfotransferase | IMAGE:969769	4.17585
HSPCA #heat shock 90kD protein 1, alpha OR #Hs.193411 ESTs, Weakly similar to T43481 probable mucin DKFZp434C196.1 [H.sapiens] | IMAGE:645259	2.1502
HSXIAPAF1 XIAP associated factor-1 | IMAGE:1663164	4.0026
HU-K5 lysophospholipase-like | IMAGE:347403	2.26597
Human pre-B cell enhancing factor (PBEF) mRNA, complete cds" | IMAGE:712604	2.13269
IFI16 interferon, gamma-inducible protein 16 | IMAGE:701332	2.55868
IFI27 interferon, alpha-inducible protein 27 | IMAGE:588915	18.944
IFI35 interferon-induced protein 35 | IMAGE:1422723	4.15946
IFI41 interferon-induced protein 41, 30kD | IMAGE:154493	3.18026
IFI75 interferon-induced protein 75, 52kD | IMAGE:79624	2.52279
IFIT1 interferon-induced protein with tetratricopeptide repeats 1 | IMAGE:2550047	22.8
IFITM1 interferon induced transmembrane protein 1 (9-27) | IMAGE:1271427	3.80866
IFITM2 interferon induced transmembrane protein 2 (1-8D) | IMAGE:1455976	4.56558
IFITM3 interferon induced transmembrane protein 3 (1-8U) | IMAGE:809910	4.8281
IFNG interferon, gamma | IMAGE:1579639	2.16381
IFRD1 interferon-related developmental regulator 1 | IMAGE:121948	2.05093
IFRG28 28kD interferon responsive protein | IMAGE:268385	7.8836
IGL@ immunoglobulin lambda locus | IMAGE:1240959	2.58584
IKBKG inhibitor of kappa light polypeptide gene enhancer in B-cells, kinase gamma | IMAGE:587627	2.15062
IL15 interleukin 15 | LCP:11	2.05692
IL15RA interleukin 15 receptor, alpha | IMAGE:470251	3.41302
IL1RN interleukin 1 receptor antagonist | IMAGE:84295	10.6636
IL6 interleukin 6 (interferon, beta 2) | LCP:79	3.02142
IL8RB interleukin 8 receptor, beta | IMAGE:882183	2.58995
INADL PDZ domain protein (Drosophila inaD-like) | IMAGE:206994	4.23537
INDO indoleamine-pyrrole 2,3 dioxygenase | IMAGE:740925	2.15607
INPPL1 inositol polyphosphate phosphatase-like 1 | IMAGE:686441	2.69473
IRF2 interferon regulatory factor 2 | IMAGE:727551	12.5884
IRF7 interferon regulatory factor 7 | IMAGE:1159963	3.6328
ISG15 interferon-stimulated protein, 15 kDa | IMAGE:149319	12.361
ISG20 #interferon stimulated gene (20kD) OR #Hs.293975 ESTs | IMAGE:815825	5.00067
ITIH2 inter-alpha (globulin) inhibitor, H2 polypeptide | IMAGE:126413	2.13198
JAK2 Janus kinase 2 (a protein tyrosine kinase) | IMAGE:2048524	2.78131
JUP junction plakoglobin | IMAGE:126320	2.04855
KCNA3 potassium voltage-gated channel, shaker-related subfamily, member 3 | IMAGE:1337856	2.19139
KDELR2 KDEL (Lys-Asp-Glu-Leu) endoplasmic reticulum protein retention receptor 2 | IMAGE:123117	2.07587
KPNB1 karyopherin (importin) beta 1 | IMAGE:1336400	2.02335
KRT8 keratin 8 | IMAGE:897781	3.07613
LAG3 lymphocyte-activation gene 3 | IMAGE:2163839	2.66417
LEPR leptin receptor | IMAGE:75475	2.20309
LGALS2 lectin, galactoside-binding, soluble, 2 (galectin 2) | IMAGE:1472743	6.17557
LGALS3BP lectin, galactoside-binding, soluble, 3 binding protein (galectin 6 binding protein) | IMAGE:811000	4.04396
LGALS9 lectin, galactoside-binding, soluble, 9 (galectin 9) | IMAGE:770192	2.12722
LMNB1 lamin B1 | IMAGE:1184257	2.52932
LMO2 LIM domain only 2 (rhombotin-like 1) | IMAGE:416474	2.23909
LOC51056 leucine aminopeptidase | IMAGE:141623	2.85557
LOC51667 NY-REN-18 antigen | IMAGE:259169	2.39037
LOC55871 COBW-like protein | IMAGE:412881	2.3542
LY6E lymphocyte antigen 6 complex, locus E | IMAGE:1470048	5.63694
MAP2K5 mitogen-activated protein kinase kinase 5 | IMAGE:343871	2.72276
MCL1 myeloid cell leukemia sequence 1 (BCL2-related) | IMAGE:145093	2.00493
MDS019 phorbolin-like protein MDS019 | IMAGE:1287889	2.1829
MIG monokine induced by gamma interferon | IMAGE:503617	3.22229
MMP16 matrix metalloproteinase 16 (membrane-inserted) | IMAGE:46916	2.07335
MNDA myeloid cell nuclear differentiation antigen | IMAGE:2010404	2.41567
MPHOSPH1 M-phase phosphoprotein 1 | IMAGE:1333695	3.04407
MRPS15 mitochondrial ribosomal protein S15 | IMAGE:346527	3.21449
MSE55 serum constituent protein | IMAGE:159462	2.03558
MSR1 macrophage scavenger receptor 1 | IMAGE:2354198	3.00773
MTAP44 interferon-induced, hepatitis C-associated microtubular aggregate protein (44kD) | IMAGE:1877205	5.76759
MX1 myxovirus (influenza) resistance 1, homolog of murine (interferon-inducible protein p78) | IMAGE:510152	7.9254
MX2 myxovirus (influenza) resistance 2, homolog of murine | IMAGE:471638	8.80458
MYD88 myeloid differentiation primary response gene (88) | IMAGE:489438	2.29934
NFE2L3 nuclear factor (erythroid-derived 2)-like 3 | IMAGE:345069	2.43347
NKTR natural killer-tumor recognition sequence | IMAGE:1319510	2.27582
NMI N-myc (and STAT) interactor | IMAGE:704532	3.02269
NR3C1 nuclear receptor subfamily 3, group C, member 1 | IMAGE:1269640	3.48041
OAS1 2',5'-oligoadenylate synthetase 1 (40-46 kD) | IMAGE:1303401	6.03532
OAS2 2'-5'-oligoadenylate synthetase 2 (69-71 kD) | IMAGE:155806	5.66453
OAS3 2'-5'-oligoadenylate synthetase 3 (100 kD) | IMAGE:2072763	14.5131
P8 p8 protein (candidate of metastasis 1) | IMAGE:80484	15.0749
PAF65B PCAF associated factor 65 beta | IMAGE:2027961	2.48957
PBEF pre-B-cell colony-enhancing factor | IMAGE:1270880	2.16298
PDGFB platelet-derived growth factor beta polypeptide (simian sarcoma viral (v-sis) oncogene homolog) | IMAGE:345645	2.42594
PDGFRL platelet-derived growth factor receptor-like | IMAGE:2349964	11.0566
PGGT1B protein geranylgeranyltransferase type I, beta subunit | IMAGE:1564510	2.09941
PKD2 protein kinase D2 | IMAGE:771215	2.29479
PLSCR1 phospholipid scramblase 1 | IMAGE:268736	3.46581
PMAIP1 phorbol-12-myristate-13-acetate-induced protein 1 | IMAGE:328550	2.86032
PML promyelocytic leukemia | IMAGE:705046	3.12038
PPARBP PPAR binding protein | IMAGE:1234933	2.84206
PRKR protein kinase, interferon-inducible double stranded RNA dependent | IMAGE:1249340	5.61657
PRKRA protein kinase, interferon-inducible double stranded RNA dependent activator | IMAGE:796132	2.19084
PRSC1 protease, cysteine, 1 (legumain) | IMAGE:760298	2.08319
PSMB9 proteasome (prosome, macropain) subunit, beta type, 9 (large multifunctional protease 2) | IMAGE:1337069	2.48817
PTCH patched (Drosophila) homolog | IMAGE:2020180	2.2751
RE2 G-protein coupled receptor | IMAGE:1743572	2.37789
RET ret proto-oncogene (multiple endocrine neoplasia and medullary thyroid carcinoma 1, Hirschsprung disease) | IMAGE:1516955	2.51351
RGS1 regulator of G-protein signalling 1 | IMAGE:361323	4.95223
RGS6 regulator of G-protein signalling 6 | IMAGE:24176	2.63262
RI58 retinoic acid- and interferon-inducible protein (58kD) | IMAGE:310105	4.923
RNF15 ring finger protein 15 | IMAGE:665373	2.18112
RNF21 ring finger protein 21, interferon-responsive | IMAGE:1305134	2.05376
RPS9 ribosomal protein S9 | IMAGE:1087015	2.40359
SAT spermidine/spermine N1-acetyltransferase | IMAGE:359835	2.21274
SCYA13 small inducible cytokine subfamily A (Cys-Cys), member 13 | IMAGE:80146	2.80521
SCYA7 small inducible cytokine A7 (monocyte chemotactic protein 3) | IMAGE:485989	3.75678
SCYA8 small inducible cytokine subfamily A (Cys-Cys), member 8 (monocyte chemotactic protein 2) | IMAGE:1911099	5.13258
SCYB10 small inducible cytokine subfamily B (Cys-X-Cys), member 10 | IMAGE:491243	5.45541
SCYB11 small inducible cytokine subfamily B (Cys-X-Cys), member 11 | IMAGE:1030351	40.1933
SERPINA8 serine (or cysteine) proteinase inhibitor, clade A (alpha-1 antiproteinase, antitrypsin), member 8 | IMAGE:210789	38.3448
SERPING1 serine (or cysteine) proteinase inhibitor, clade G (C1 inhibitor), member 1 | IMAGE:2541441	5.82302
SFRS10 splicing factor, arginine/serine-rich (transformer 2 Drosophila homolog) 10 | IMAGE:2121249	3.49065
SIAT9 sialyltransferase 9 (CMP-NeuAc:lactosylceramide alpha-2,3-sialyltransferase; GM3 synthase) | IMAGE:1722146	2.46043
SIT SHP2 interacting transmembrane adaptor | IMAGE:686379	2.26342
SLAM signaling lymphocytic activation molecule | IMAGE:814251	2.18094
SP100 #nuclear antigen Sp100 OR #Hs.88445 ESTs | IMAGE:686185	2.9765
SP140 nuclear body protein Sp140 | IMAGE:1372597	2.58676
SPIB Spi-B transcription factor (Spi-1/PU.1 related) | IMAGE:1350545	4.98883
SSA1 Sjogren syndrome antigen A1 (52kD, ribonucleoprotein autoantigen SS-A/Ro) | IMAGE:282956	2.32111
SSI-1 JAK binding protein | IMAGE:1319238	4.0862
STAF50 stimulated trans-acting factor (50 kDa) | IMAGE:1241157	2.84991
STAT1 signal transducer and activator of transcription 1, 91kD | IMAGE:1272694	2.7498
STAT2 signal transducer and activator of transcription 2, 113kD | IMAGE:1370850	3.00973
STX11 syntaxin 11 | IMAGE:683763	2.22777
SUPT3H suppressor of Ty (S.cerevisiae) 3 homolog | IMAGE:683517	4.34216
SYN2 synapsin II | IMAGE:2163448	2.05469
TAP1 transporter 1, ATP-binding cassette, sub-family B (MDR/TAP) | IMAGE:841340	2.37994
TAP2 transporter 2, ATP-binding cassette, sub-family B (MDR/TAP) | IMAGE:1354020	2.17401
TARBP1 TAR (HIV) RNA-binding protein 1 | IMAGE:2544957	4.00539
TCN2 transcobalamin II; macrocytic anemia | IMAGE:823864	2.68248
TCTEL1 t-complex-associated-testis-expressed 1-like 1 | IMAGE:1631194	3.40032
TFDP2 transcription factor Dp-2 (E2F dimerization partner 2) | IMAGE:685131	2.18903
TGM1 transglutaminase 1 (K polypeptide epidermal type I, protein-glutamine-gamma-glutamyltransferase) | IMAGE:2306445	7.5867
TLR3 toll-like receptor 3 | IMAGE:144675	3.51874
TLR7 toll-like receptor 7 | IMAGE:1309296	2.25524
TNFRSF11A tumor necrosis factor receptor superfamily, member 11a, activator of NFKB | IMAGE:346544	3.02267
TNFRSF6 tumor necrosis factor receptor superfamily, member 6 | IMAGE:1235120	3.14238
TNFSF10 tumor necrosis factor (ligand) superfamily, member 10 | IMAGE:1251947	8.78759
TNFSF6 tumor necrosis factor (ligand) superfamily, member 6 | LCP:38	2.34612
TOR1B torsin family 1, member B (torsin B) | IMAGE:486076	3.01623
TRD@ T cell receptor delta locus | IMAGE:343692	2.17958
TSC403 similar to lysosome-associated membrane glycoprotein | IMAGE:2239304	2.88605
UBE1L ubiquitin-activating enzyme E1-like | IMAGE:135479	2.28287
UBE2L6 ubiquitin-conjugating enzyme E2L 6 | IMAGE:2568695	3.0117
UBE3A ubiquitin protein ligase E3A (human papilloma virus E6-associated protein, Angelman syndrome) | IMAGE:2021679	2.16299
UNC93B unc93 (C.elegans) homolog B | IMAGE:1670734	2.44757
USP18 ubiquitin specific protease 18 | IMAGE:745083	13.5754
VAMP5 vesicle-associated membrane protein 5 (myobrevin) | IMAGE:2021870	2.02542
WARS tryptophanyl-tRNA synthetase | IMAGE:855786	2.10118
WT1 Wilms tumor 1 | IMAGE:594782	2.20246
XAP4 HBV associated factor | IMAGE:2495660	2.28679
ZNF173 zinc finger protein 173 | IMAGE:755176	2.0036

## Sheet: IFNa D
Genes identified as significantly repressed in IFNa treated PBMC vs Mock
Fold change minimum 2, SAM delta 0.80310, false discovery rate of median 0.98878%
31 genes
Gene Function	Mean fold change
APOC1 apolipoprotein C-I | IMAGE:1472689	0.39712
ASPH aspartate beta-hydroxylase | IMAGE:2310241	0.49147
BBC3 Bcl-2 binding component 3 | IMAGE:2326129	0.4694
CCR2 chemokine (C-C motif) receptor 2 | IMAGE:204539	0.46395
CCR8 chemokine (C-C motif) receptor 8 | IMAGE:1941548	0.44079
CD79B CD79B antigen (immunoglobulin-associated beta) | IMAGE:1241490	0.46934
CD9P-1 CD9 partner 1 | IMAGE:773469	0.49234
CDA cytidine deaminase | IMAGE:1552797	0.38678
CEBPA CCAAT/enhancer binding protein (C/EBP), alpha | IMAGE:2312250	0.49159
COL16A1 collagen, type XVI, alpha 1 | IMAGE:2511178	0.49251
CPVL serine carboxypeptidase vitellogenic-like | IMAGE:39833	0.47899
CTSF cathepsin F | IMAGE:2448778	0.48292
CYP11A cytochrome P450, subfamily XIA (cholesterol side chain cleavage) | IMAGE:785951	0.18619
FOLR2 folate receptor 2 (fetal) | IMAGE:813757	0.28384
FOLR3 folate receptor 3 (gamma) | IMAGE:324715	0.34444
FOS v-fos FBJ murine osteosarcoma viral oncogene homolog | IMAGE:26474	0.35934
GRO2 GRO2 oncogene | IMAGE:80971	0.36896
GRO3 GRO3 oncogene | IMAGE:1556433	0.32245
HGF hepatocyte growth factor (hepapoietin A; scatter factor) | IMAGE:1219612	0.41684
ITGAM integrin, alpha M (complement component receptor 3, alpha; also known as CD11b (p170), macrophage antigen alpha polypeptide) | IMAGE:1031175	0.48969
MAD4 Mad4 homolog | IMAGE:782578	0.41577
MGST2 microsomal glutathione S-transferase 2 | IMAGE:344432	0.49422
MRC1 mannose receptor, C type 1 | IMAGE:48886	0.32765
NRG1 neuregulin 1 | IMAGE:155716	0.44422
PHLDA1 pleckstrin homology-like domain, family A, member 1 | IMAGE:667883	0.39274
PLAU plasminogen activator, urokinase | IMAGE:1696513	0.48697
PTK7 PTK7 protein tyrosine kinase 7 | IMAGE:2367369	0.44038
SIT SHP2 interacting transmembrane adaptor | IMAGE:1333522	0.46126
SPARC secreted protein, acidic, cysteine-rich (osteonectin) | IMAGE:625016	0.43671
TAL2 T-cell acute lymphocytic leukemia 2 | IMAGE:1307938	0.48168
Z39IG Ig superfamily protein | IMAGE:41344	0.25668

## Sheet: IFNb U
Genes identified as significantly induced in IFNb treated PBMC vs Mock
Fold change minimum 2, SAM delta 0.86910, false discovery rate of median 0.68513%
370 genes
Gene Name	Mean fold change
4E-T eIF4E-transporter | IMAGE:1671086	3.08206
ACK1 activated p21cdc42Hs kinase | IMAGE:1216323	2.95433
ACLY ATP citrate lyase | IMAGE:1877676	2.93384
ADAM19 a disintegrin and metalloproteinase domain 19 (meltrin beta) | IMAGE:1340139	2.00054
ADAR adenosine deaminase, RNA-specific | IMAGE:950367	2.78901
ADM adrenomedullin | IMAGE:774446	2.13201
AIM2 absent in melanoma 2 | IMAGE:1370375	4.5535
AKAP10 A kinase (PRKA) anchor protein 10 | IMAGE:2029948	3.25084
AKAP2 A kinase (PRKA) anchor protein 2 | IMAGE:262695	5.02548
ALOX12 arachidonate 12-lipoxygenase | IMAGE:81434	2.10829
ALOX5 arachidonate 5-lipoxygenase | IMAGE:686021	2.0324
ANXA4 annexin A4 | IMAGE:755506	2.25801
APOL3 apolipoprotein L, 3 | IMAGE:1584411	3.13908
ATF3 activating transcription factor 3 | IMAGE:428248	6.31964
ATF5 activating transcription factor 5 | IMAGE:1671185	2.57749
ATM ataxia telangiectasia mutated (includes complementation groups A, C and D) | IMAGE:1289110	2.13721
B3GNT1 UDP-GlcNAc:betaGal beta-1,3-N-acetylglucosaminyltransferase 1 | IMAGE:149742	2.06562
BAG1 BCL2-associated athanogene | IMAGE:1636251	2.75852
BAK1 BCL2-antagonist/killer 1 | IMAGE:235938	2.05701
BARD1 BRCA1 associated RING domain 1 | IMAGE:430928	2.58355
BCL11A B-cell CLL/lymphoma 11A (zinc finger protein) | IMAGE:685680	2.0341
BCL7B B-cell CLL/lymphoma 7B | IMAGE:145700	2.68248
BF B-factor, properdin | IMAGE:741977	9.92028
BGN biglycan | IMAGE:144786	2.15853
BLVRA biliverdin reductase A | IMAGE:627542	2.57514
BLZF1 basic leucine zipper nuclear factor 1 (JEM-1) | IMAGE:23012	2.76178
BRCA1 breast cancer 1, early onset | IMAGE:1357413	5.80279
BRCA2 breast cancer 2, early onset | IMAGE:711698	2.30731
BRDG1 BCR downstream signaling 1 | IMAGE:1287810	3.04984
BST2 bone marrow stromal cell antigen 2 | IMAGE:811024	3.09438
BUB1 budding uninhibited by benzimidazoles 1 (yeast homolog) | IMAGE:1341540	2.039
C15ORF5 chromosome 15 open reading frame 5 | IMAGE:137356	2.18619
C3AR1 complement component 3a receptor 1 | IMAGE:2012135	2.45854
C6ORF32 chromosome 6 open reading frame 32 | IMAGE:1287750	2.06859
CACNA1A calcium channel, voltage-dependent, P/Q type, alpha 1A subunit | IMAGE:2060385	2.05211
CAD carbamoyl-phosphate synthetase 2, aspartate transcarbamylase, and dihydroorotase | IMAGE:589048	2.11481
CALD1 caldesmon 1 | IMAGE:813627	2.02564
CAMK2A calcium/calmodulin-dependent protein kinase (CaM kinase) II alpha | IMAGE:2163851	2.21323
CAPN2 calpain 2, (m/II) large subunit | IMAGE:549728	2.40119
CASP1 caspase 1, apoptosis-related cysteine protease (interleukin 1, beta, convertase) | IMAGE:1184337	2.92284
CASP10 caspase 10, apoptosis-related cysteine protease | IMAGE:1288007	3.38686
CASP5 caspase 5, apoptosis-related cysteine protease | IMAGE:341763	2.24751
CBR1 carbonyl reductase 1 | IMAGE:711552	3.07272
CCNA1 cyclin A1 | IMAGE:377799	4.07096
CCND2 cyclin D2 | IMAGE:366412	4.04171
CCR1 chemokine (C-C motif) receptor 1 | IMAGE:472008	2.14427
CCR5 chemokine (C-C motif) receptor 5 | IMAGE:701290	2.62233
CCRL2 chemokine (C-C motif) receptor-like 2 | IMAGE:1899192	2.2425
CD163 CD163 antigen | IMAGE:727292	2.15058
CD164 CD164 antigen, sialomucin | IMAGE:898198	2.22666
CD2AP CD2-associated protein | IMAGE:1268642	2.67229
CD36L2 CD36 antigen (collagen type I receptor, thrombospondin receptor)-like 2 (lysosomal integral membrane protein II) | IMAGE:2018138	3.08749
CD38 CD38 antigen (p45) | IMAGE:123264	14.4809
CD4 CD4 antigen (p55) | LCP:60	2.98385
CD59 CD59 antigen p18-20 (antigen identified by monoclonal antibodies 16.3A5, EJ16, EJ30, EL32 and G344) | IMAGE:471941	2.04916
CD69 CD69 antigen (p60, early T-cell activation antigen) | IMAGE:1337219	5.00359
CD72 CD72 antigen | IMAGE:1355900	2.00823
CD86 CD86 antigen (CD28 antigen ligand 2, B7-2 antigen) | IMAGE:1569006	2.11251
CDKN1A cyclin-dependent kinase inhibitor 1A (p21, Cip1) | IMAGE:2549557	2.32819
CENPA centromere protein A (17kD) | IMAGE:1337282	2.22772
CENPE #centromere protein E (312kD) OR #Hs.167652 ESTs, Highly similar to 1819485A CENP-E protein [H.sapiens] | IMAGE:243149	2.02069
CEP1 centrosomal protein 1 | IMAGE:1670752	2.18043
CFLAR CASP8 and FADD-like apoptosis regulator | IMAGE:309776	2.46867
CH25H cholesterol 25-hydroxylase | IMAGE:1555741	2.47607
CHI3L2 chitinase 3-like 2 | IMAGE:815214	2.19508
CHK choline kinase | IMAGE:1340602	2.84049
CISH cytokine inducible SH2-containing protein | IMAGE:724632	2.14289
CKB creatine kinase, brain | IMAGE:361728	2.07189
CMAH cytidine monophosphate-N-acetylneuraminic acid hydroxylase (CMP-N-acetylneuraminate monooxygenase) | IMAGE:257329	2.07126
CNTN6 contactin 6 | IMAGE:257773	2.19975
COL3A1 collagen, type III, alpha 1 (Ehlers-Danlos syndrome type IV, autosomal dominant) | IMAGE:1334450	3.92192
COPEB core promoter element binding protein | IMAGE:2015885	2.3847
COX17 COX17 (yeast) homolog, cytochrome c oxidase assembly protein | IMAGE:2468795	2.09683
CSF2RB colony stimulating factor 2 receptor, beta, low-affinity (granulocyte-macrophage) | IMAGE:704020	2.48093
CTSL cathepsin L | IMAGE:345538	2.35412
CYBB cytochrome b-245, beta polypeptide (chronic granulomatous disease) | IMAGE:825243	10.0338
CYP19 #cytochrome P450, subfamily XIX (aromatization of androgens) OR #Hs.141142 ESTs | IMAGE:149737	2.18726
CYP2J2 cytochrome P450, subfamily IIJ (arachidonic acid epoxygenase) polypeptide 2 | IMAGE:454580	2.80266
D13S106E highly charged protein | IMAGE:1367908	2.10561
DAB2 disabled (Drosophila) homolog 2 (mitogen-responsive phosphoprotein) | IMAGE:137231	2.29749
DEFA1 **defensin, alpha 1, myeloid-related sequence | IMAGE:247483	2.3385
DEFB1 defensin, beta 1 | IMAGE:2403485	10.7778
DHFR dihydrofolate reductase | IMAGE:123971	2.14166
DJ742C19.2 phorbolin (similar to apolipoprotein B mRNA editing protein) | IMAGE:2418897	5.21755
DLL1 delta (Drosophila)-like 1 | IMAGE:30502	2.7935
DMXL1 Dmx-like 1 | IMAGE:1335759	2.26047
DNMT1 DNA (cytosine-5-)-methyltransferase 1 | IMAGE:1320361	2.3866
DRAP1 DR1-associated protein 1 (negative cofactor 2 alpha) | IMAGE:754538	2.09535
DSC2 desmocollin 2 | IMAGE:2544966	3.12334
DUSP5 dual specificity phosphatase 5 | IMAGE:342378	3.2531
DUSP7 dual specificity phosphatase 7 | IMAGE:28140	3.17079
DYSF dysferlin, limb girdle muscular dystrophy 2B (autosomal recessive) | IMAGE:1914863	2.70635
E2-EPF ubiquitin carrier protein | IMAGE:810600	2.50574
E2F1 E2F transcription factor 1 | IMAGE:1318938	2.05579
ECE1 endothelin converting enzyme 1 | IMAGE:50882	2.69037
EDN1 endothelin 1 | IMAGE:47359	2.98206
EGR1 early growth response 1 | IMAGE:376370	2.40373
EIF2B1 #eukaryotic translation initiation factor 2B, subunit 1 (alpha, 26kD) OR #Hs.189584 ESTs | IMAGE:209296	2.46299
ELF1 E74-like factor 1 (ets domain transcription factor) | IMAGE:1317353	2.01005
ELF4 E74-like factor 4 (ets domain transcription factor) | IMAGE:682418	2.31521
EMR2 egf-like module containing, mucin-like, hormone receptor-like sequence 2 | IMAGE:2109400	2.20093
ENPP2 ectonucleotide pyrophosphatase/phosphodiesterase 2 (autotaxin) | IMAGE:785351	3.20333
EPB41 erythrocyte membrane protein band 4.1 (elliptocytosis 1, RH-linked) | IMAGE:2410241	3.12461
EPB72 erythrocyte membrane protein band 7.2 (stomatin) | IMAGE:138936	2.08235
ETV4 ets variant gene 4 (E1A enhancer-binding protein, E1AF) | IMAGE:430297	4.65406
ETV6 ets variant gene 6 (TEL oncogene) | IMAGE:1184132	2.02702
F8 coagulation factor VIII, procoagulant component (hemophilia A) | IMAGE:2365540	3.62768
FACL2 fatty-acid-Coenzyme A ligase, long-chain 2 | IMAGE:2014138	3.23829
FAF1 Fas (TNFRSF6) associated factor 1 | IMAGE:39144	3.06714
FBXW2 f-box and WD-40 domain protein 2 | IMAGE:1303601	2.30902
FCGR1A Fc fragment of IgG, high affinity Ia, receptor for (CD64) | IMAGE:470615	2.94405
FGF1 fibroblast growth factor 1 (acidic) | IMAGE:360478	3.38613
FLNA filamin A, alpha (actin-binding protein-280) | IMAGE:796282	2.42137
FMR1 fragile X mental retardation 1 | IMAGE:1233969	2.24411
FOXO1A forkhead box O1A (rhabdomyosarcoma) | IMAGE:1340213	2.14548
FPRL1 formyl peptide receptor-like 1 | IMAGE:146605	2.50899
FT ferritin, light polypeptide | IMAGE:1671757	2.36449
FUT4 fucosyltransferase 4 (alpha (1,3) fucosyltransferase, myeloid-specific) | IMAGE:133213	3.9775
G1P3 interferon, alpha-inducible protein (clone IFI-6-16) | IMAGE:782513	2.51498
GADD45B growth arrest and DNA-damage-inducible, beta | IMAGE:1731860	3.46206
GBAP glucosidase, beta; acid, pseudogene | IMAGE:47665	2.00144
GBP1 guanylate binding protein 1, interferon-inducible, 67kD | IMAGE:712292	3.92822
GBP2 guanylate binding protein 2, interferon-inducible | IMAGE:298899	2.62182
GCH1 GTP cyclohydrolase 1 (dopa-responsive dystonia) | IMAGE:783849	5.46271
GCNT1 glucosaminyl (N-acetyl) transferase 1, core 2 (beta-1,6-N-acetylglucosaminyltransferase) | IMAGE:2244718	5.45378
GLS glutaminase | IMAGE:1272411	3.47181
GMPR guanosine monophosphate reductase | IMAGE:2063428	18.6314
GNPI glucosamine-6-phosphate isomerase | IMAGE:207082	2.38911
GRO2 GRO2 oncogene | IMAGE:841361	2.28451
GUK1 guanylate kinase 1 | IMAGE:632681	2.09032
H2AFO H2A histone family, member O | IMAGE:488964	2.31399
HBG2 #hemoglobin, gamma G OR #Hs.173030 ESTs, Weakly similar to ALU8_HUMAN ALU SUBFAMILY SX SEQUENCE CONTAMINATION WARNING ENTRY [H.sapiens] | IMAGE:293078	2.30787
HHEX hematopoietically expressed homeobox | IMAGE:2357103	2.16117
HK2 hexokinase 2 | IMAGE:1637282	2.08447
HLA-DNA major histocompatibility complex, class II, DN alpha | IMAGE:447509	2.62342
HM74 putative chemokine receptor; GTP-binding protein | IMAGE:1130777	2.72559
HS6ST heparan sulfate 6-O-sulfotransferase | IMAGE:969769	4.14819
HSA272195 centaurin-alpha 2 protein | IMAGE:1185661	2.19037
HSPA1A heat shock 70kD protein 1A | IMAGE:1102543	2.5832
HSPA1L heat shock 70kD protein-like 1 | IMAGE:50615	2.01232
HSPCA #heat shock 90kD protein 1, alpha OR #Hs.193411 ESTs, Weakly similar to T43481 probable mucin DKFZp434C196.1 [H.sapiens] | IMAGE:645259	2.21626
HSXIAPAF1 XIAP associated factor-1 | IMAGE:1663164	4.53027
HU-K5 lysophospholipase-like | IMAGE:347403	3.01319
Human pre-B cell enhancing factor (PBEF) mRNA, complete cds" | IMAGE:712604	2.19903
IFI16 interferon, gamma-inducible protein 16 | IMAGE:701332	3.22233
IFI27 interferon, alpha-inducible protein 27 | IMAGE:588915	17.138
IFI35 interferon-induced protein 35 | IMAGE:1422723	4.4713
IFI41 interferon-induced protein 41, 30kD | IMAGE:154493	4.04143
IFI75 interferon-induced protein 75, 52kD | IMAGE:79624	2.9315
IFIT1 interferon-induced protein with tetratricopeptide repeats 1 | IMAGE:2550047	15.354
IFITM1 interferon induced transmembrane protein 1 (9-27) | IMAGE:1271427	4.27573
IFITM2 interferon induced transmembrane protein 2 (1-8D) | IMAGE:1455976	5.2345
IFITM3 interferon induced transmembrane protein 3 (1-8U) | IMAGE:809910	4.3551
IFNG interferon, gamma | LCP:54	2.06662
IFRD1 interferon-related developmental regulator 1 | IMAGE:121948	2.52455
IFRG28 28kD interferon responsive protein | IMAGE:268385	12.5994
IGJ immunoglobulin J polypeptide, linker protein for immunoglobulin alpha and mu polypeptides | IMAGE:117806	2.25537
IGL@ immunoglobulin lambda locus | IMAGE:1240959	3.54485
IKBKG inhibitor of kappa light polypeptide gene enhancer in B-cells, kinase gamma | IMAGE:587627	2.24231
IKKE IKK-related kinase epsilon; inducible IkappaB kinase | IMAGE:364448	2.13953
IL15 interleukin 15 | IMAGE:289606	3.09778
IL15RA interleukin 15 receptor, alpha | IMAGE:470251	3.07724
IL18BP interleukin 18 binding protein | IMAGE:449043	2.29507
IL18R1 interleukin 18 receptor 1 | IMAGE:755054	2.11507
IL1RN interleukin 1 receptor antagonist | IMAGE:84295	12.3069
IL6 interleukin 6 (interferon, beta 2) | LCP:79	2.5157
IL7 interleukin 7 | IMAGE:701422	2.15897
IL8RB interleukin 8 receptor, beta | IMAGE:882183	2.99737
ILT7 immunoglobulin-like transcript 7 | IMAGE:2075082	2.13472
INADL PDZ domain protein (Drosophila inaD-like) | IMAGE:206994	4.4471
INDO indoleamine-pyrrole 2,3 dioxygenase | IMAGE:740925	2.38823
INPP5D inositol polyphosphate-5-phosphatase, 145kD | IMAGE:684592	2.21719
INPPL1 inositol polyphosphate phosphatase-like 1 | IMAGE:686441	4.02083
IRF1 interferon regulatory factor 1 | IMAGE:1307246	2.15808
IRF2 interferon regulatory factor 2 | IMAGE:686605	7.50327
IRF4 interferon regulatory factor 4 | IMAGE:1671163	2.20737
IRF7 interferon regulatory factor 7 | IMAGE:1159963	3.25349
ISG15 interferon-stimulated protein, 15 kDa | IMAGE:149319	14.5641
ISG20 #interferon stimulated gene (20kD) OR #Hs.293975 ESTs | IMAGE:815825	5.69709
ISGF3G interferon-stimulated transcription factor 3, gamma (48kD) | IMAGE:724588	2.17305
ITGAL integrin, alpha L (antigen CD11A (p180), lymphocyte function-associated antigen 1; alpha polypeptide) | IMAGE:1338831	2.08085
ITGAX integrin, alpha X (antigen CD11C (p150), alpha polypeptide) | IMAGE:684777	2.35077
JAK2 Janus kinase 2 (a protein tyrosine kinase) | IMAGE:2048524	4.02827
JUP junction plakoglobin | IMAGE:126320	2.5099
KCNA3 potassium voltage-gated channel, shaker-related subfamily, member 3 | IMAGE:1337856	2.94672
KCNMB1 potassium large conductance calcium-activated channel, subfamily M, beta member 1 | IMAGE:470122	2.31079
KDELR2 KDEL (Lys-Asp-Glu-Leu) endoplasmic reticulum protein retention receptor 2 | IMAGE:123117	2.48078
KLF2 Kruppel-like factor 2 (lung) | IMAGE:1671816	2.12135
KPNB1 karyopherin (importin) beta 1 | IMAGE:1335146	2.16939
KRT8 keratin 8 | IMAGE:897781	2.85725
LAF4 lymphoid nuclear protein related to AF4 | IMAGE:684685	2.05084
LAG3 lymphocyte-activation gene 3 | IMAGE:2163839	3.12262
LANCL1 LanC (bacterial lantibiotic synthetase component C)-like 1 | IMAGE:42123	2.03917
LBR lamin B receptor | IMAGE:1370570	2.04843
LEPR leptin receptor | IMAGE:1696157	2.5295
LGALS2 lectin, galactoside-binding, soluble, 2 (galectin 2) | IMAGE:1472743	4.45887
LGALS3BP lectin, galactoside-binding, soluble, 3 binding protein (galectin 6 binding protein) | IMAGE:811000	4.76245
LGALS9 lectin, galactoside-binding, soluble, 9 (galectin 9) | IMAGE:770192	2.47267
LILRA1 leukocyte immunoglobulin-like receptor, subfamily A (with TM domain), member 1 | IMAGE:2032639	2.35817
LLT1 lectin-like NK cell receptor | IMAGE:469964	2.11541
LMNB1 lamin B1 | IMAGE:1184257	2.71303
LMO2 LIM domain only 2 (rhombotin-like 1) | IMAGE:416474	3.32682
LOC51056 leucine aminopeptidase | IMAGE:141623	3.46913
LOC51092 CGI-40 protein | IMAGE:838285	2.16467
LOC51667 NY-REN-18 antigen | IMAGE:259169	3.07719
LOC55871 COBW-like protein | IMAGE:412881	3.07288
LOC57130 CGI-152 protein | IMAGE:50460	2.06871
LTA lymphotoxin alpha (TNF superfamily, member 1) | LCP:75	2.52898
LTB4R leukotriene b4 receptor (chemokine receptor-like 1) | IMAGE:1303043	2.3136
LY6E lymphocyte antigen 6 complex, locus E | IMAGE:1470048	5.43468
LYN v-yes-1 Yamaguchi sarcoma viral related oncogene homolog | IMAGE:1670800	2.24989
MAC myristoylated alanine-rich protein kinase C substrate (MARCKS, 80K-L) | IMAGE:840865	2.80541
MAP2K5 mitogen-activated protein kinase kinase 5 | IMAGE:343871	2.84174
MAP3K8 mitogen-activated protein kinase kinase kinase 8 | IMAGE:1306402	2.05235
MASL1 MFH-amplified sequences with leucine-rich tandem repeats 1 | IMAGE:1250670	2.12225
MBNL muscleblind (Drosophila)-like | IMAGE:1308108	2.01781
MCL1 myeloid cell leukemia sequence 1 (BCL2-related) | IMAGE:145093	2.42068
MDS019 phorbolin-like protein MDS019 | IMAGE:1287889	2.58778
MEF2A MADS box transcription enhancer factor 2, polypeptide A (myocyte enhancer factor 2A) | IMAGE:713469	2.2073
MGC5363 hypothetical protein MGC5363 | IMAGE:286200	2.0124
MIG monokine induced by gamma interferon | IMAGE:503617	3.38079
MNDA myeloid cell nuclear differentiation antigen | IMAGE:2010404	2.84154
MPHOSPH1 M-phase phosphoprotein 1 | IMAGE:1333695	4.38142
MRPS15 mitochondrial ribosomal protein S15 | IMAGE:346527	6.04689
MS4A7 membrane-spanning 4-domains, subfamily A, member 7 | IMAGE:1184567	2.10776
MSR1 macrophage scavenger receptor 1 | IMAGE:1946722	3.11
MTAP44 interferon-induced, hepatitis C-associated microtubular aggregate protein (44kD) | IMAGE:1877205	10.0619
MX1 myxovirus (influenza) resistance 1, homolog of murine (interferon-inducible protein p78) | IMAGE:510152	13.6885
MX2 myxovirus (influenza) resistance 2, homolog of murine | IMAGE:471638	10.5334
MYD88 myeloid differentiation primary response gene (88) | IMAGE:489438	2.89748
NBS1 Nijmegen breakage syndrome 1 (nibrin) | IMAGE:261567	2.14161
NCF1 neutrophil cytosolic factor 1 (47kD, chronic granulomatous disease, autosomal 1) | IMAGE:1370776	2.01314
NCOA2 nuclear receptor coactivator 2 | IMAGE:810036	2.05867
NEBL nebulette | IMAGE:302188	2.06006
NET-7 transmembrane 4 superfamily member (tetraspan NET-7) | IMAGE:591157	2.13878
NFE2L3 nuclear factor (erythroid-derived 2)-like 3 | IMAGE:345069	2.70313
NKTR natural killer-tumor recognition sequence | IMAGE:1319510	2.54674
NMI N-myc (and STAT) interactor | IMAGE:704532	3.55383
NOTCH1 Notch (Drosophila) homolog 1 (translocation-associated) | IMAGE:28941	2.0658
NR3C1 nuclear receptor subfamily 3, group C, member 1 | IMAGE:1269640	4.52896
NR4A3 nuclear receptor subfamily 4, group A, member 3 | IMAGE:1184411	2.08053
OAS1 2',5'-oligoadenylate synthetase 1 (40-46 kD) | IMAGE:1303401	5.72981
OAS2 2'-5'-oligoadenylate synthetase 2 (69-71 kD) | IMAGE:155806	8.23651
OAS3 2'-5'-oligoadenylate synthetase 3 (100 kD) | IMAGE:2072763	18.2502
P8 p8 protein (candidate of metastasis 1) | IMAGE:80484	26.8358
PAX5 paired box gene 5 (B-cell lineage specific activator protein) | IMAGE:1308191	2.48486
PAX8 paired box gene 8 | IMAGE:742101	2.33943
PBEF pre-B-cell colony-enhancing factor | IMAGE:1270880	2.31024
PCTK2 PCTAIRE protein kinase 2 | IMAGE:1289872	2.16816
PDE4B phosphodiesterase 4B, cAMP-specific (dunce (Drosophila)-homolog phosphodiesterase E4) | IMAGE:788136	2.03868
PDGFB platelet-derived growth factor beta polypeptide (simian sarcoma viral (v-sis) oncogene homolog) | IMAGE:345645	2.98843
PDGFRL platelet-derived growth factor receptor-like | IMAGE:2349964	5.92455
PFKFB3 6-phosphofructo-2-kinase/fructose-2,6-biphosphatase 3 | IMAGE:1902764	2.00028
PFKP phosphofructokinase, platelet | IMAGE:950682	2.07621
PIM2 pim-2 oncogene | IMAGE:1469292	2.01793
PKD2 protein kinase D2 | IMAGE:771215	2.56907
PLECKSTRIN | IMAGE:823779	2.34105
PLSCR1 phospholipid scramblase 1 | IMAGE:268736	4.22743
PMAIP1 phorbol-12-myristate-13-acetate-induced protein 1 | IMAGE:328550	2.92554
PML promyelocytic leukemia | IMAGE:705046	3.78604
PMS2 postmeiotic segregation increased (S. cerevisiae) 2 | IMAGE:647825	2.05875
PPARBP PPAR binding protein | IMAGE:1234933	3.6345
PPP2R2A protein phosphatase 2 (formerly 2A), regulatory subunit B (PR 52), alpha isoform | IMAGE:150556	2.35083
PRKAG1 protein kinase, AMP-activated, gamma 1 non-catalytic subunit | IMAGE:1302297	2.90476
PRKR protein kinase, interferon-inducible double stranded RNA dependent | IMAGE:1249340	6.1575
PRKRA protein kinase, interferon-inducible double stranded RNA dependent activator | IMAGE:796132	2.06459
PRKX protein kinase, X-linked | IMAGE:1638550	2.02771
PRSC1 protease, cysteine, 1 (legumain) | IMAGE:760298	2.11803
PSMB8 proteasome (prosome, macropain) subunit, beta type, 8 (large multifunctional protease 7) | IMAGE:2066619	2.03459
PSMB9 proteasome (prosome, macropain) subunit, beta type, 9 (large multifunctional protease 2) | IMAGE:1240661	3.02308
PTCH patched (Drosophila) homolog | IMAGE:2020180	2.92434
PTGER2 prostaglandin E receptor 2 (subtype EP2), 53kD | IMAGE:1877120	2.51585
RALB v-ral simian leukemia viral oncogene homolog B (ras related; GTP binding protein) | IMAGE:2472305	2.23903
RASGRP1 RAS guanyl releasing protein 1 (calcium and DAG-regulated) | IMAGE:703637	2.00014
Rat rab-related GTP-binding protein mRNA, complete cds OR #Hs.88550 ESTs | IMAGE:703969	2.9665
RBBP6 retinoblastoma-binding protein 6 | IMAGE:1370863	2.3275
RE2 G-protein coupled receptor | IMAGE:1743572	2.4474
RERE arginine-glutamic acid dipeptide (RE) repeats | IMAGE:840062	2.34237
RGS1 regulator of G-protein signalling 1 | IMAGE:361323	6.83939
RGS6 regulator of G-protein signalling 6 | IMAGE:24176	3.45318
RI58 retinoic acid- and interferon-inducible protein (58kD) | IMAGE:310105	6.93187
RIN1 ras inhibitor | IMAGE:725308	2.52039
RIPK1 receptor (TNFRSF)-interacting serine-threonine kinase 1 | IMAGE:592125	2.07172
RIPK3 receptor-interacting serine-threonine kinase 3 | IMAGE:825850	2.36611
RNF15 ring finger protein 15 | IMAGE:665373	3.10953
RNF21 ring finger protein 21, interferon-responsive | IMAGE:1305134	2.33613
RPS6KA5 ribosomal protein S6 kinase, 90kD, polypeptide 5 | IMAGE:46705	2.24913
RPS9 ribosomal protein S9 | IMAGE:1087015	2.36975
RRBP1 ribosome binding protein 1 (dog 180kD homolog) | IMAGE:810509	2.05203
SAT spermidine/spermine N1-acetyltransferase | IMAGE:359835	2.46734
SCYA13 small inducible cytokine subfamily A (Cys-Cys), member 13 | IMAGE:80146	3.99148
SCYA3L1 small inducible cytokine A3-like 1 | IMAGE:153355	2.62586
SCYA4 small inducible cytokine A4 (homologous to mouse Mip-1b) | IMAGE:259552	2.08056
SCYA7 small inducible cytokine A7 (monocyte chemotactic protein 3) | IMAGE:485989	3.45026
SCYA8 small inducible cytokine subfamily A (Cys-Cys), member 8 (monocyte chemotactic protein 2) | IMAGE:1911099	6.27523
SCYB10 small inducible cytokine subfamily B (Cys-X-Cys), member 10 | IMAGE:491243	6.19625
SCYB11 small inducible cytokine subfamily B (Cys-X-Cys), member 11 | IMAGE:1030351	56.6167
SD serine dehydratase | IMAGE:85202	2.22859
SELL selectin L (lymphocyte adhesion molecule 1) | IMAGE:1184721	2.05057
SERPINA8 serine (or cysteine) proteinase inhibitor, clade A (alpha-1 antiproteinase, antitrypsin), member 8 | IMAGE:210789	48.3238
SERPIND1 serine (or cysteine) proteinase inhibitor, clade D (heparin cofactor), member 1 | IMAGE:85690	3.3951
SERPING1 serine (or cysteine) proteinase inhibitor, clade G (C1 inhibitor), member 1 | IMAGE:2541441	8.10843
SFRS10 splicing factor, arginine/serine-rich (transformer 2 Drosophila homolog) 10 | IMAGE:2121249	4.07758
SFTPB surfactant, pulmonary-associated protein B | IMAGE:1584551	2.26869
SIAT9 sialyltransferase 9 (CMP-NeuAc:lactosylceramide alpha-2,3-sialyltransferase; GM3 synthase) | IMAGE:1722146	3.08263
Similar to napsin B aspartic protease and kidney-derived aspartic protease-like protein (Mouse) | IMAGE:1355045	3.04838
SIT SHP2 interacting transmembrane adaptor | IMAGE:686379	3.09988
SLAM signaling lymphocytic activation molecule | IMAGE:814251	2.77095
SLP65 B cell linker protein | IMAGE:2409188	2.12708
SMOH smoothened (Drosophila) homolog | IMAGE:530958	2.23862
SNX2 sorting nexin 2 | IMAGE:610113	2.3031
SOS1 son of sevenless (Drosophila) homolog 1 | IMAGE:1283779	2.26308
SP100 #nuclear antigen Sp100 OR #Hs.88445 ESTs | IMAGE:686185	3.995
SP140 nuclear body protein Sp140 | IMAGE:1372597	3.51753
SPIB Spi-B transcription factor (Spi-1/PU.1 related) | IMAGE:1350545	6.85541
SPTA1 spectrin, alpha, erythrocytic 1 (elliptocytosis 2) | IMAGE:449975	2.13356
SPTLC2 serine palmitoyltransferase, long chain base subunit 2 | IMAGE:592801	2.00378
SRM300 RNA binding protein; AT-rich element binding factor | IMAGE:489453	2.71404
SSA1 Sjogren syndrome antigen A1 (52kD, ribonucleoprotein autoantigen SS-A/Ro) | IMAGE:282956	2.73055
SSB Sjogren syndrome antigen B (autoantigen La) | IMAGE:49970	2.01921
SSI-1 JAK binding protein | IMAGE:1319238	4.5431
STAF50 stimulated trans-acting factor (50 kDa) | IMAGE:1241157	3.98274
STAT1 signal transducer and activator of transcription 1, 91kD | IMAGE:1272694	3.2858
STAT2 signal transducer and activator of transcription 2, 113kD | IMAGE:1370850	3.61435
STK2 serine/threonine kinase 2 | IMAGE:647050	2.0202
STX11 syntaxin 11 | IMAGE:1283795	2.56651
SUPT3H suppressor of Ty (S.cerevisiae) 3 homolog | IMAGE:683517	4.82285
TANK TRAF family member-associated NFKB activator | IMAGE:502486	2.03383
TAP1 transporter 1, ATP-binding cassette, sub-family B (MDR/TAP) | IMAGE:841340	2.80201
TAP2 transporter 2, ATP-binding cassette, sub-family B (MDR/TAP) | IMAGE:1354020	3.0113
TAPBP TAP binding protein (tapasin) | IMAGE:82903	2.07779
TARBP1 TAR (HIV) RNA-binding protein 1 | IMAGE:2544957	5.45617
TBX21 T-box 21 | IMAGE:2073364	2.88086
TCN2 transcobalamin II; macrocytic anemia | IMAGE:823864	2.94536
TCTEL1 t-complex-associated-testis-expressed 1-like 1 | IMAGE:1631194	4.1792
TFDP2 transcription factor Dp-2 (E2F dimerization partner 2) | IMAGE:685131	2.57295
TFF1 trefoil factor 1 (breast cancer, estrogen-inducible sequence expressed in) | IMAGE:2223790	2.55753
TGM1 transglutaminase 1 (K polypeptide epidermal type I, protein-glutamine-gamma-glutamyltransferase) | IMAGE:2306445	5.8513
THY1 Thy-1 cell surface antigen | IMAGE:382714	2.26942
TLR1 toll-like receptor 1 | IMAGE:1286374	2.16467
TLR3 toll-like receptor 3 | IMAGE:144675	4.82008
TLR7 toll-like receptor 7 | IMAGE:1309296	2.78255
TNFAIP2 tumor necrosis factor, alpha-induced protein 2 | IMAGE:810444	2.31971
TNFRSF11A tumor necrosis factor receptor superfamily, member 11a, activator of NFKB | IMAGE:346544	4.91055
TNFRSF6 tumor necrosis factor receptor superfamily, member 6 | IMAGE:1235120	4.56443
TNFSF10 tumor necrosis factor (ligand) superfamily, member 10 | IMAGE:1251947	12.1461
TNFSF6 tumor necrosis factor (ligand) superfamily, member 6 | LCP:38	3.29567
TOR1B torsin family 1, member B (torsin B) | IMAGE:486076	3.78373
TOSO regulator of Fas-induced apoptosis | IMAGE:1353883	2.07041
TRD@ T cell receptor delta locus | IMAGE:343692	2.76546
TRG@ T cell receptor gamma locus | IMAGE:1071266	2.09483
TSC403 similar to lysosome-associated membrane glycoprotein | IMAGE:2239304	4.20337
TXK TXK tyrosine kinase | IMAGE:148421	2.03528
UBE1L ubiquitin-activating enzyme E1-like | IMAGE:135479	3.05553
UBE2L6 ubiquitin-conjugating enzyme E2L 6 | IMAGE:2568695	4.23117
UBE3A ubiquitin protein ligase E3A (human papilloma virus E6-associated protein, Angelman syndrome) | IMAGE:2021679	2.24876
UBQLN2 ubiquilin 2 | IMAGE:288997	2.0254
UNC93B unc93 (C.elegans) homolog B | IMAGE:1670734	2.91431
USP15 ubiquitin specific protease 15 | IMAGE:669367	2.15525
USP18 ubiquitin specific protease 18 | IMAGE:745083	15.0573
USP25 ubiquitin specific protease 25 | IMAGE:754333	2.21595
UVRAG UV radiation resistance associated gene | IMAGE:1305064	2.1149
VAMP5 vesicle-associated membrane protein 5 (myobrevin) | IMAGE:2021678	2.19787
WARS tryptophanyl-tRNA synthetase | IMAGE:1647972	2.48303
WASPIP Wiskott-Aldrich syndrome protein interacting protein | IMAGE:1301540	2.50863
WT1 Wilms tumor 1 | IMAGE:594782	2.75602
XAP4 HBV associated factor | IMAGE:2495660	2.73531
ZFD25 zinc finger protein (ZFD25) | IMAGE:703844	2.17216
ZNF173 zinc finger protein 173 | IMAGE:755176	2.30136
ZNF313 zinc finger protein 313 | IMAGE:487165	2.04131

## Sheet: IFNb D
Genes identified as significantly repressed in IFNb treated PBMC vs Mock
Fold change minimum 2, SAM delta 0.86910, false discovery rate of median 0.68513%
114 genes
Gene Name	Mean fold change
A2M alpha-2-macroglobulin | IMAGE:44180	0.47165
AGR2 anterior gradient 2 (Xenepus laevis) homolog | IMAGE:2321113	0.4613
ANK2 ankyrin 2, neuronal | IMAGE:49354	0.41311
APOC1 apolipoprotein C-I | IMAGE:1472689	0.159
APOC2 apolipoprotein C-II | IMAGE:809523	0.49292
APOE apolipoprotein E | IMAGE:83995	0.42814
ARPC2 actin related protein 2/3 complex, subunit 2 (34 kD) | IMAGE:1334980	0.49196
ASGR1 asialoglycoprotein receptor 1 | IMAGE:204541	0.48492
ASGR2 asialoglycoprotein receptor 2 | IMAGE:206795	0.36891
ASPH aspartate beta-hydroxylase | IMAGE:2310241	0.49694
BBC3 Bcl-2 binding component 3 | IMAGE:2326129	0.35843
CASP10 caspase 10, apoptosis-related cysteine protease | IMAGE:686903	0.44304
CCNB2 cyclin B2 | IMAGE:856289	0.43511
CCR2 chemokine (C-C motif) receptor 2 | IMAGE:204539	0.4858
CCR6 chemokine (C-C motif) receptor 6 | IMAGE:247281	0.36512
CCR8 chemokine (C-C motif) receptor 8 | IMAGE:1941548	0.32194
CDA cytidine deaminase | IMAGE:1552797	0.32302
CDKN2C cyclin-dependent kinase inhibitor 2C (p18, inhibits CDK4) | IMAGE:752719	0.45568
CEBPA CCAAT/enhancer binding protein (C/EBP), alpha | IMAGE:2312250	0.468035
CGA glycoprotein hormones, alpha polypeptide | IMAGE:454908	0.48751
COL15A1 collagen, type XV, alpha 1 | IMAGE:809901	0.34111
COL16A1 collagen, type XVI, alpha 1 | IMAGE:2511178	0.42242
COL4A5 collagen, type IV, alpha 5 (Alport syndrome) | IMAGE:470001	0.45762
CXCR4 chemokine (C-X-C motif), receptor 4 (fusin) | IMAGE:1272736	0.49977
CYBA cytochrome b-245, alpha polypeptide | IMAGE:1301279	0.48211
CYP11A cytochrome P450, subfamily XIA (cholesterol side chain cleavage) | IMAGE:785951	0.13094
CYP24 cytochrome P450, subfamily XXIV (vitamin D 24-hydroxylase) | IMAGE:266146	0.46374
CYP4F3 cytochrome P450, subfamily IVF, polypeptide 3 (leukotriene B4 omega hydroxylase) | IMAGE:2462163	0.36287
DDAH1 dimethylarginine dimethylaminohydrolase 1 | IMAGE:269300	0.36934
DDEF2 development and differentiation enhancing factor 2 | IMAGE:298128	0.41776
DKK1 dickkopf (Xenopus laevis) homolog 1 | IMAGE:501425	0.34756
DUSP1 dual specificity phosphatase 1 | IMAGE:133909	0.46941
EMAPL echinoderm microtubule-associated protein-like | IMAGE:784360	0.49295
ESM1 endothelial cell-specific molecule 1 | IMAGE:324122	0.47411
FABP3 fatty acid binding protein 3, muscle and heart (mammary-derived growth inhibitor) | IMAGE:486394	0.453
FBP1 fructose-1,6-bisphosphatase 1 | IMAGE:433253	0.49206
FLJ12894 nuclear receptor co-repressor/HDAC3 complex subunit | IMAGE:503851	0.4692
FLJ23462 duodenal cytochrome b | IMAGE:838446	0.49587
FOLR2 folate receptor 2 (fetal) | IMAGE:813757	0.3115
FOLR3 folate receptor 3 (gamma) | IMAGE:324715	0.32021
FOS v-fos FBJ murine osteosarcoma viral oncogene homolog | IMAGE:26474	0.38354
FRAT2 GSK-3 binding protein FRAT2 | IMAGE:2117149	0.37403
FSTL1 follistatin-like 1 | IMAGE:2569190	0.48013
FTL ferritin, light polypeptide | IMAGE:1670861	0.43793
FZD7 frizzled (Drosophila) homolog 7 | IMAGE:1087557	0.36724
GAL galanin | IMAGE:2237353	0.49124
GLG1 Golgi apparatus protein 1 | IMAGE:511387	0.49022
GPNMB glycoprotein (transmembrane) nmb | IMAGE:345616	0.49054
GPX2 glutathione peroxidase 2 (gastrointestinal) | IMAGE:587847	0.49909
GRO1 GRO1 oncogene (melanoma growth stimulating activity, alpha) | IMAGE:324437	0.44628
GRO2 GRO2 oncogene | IMAGE:323238	0.451395
GRO3 GRO3 oncogene | IMAGE:1556433	0.27395
H4FG H4 histone family, member G | IMAGE:1461138	0.32479
HBG2 hemoglobin, gamma G | IMAGE:1715851	0.482
HGF hepatocyte growth factor (hepapoietin A; scatter factor) | IMAGE:1219612	0.43149
HIRA HIR (histone cell cycle regulation defective, S. cerevisiae) homolog A | IMAGE:52327	0.4267
HMMR hyaluronan-mediated motility receptor (RHAMM) | IMAGE:787954	0.49097
HOXB5 homeo box B5 | IMAGE:150702	0.46734
ID3 inhibitor of DNA binding 3, dominant negative helix-loop-helix protein | IMAGE:756405	0.43643
IGSF1 immunoglobulin superfamily, member 1 | IMAGE:462007	0.46736
IL8 interleukin 8 | IMAGE:328692	0.340665
KCNH2 potassium voltage-gated channel, subfamily H (eag-related), member 2 | IMAGE:1671868	0.47395
KCNS3 potassium voltage-gated channel, delayed-rectifier, subfamily S, member 3 | IMAGE:2138030	0.39437
KHK ketohexokinase (fructokinase) | IMAGE:77897	0.46588
KIAA0439 homolog of yeast ubiquitin-protein ligase Rsp5; potential epithelial sodium channel regulator | IMAGE:811766	0.4832
LAIR2 leukocyte-associated Ig-like receptor 2 | IMAGE:502243	0.48315
LOC51304 DHHC1 protein | IMAGE:66574	0.46291
LOX lysyl oxidase | IMAGE:306812	0.42654
MAD4 Mad4 homolog | IMAGE:782578	0.48455
MKI67 antigen identified by monoclonal antibody Ki-67 | LCP:100	0.47869
MLANA melan-A | IMAGE:266361	0.36485
MME membrane metallo-endopeptidase (neutral endopeptidase, enkephalinase, CALLA, CD10) | IMAGE:701606	0.48836
MMP3 matrix metalloproteinase 3 (stromelysin 1, progelatinase) | IMAGE:324492	0.49923
MRC1 mannose receptor, C type 1 | IMAGE:48886	0.24486
MT1G metallothionein 1G | IMAGE:202535	0.49108
NEFL #neurofilament, light polypeptide (68kD) OR DKFZp434B0417 #hypothetical protein | IMAGE:28422	0.46646
NGFB nerve growth factor, beta polypeptide | IMAGE:72869	0.42556
NRG1 neuregulin 1 | IMAGE:155716	0.47783
P125 #Sec23-interacting protein p125 OR #Hs.9634 ESTs, Highly similar to C10_HUMAN PUTATIVE C10 PROTEIN [H.sapiens] | IMAGE:701694	0.49123
PHLDA1 pleckstrin homology-like domain, family A, member 1 | IMAGE:667883	0.34548
PIP5K1A phosphatidylinositol-4-phosphate 5-kinase, type I, alpha | IMAGE:1351514	0.4645
PLAU plasminogen activator, urokinase | IMAGE:1696513	0.452565
PPAP2B phosphatidic acid phosphatase type 2B | IMAGE:489201	0.409485
PTK7 PTK7 protein tyrosine kinase 7 | IMAGE:2367369	0.3664
PVALB parvalbumin | IMAGE:430318	0.4512
RARG retinoic acid receptor, gamma | IMAGE:797060	0.49904
RPS27 ribosomal protein S27 (metallopanstimulin 1) | IMAGE:2467016	0.48554
RPS29 ribosomal protein S29 | IMAGE:324144	0.49025
S100A3 S100 calcium-binding protein A3 | IMAGE:377441	0.49653
SEC13L sec13-like protein | IMAGE:757210	0.23992
SERPINF1 serine (or cysteine) proteinase inhibitor, clade F (alpha-2 antiplasmin, pigment epithelium derived factor), member 1 | IMAGE:2562939	0.41824
SGK serum/glucocorticoid regulated kinase | IMAGE:1288868	0.49928
SILV silver (mouse homolog) like | IMAGE:291448	0.48223
SLC9A3R2 solute carrier family 9 (sodium/hydrogen exchanger), isoform 3 regulatory factor 2 | IMAGE:155467	0.45736
SOX4 SRY (sex determining region Y)-box 4 | IMAGE:366815	0.47716
SPARC secreted protein, acidic, cysteine-rich (osteonectin) | IMAGE:250654	0.373737
SPOCK sparc/osteonectin, cwcv and kazal-like domains proteoglycan (testican) | IMAGE:754358	0.37259
SRPX sushi-repeat-containing protein, X chromosome | IMAGE:785933	0.46445
STC1 stanniocalcin 1 | IMAGE:547247	0.44658
SVIL supervillin | IMAGE:754018	0.47119
SYNGR1 synaptogyrin 1 | IMAGE:429466	0.45334
TBCC tubulin-specific chaperone c | IMAGE:328783	0.34955
TFRC transferrin receptor (p90, CD71) | IMAGE:841703	0.42161
TIMP3 tissue inhibitor of metalloproteinase 3 (Sorsby fundus dystrophy, pseudoinflammatory) | IMAGE:489519	0.49838
TM4SF2 transmembrane 4 superfamily member 2 | IMAGE:307471	0.40044
TM4SF7 transmembrane 4 superfamily member 7 | IMAGE:490556	0.44719
TNFRSF11B tumor necrosis factor receptor superfamily, member 11b (osteoprotegerin) | IMAGE:665356	0.47983
TP63 tumor protein 63 kDa with strong homology to p53 | IMAGE:345708	0.37951
TRIP10 thyroid hormone receptor interactor 10 | LCP:170	0.42159
TTK TTK protein kinase | IMAGE:1284490	0.48731
TYR tyrosinase (oculocutaneous albinism IA) | IMAGE:1845885	0.47988
TYRP1 tyrosinase-related protein 1 | IMAGE:665681	0.47968
UGT2B7 UDP glycosyltransferase 2 family, polypeptide B7 | IMAGE:1324438	0.41784
Z39IG Ig superfamily protein | IMAGE:41344	0.26916

## Sheet: IFNo U
Genes identified as significantly induced in IFNo treated PBMC vs Mock
Fold change minimum 2, SAM delta 0.91140, false discovery rate of median 0.70717%
288 genes
Gene Name	Mean fold change
4E-T eIF4E-transporter | IMAGE:1671086	2.76276
ABCB10 ATP-binding cassette, sub-family B (MDR/TAP), member 10 | IMAGE:770890	2.16453
ACK1 activated p21cdc42Hs kinase | IMAGE:1216323	2.69188
ACLY ATP citrate lyase | IMAGE:1877676	2.6228
ADAR adenosine deaminase, RNA-specific | IMAGE:950367	2.19485
ADM adrenomedullin | IMAGE:774446	2.0818
AIM2 absent in melanoma 2 | IMAGE:1370375	3.33226
AKAP10 A kinase (PRKA) anchor protein 10 | IMAGE:2029948	2.93541
AKAP2 A kinase (PRKA) anchor protein 2 | IMAGE:262695	4.43461
ALOX12 arachidonate 12-lipoxygenase | IMAGE:81434	2.61357
ANXA4 annexin A4 | IMAGE:755506	2.01105
APOL3 apolipoprotein L, 3 | IMAGE:1584411	2.8201
ATF3 activating transcription factor 3 | IMAGE:428248	5.40404
ATF5 activating transcription factor 5 | IMAGE:1671185	2.2485
ATM ataxia telangiectasia mutated (includes complementation groups A, C and D) | IMAGE:1289110	2.18361
B3GNT1 UDP-GlcNAc:betaGal beta-1,3-N-acetylglucosaminyltransferase 1 | IMAGE:149742	2.12003
BAG1 BCL2-associated athanogene | IMAGE:1636251	2.23802
BARD1 BRCA1 associated RING domain 1 | IMAGE:430928	2.47143
BCL11A B-cell CLL/lymphoma 11A (zinc finger protein) | IMAGE:1339205	2.01798
BCL7B B-cell CLL/lymphoma 7B | IMAGE:145700	2.48992
BF B-factor, properdin | IMAGE:741977	7.381
BLVRA biliverdin reductase A | IMAGE:627542	2.27738
BLZF1 basic leucine zipper nuclear factor 1 (JEM-1) | IMAGE:23012	2.1004
BRCA1 breast cancer 1, early onset | IMAGE:1357413	5.27382
BRCA2 breast cancer 2, early onset | IMAGE:711698	2.178
BRD4 #bromodomain-containing 4 OR #Hs.213814 ESTs, Highly similar to BRD4_HUMAN BROMODOMAIN-CONTAINING PROTEIN 4 (HUNK1 PROTEIN) [H.sapiens] | IMAGE:267713	2.11644
BRDG1 BCR downstream signaling 1 | IMAGE:1287810	2.12538
BST2 bone marrow stromal cell antigen 2 | IMAGE:811024	3.78629
C15ORF5 chromosome 15 open reading frame 5 | IMAGE:137356	2.17868
C3AR1 complement component 3a receptor 1 | IMAGE:810242	2.01261
CAD carbamoyl-phosphate synthetase 2, aspartate transcarbamylase, and dihydroorotase | IMAGE:589048	2.1723
CALD1 caldesmon 1 | IMAGE:813627	2.00981
CAMK2A calcium/calmodulin-dependent protein kinase (CaM kinase) II alpha | IMAGE:2163851	2.03067
CAPN2 calpain 2, (m/II) large subunit | IMAGE:549728	2.12133
CASK calcium/calmodulin-dependent serine protein kinase (MAGUK family) | IMAGE:2325916	2.38463
CASP1 caspase 1, apoptosis-related cysteine protease (interleukin 1, beta, convertase) | IMAGE:1184337	2.71923
CASP10 caspase 10, apoptosis-related cysteine protease | IMAGE:1288007	3.03312
CASP5 caspase 5, apoptosis-related cysteine protease | IMAGE:341763	2.28553
CBR1 carbonyl reductase 1 | IMAGE:711552	2.32842
CCNA1 cyclin A1 | IMAGE:377799	3.73568
CCND2 cyclin D2 | IMAGE:366412	3.05446
CCR1 chemokine (C-C motif) receptor 1 | IMAGE:472008	2.40688
CCR5 chemokine (C-C motif) receptor 5 | LCP:28	3.77514
CCR7 chemokine (C-C motif) receptor 7 | IMAGE:2345206	2.62099
CCRL2 chemokine (C-C motif) receptor-like 2 | IMAGE:1899192	2.53978
CD164 CD164 antigen, sialomucin | IMAGE:898198	2.07321
CD2AP CD2-associated protein | IMAGE:1268642	2.38954
CD36L2 CD36 antigen (collagen type I receptor, thrombospondin receptor)-like 2 (lysosomal integral membrane protein II) | IMAGE:2018138	2.75197
CD38 CD38 antigen (p45) | IMAGE:123264	10.7191
CD4 CD4 antigen (p55) | LCP:60	2.42526
CD47 CD47 antigen (Rh-related antigen, integrin-associated signal transducer) | IMAGE:1234114	2.33409
CD59 CD59 antigen p18-20 (antigen identified by monoclonal antibodies 16.3A5, EJ16, EJ30, EL32 and G344) | IMAGE:471941	2.19133
CD69 CD69 antigen (p60, early T-cell activation antigen) | IMAGE:1337219	4.19519
CDKN1A cyclin-dependent kinase inhibitor 1A (p21, Cip1) | IMAGE:2549557	2.00843
CENPE #centromere protein E (312kD) OR #Hs.167652 ESTs, Highly similar to 1819485A CENP-E protein [H.sapiens] | IMAGE:243149	2.00637
CEP1 centrosomal protein 1 | IMAGE:1670752	2.03402
CFLAR CASP8 and FADD-like apoptosis regulator | IMAGE:309776	2.13528
CHK choline kinase | IMAGE:1340602	2.44676
CKB creatine kinase, brain | IMAGE:361728	2.2034
CMAH cytidine monophosphate-N-acetylneuraminic acid hydroxylase (CMP-N-acetylneuraminate monooxygenase) | IMAGE:257329	2.27621
CNTN6 contactin 6 | IMAGE:257773	2.01773
COL3A1 collagen, type III, alpha 1 (Ehlers-Danlos syndrome type IV, autosomal dominant) | IMAGE:1334450	3.49543
COPEB core promoter element binding protein | IMAGE:2015885	2.13069
CSF2RB colony stimulating factor 2 receptor, beta, low-affinity (granulocyte-macrophage) | IMAGE:141115	2.25503
CTSL cathepsin L | IMAGE:345538	3.01396
CYBB cytochrome b-245, beta polypeptide (chronic granulomatous disease) | IMAGE:825243	5.89579
CYP19 #cytochrome P450, subfamily XIX (aromatization of androgens) OR #Hs.141142 ESTs | IMAGE:149737	2.02043
CYP2J2 cytochrome P450, subfamily IIJ (arachidonic acid epoxygenase) polypeptide 2 | IMAGE:454580	3.84858
DEFB1 defensin, beta 1 | IMAGE:2403485	7.07306
DJ742C19.2 phorbolin (similar to apolipoprotein B mRNA editing protein) | IMAGE:2418897	5.50481
DLL1 delta (Drosophila)-like 1 | IMAGE:30502	2.25301
DSC2 desmocollin 2 | IMAGE:2544966	2.7426
DUSP5 dual specificity phosphatase 5 | IMAGE:342378	2.55653
DUSP7 dual specificity phosphatase 7 | IMAGE:28140	2.41963
DYSF dysferlin, limb girdle muscular dystrophy 2B (autosomal recessive) | IMAGE:1914863	2.38864
E2-EPF ubiquitin carrier protein | IMAGE:810600	2.18918
E2F1 E2F transcription factor 1 | IMAGE:1318938	2.05887
ECE1 endothelin converting enzyme 1 | IMAGE:50882	2.35687
EDN1 endothelin 1 | IMAGE:47359	2.65997
EGR1 early growth response 1 | IMAGE:376370	2.32533
EIF2B1 #eukaryotic translation initiation factor 2B, subunit 1 (alpha, 26kD) OR #Hs.189584 ESTs | IMAGE:209296	2.2263
ENPP2 ectonucleotide pyrophosphatase/phosphodiesterase 2 (autotaxin) | IMAGE:785351	2.38978
EPB41 erythrocyte membrane protein band 4.1 (elliptocytosis 1, RH-linked) | IMAGE:2410241	2.79553
ERCC4 excision repair cross-complementing rodent repair deficiency, complementation group 4 | IMAGE:1643157	2.0516
ETV4 ets variant gene 4 (E1A enhancer-binding protein, E1AF) | IMAGE:430297	3.68406
ETV6 ets variant gene 6 (TEL oncogene) | IMAGE:1184132	2.18601
F8 coagulation factor VIII, procoagulant component (hemophilia A) | IMAGE:2365540	3.4947
FACL2 fatty-acid-Coenzyme A ligase, long-chain 2 | IMAGE:2014138	2.73687
FAF1 Fas (TNFRSF6) associated factor 1 | IMAGE:39144	2.51092
FCER1G Fc fragment of IgE, high affinity I, receptor for; gamma polypeptide | IMAGE:145932	2.29426
FGF1 fibroblast growth factor 1 (acidic) | IMAGE:360478	2.3738
FGF13 fibroblast growth factor 13 | IMAGE:2385663	2.31909
FGL2 fibrinogen-like 2 | IMAGE:203732	2.28702
FLJ10217 oxysterol-binding protein-related protein 1 | IMAGE:284689	3.15979
FLNA filamin A, alpha (actin-binding protein-280) | IMAGE:796282	2.50625
FMR1 fragile X mental retardation 1 | IMAGE:1233969	2.1942
FOXO1A forkhead box O1A (rhabdomyosarcoma) | IMAGE:1340213	2.2216
FT ferritin, light polypeptide | IMAGE:1671757	2.17581
FUT4 fucosyltransferase 4 (alpha (1,3) fucosyltransferase, myeloid-specific) | IMAGE:133213	3.0719
G1P3 interferon, alpha-inducible protein (clone IFI-6-16) | IMAGE:782513	2.31967
GADD45B growth arrest and DNA-damage-inducible, beta | IMAGE:1731860	3.06037
GBAP glucosidase, beta; acid, pseudogene | IMAGE:47665	2.90375
GBP1 guanylate binding protein 1, interferon-inducible, 67kD | IMAGE:712292	3.92238
GBP2 guanylate binding protein 2, interferon-inducible | IMAGE:298899	2.75095
GCH1 GTP cyclohydrolase 1 (dopa-responsive dystonia) | IMAGE:783849	4.78009
GCNT1 glucosaminyl (N-acetyl) transferase 1, core 2 (beta-1,6-N-acetylglucosaminyltransferase) | IMAGE:2244718	3.94725
GLB1 galactosidase, beta 1 | IMAGE:1493175	2.41128
GLS glutaminase | IMAGE:1272411	3.24038
GMPR guanosine monophosphate reductase | IMAGE:2063428	15.2103
GSTM5 glutathione S-transferase M5 | IMAGE:377731	2.22615
GUK1 guanylate kinase 1 | IMAGE:632681	2.09022
H.sapiens gene from PAC 747L4 | IMAGE:460159	2.90703
H2AFO H2A histone family, member O | IMAGE:488964	2.10689
HBG2 #hemoglobin, gamma G OR #Hs.173030 ESTs, Weakly similar to ALU8_HUMAN ALU SUBFAMILY SX SEQUENCE CONTAMINATION WARNING ENTRY [H.sapiens] | IMAGE:293078	2.85472
HHEX hematopoietically expressed homeobox | IMAGE:2357103	3.76684
HLA-DNA major histocompatibility complex, class II, DN alpha | IMAGE:447509	2.4948
Homo sapiens napsin 2 precursor, mRNA, partial sequence | IMAGE:1354127	2.50887
HS6ST heparan sulfate 6-O-sulfotransferase | IMAGE:969769	4.40661
HSPA1A heat shock 70kD protein 1A | IMAGE:1102543	2.06665
HSPCA #heat shock 90kD protein 1, alpha OR #Hs.193411 ESTs, Weakly similar to T43481 probable mucin DKFZp434C196.1 [H.sapiens] | IMAGE:645259	2.1678
HSXIAPAF1 XIAP associated factor-1 | IMAGE:1663164	3.74029
HU-K5 lysophospholipase-like | IMAGE:347403	2.16459
ICSBP1 interferon consensus sequence binding protein 1 | IMAGE:290230	2.27344
IFI16 interferon, gamma-inducible protein 16 | IMAGE:701332	2.826
IFI27 interferon, alpha-inducible protein 27 | IMAGE:588915	13.7468
IFI35 interferon-induced protein 35 | IMAGE:1422723	3.75558
IFI41 interferon-induced protein 41, 30kD | IMAGE:154493	3.5746
IFI75 interferon-induced protein 75, 52kD | IMAGE:79624	2.57823
IFIT1 interferon-induced protein with tetratricopeptide repeats 1 | IMAGE:2550047	27.5497
IFITM1 interferon induced transmembrane protein 1 (9-27) | IMAGE:1271427	3.86115
IFITM2 interferon induced transmembrane protein 2 (1-8D) | IMAGE:1455976	4.90306
IFITM3 interferon induced transmembrane protein 3 (1-8U) | IMAGE:809910	5.00873
IFRD1 interferon-related developmental regulator 1 | IMAGE:121948	2.22194
IFRG28 28kD interferon responsive protein | IMAGE:268385	8.32383
IGJ immunoglobulin J polypeptide, linker protein for immunoglobulin alpha and mu polypeptides | IMAGE:117806	2.53478
IGL@ immunoglobulin lambda locus | IMAGE:1240959	3.08478
IKBKG inhibitor of kappa light polypeptide gene enhancer in B-cells, kinase gamma | IMAGE:587627	2.26953
IL15 interleukin 15 | LCP:11	2.41465
IL15RA interleukin 15 receptor, alpha | IMAGE:470251	2.92866
IL18R1 interleukin 18 receptor 1 | IMAGE:755054	2.43008
IL1RN interleukin 1 receptor antagonist | IMAGE:84295	11.5076
IL6 interleukin 6 (interferon, beta 2) | LCP:79	2.54699
IL7 interleukin 7 | IMAGE:701422	2.04996
IL8RB interleukin 8 receptor, beta | IMAGE:882183	2.67771
INADL PDZ domain protein (Drosophila inaD-like) | IMAGE:206994	3.43962
INDO indoleamine-pyrrole 2,3 dioxygenase | IMAGE:740925	2.36907
INPPL1 inositol polyphosphate phosphatase-like 1 | IMAGE:686441	3.44646
IRF1 interferon regulatory factor 1 | IMAGE:1307246	2.02525
IRF2 interferon regulatory factor 2 | IMAGE:727551	13.2319
IRF7 interferon regulatory factor 7 | IMAGE:1159963	3.5314
ISG15 interferon-stimulated protein, 15 kDa | IMAGE:149319	13.7156
ISG20 #interferon stimulated gene (20kD) OR #Hs.293975 ESTs | IMAGE:815825	4.99711
ITIH2 inter-alpha (globulin) inhibitor, H2 polypeptide | IMAGE:126413	2.79188
JAK2 Janus kinase 2 (a protein tyrosine kinase) | IMAGE:2048524	3.58973
JUP junction plakoglobin | IMAGE:126320	2.24116
KCNA3 potassium voltage-gated channel, shaker-related subfamily, member 3 | IMAGE:1337856	2.59482
KDELR2 KDEL (Lys-Asp-Glu-Leu) endoplasmic reticulum protein retention receptor 2 | IMAGE:123117	2.27534
KPNB1 karyopherin (importin) beta 1 | IMAGE:684634	2.00062
KRT8 keratin 8 | IMAGE:897781	3.6497
LAG3 lymphocyte-activation gene 3 | IMAGE:2163839	2.51632
LEPR leptin receptor | IMAGE:1696157	2.65441
LGALS2 lectin, galactoside-binding, soluble, 2 (galectin 2) | IMAGE:1472743	3.36776
LGALS3BP lectin, galactoside-binding, soluble, 3 binding protein (galectin 6 binding protein) | IMAGE:811000	4.15304
LGALS9 lectin, galactoside-binding, soluble, 9 (galectin 9) | IMAGE:770192	2.04639
LMNB1 lamin B1 | IMAGE:1184257	2.55419
LMO2 LIM domain only 2 (rhombotin-like 1) | IMAGE:416474	2.6633
LOC51056 leucine aminopeptidase | IMAGE:141623	2.79941
LOC51667 NY-REN-18 antigen | IMAGE:259169	2.54274
LOC55871 COBW-like protein | IMAGE:412881	2.74117
LY6E lymphocyte antigen 6 complex, locus E | IMAGE:1470048	4.70459
LYN v-yes-1 Yamaguchi sarcoma viral related oncogene homolog | IMAGE:193913	2.02278
MAC myristoylated alanine-rich protein kinase C substrate (MARCKS, 80K-L) | IMAGE:840865	2.43941
MAP2K5 mitogen-activated protein kinase kinase 5 | IMAGE:343871	2.57906
MBNL muscleblind (Drosophila)-like | IMAGE:1308108	2.10943
MCL1 myeloid cell leukemia sequence 1 (BCL2-related) | IMAGE:145093	2.17885
MDS019 phorbolin-like protein MDS019 | IMAGE:1287889	2.73177
MEF2A MADS box transcription enhancer factor 2, polypeptide A (myocyte enhancer factor 2A) | IMAGE:713469	2.09281
MGC5363 hypothetical protein MGC5363 | IMAGE:286200	2.13958
MIG monokine induced by gamma interferon | IMAGE:503617	3.79015
MLF1 myeloid leukemia factor 1 | IMAGE:340722	2.54913
MMP16 matrix metalloproteinase 16 (membrane-inserted) | IMAGE:46916	2.09712
MNDA myeloid cell nuclear differentiation antigen | IMAGE:2010404	2.47947
MPHOSPH1 M-phase phosphoprotein 1 | IMAGE:1333695	3.57991
MRPS15 mitochondrial ribosomal protein S15 | IMAGE:346527	5.48063
MS4A7 membrane-spanning 4-domains, subfamily A, member 7 | IMAGE:1355452	2.3031
MSR1 macrophage scavenger receptor 1 | IMAGE:2354198	5.7016
MTAP44 interferon-induced, hepatitis C-associated microtubular aggregate protein (44kD) | IMAGE:1877205	11.6763
MX1 myxovirus (influenza) resistance 1, homolog of murine (interferon-inducible protein p78) | IMAGE:510152	11.4824
MX2 myxovirus (influenza) resistance 2, homolog of murine | IMAGE:471638	10.5483
MYD88 myeloid differentiation primary response gene (88) | IMAGE:489438	2.53498
NCF1 neutrophil cytosolic factor 1 (47kD, chronic granulomatous disease, autosomal 1) | IMAGE:1370776	2.00912
NFE2L3 nuclear factor (erythroid-derived 2)-like 3 | IMAGE:345069	2.2906
NKTR natural killer-tumor recognition sequence | IMAGE:1319510	2.38732
NMI N-myc (and STAT) interactor | IMAGE:704532	3.14633
NPTX1 neuronal pentraxin I | IMAGE:173674	2.44771
NR3C1 nuclear receptor subfamily 3, group C, member 1 | IMAGE:1269640	3.69683
OAS1 2',5'-oligoadenylate synthetase 1 (40-46 kD) | IMAGE:1303401	5.29399
OAS2 2'-5'-oligoadenylate synthetase 2 (69-71 kD) | IMAGE:155806	6.63521
OAS3 2'-5'-oligoadenylate synthetase 3 (100 kD) | IMAGE:2072763	18.7356
P8 p8 protein (candidate of metastasis 1) | IMAGE:80484	18.633
PAX8 paired box gene 8 | IMAGE:742101	2.4924
PBEF pre-B-cell colony-enhancing factor | IMAGE:1270880	2.22484
PDGFB platelet-derived growth factor beta polypeptide (simian sarcoma viral (v-sis) oncogene homolog) | IMAGE:345645	2.72452
PDGFRL platelet-derived growth factor receptor-like | IMAGE:2349964	3.5025
PKD2 protein kinase D2 | IMAGE:771215	2.55335
PLECKSTRIN | IMAGE:823779	2.71162
PLSCR1 phospholipid scramblase 1 | IMAGE:268736	4.65752
PMAIP1 phorbol-12-myristate-13-acetate-induced protein 1 | IMAGE:328550	2.85911
PML promyelocytic leukemia | IMAGE:705046	3.09972
PPARBP PPAR binding protein | IMAGE:1234933	3.21499
PPP2R2A protein phosphatase 2 (formerly 2A), regulatory subunit B (PR 52), alpha isoform | IMAGE:150556	2.1212
PRKAG1 protein kinase, AMP-activated, gamma 1 non-catalytic subunit | IMAGE:1302297	2.04924
PRKR protein kinase, interferon-inducible double stranded RNA dependent | IMAGE:1249340	6.74932
PRKRA protein kinase, interferon-inducible double stranded RNA dependent activator | IMAGE:796132	2.33215
PRSC1 protease, cysteine, 1 (legumain) | IMAGE:760298	3.17316
PSMB9 proteasome (prosome, macropain) subunit, beta type, 9 (large multifunctional protease 2) | IMAGE:1240661	2.47098
PTCH patched (Drosophila) homolog | IMAGE:2020180	2.6107
PTGER2 prostaglandin E receptor 2 (subtype EP2), 53kD | IMAGE:1877120	2.96249
RALB v-ral simian leukemia viral oncogene homolog B (ras related; GTP binding protein) | IMAGE:2472305	2.00709
Rat rab-related GTP-binding protein mRNA, complete cds OR #Hs.88550 ESTs | IMAGE:703969	2.24504
RBBP6 retinoblastoma-binding protein 6 | IMAGE:1370863	2.31214
RE2 G-protein coupled receptor | IMAGE:1743572	2.36771
RERE arginine-glutamic acid dipeptide (RE) repeats | IMAGE:840062	2.18343
RGS1 regulator of G-protein signalling 1 | IMAGE:361323	6.78292
RGS6 regulator of G-protein signalling 6 | IMAGE:24176	3.20821
RI58 retinoic acid- and interferon-inducible protein (58kD) | IMAGE:310105	5.26975
RNF15 ring finger protein 15 | IMAGE:665373	2.01998
RNF21 ring finger protein 21, interferon-responsive | IMAGE:1305134	2.11508
RPS6KA5 ribosomal protein S6 kinase, 90kD, polypeptide 5 | IMAGE:46705	2.14343
SAT spermidine/spermine N1-acetyltransferase | IMAGE:359835	2.21724
SCYA13 small inducible cytokine subfamily A (Cys-Cys), member 13 | IMAGE:80146	2.64809
SCYA3L1 small inducible cytokine A3-like 1 | IMAGE:153355	2.29504
SCYA7 small inducible cytokine A7 (monocyte chemotactic protein 3) | IMAGE:485989	3.74331
SCYA8 small inducible cytokine subfamily A (Cys-Cys), member 8 (monocyte chemotactic protein 2) | IMAGE:1911099	5.88988
SCYB10 small inducible cytokine subfamily B (Cys-X-Cys), member 10 | IMAGE:491243	6.64607
SCYB11 small inducible cytokine subfamily B (Cys-X-Cys), member 11 | IMAGE:1030351	42.2195
SD serine dehydratase | IMAGE:85202	2.63257
SELL selectin L (lymphocyte adhesion molecule 1) | IMAGE:701454	2.36618
SERPINA8 serine (or cysteine) proteinase inhibitor, clade A (alpha-1 antiproteinase, antitrypsin), member 8 | IMAGE:210789	33.2888
SERPIND1 serine (or cysteine) proteinase inhibitor, clade D (heparin cofactor), member 1 | IMAGE:85690	2.97077
SERPING1 serine (or cysteine) proteinase inhibitor, clade G (C1 inhibitor), member 1 | IMAGE:2541441	6.88812
SFRS10 splicing factor, arginine/serine-rich (transformer 2 Drosophila homolog) 10 | IMAGE:2121249	3.69748
SIAT9 sialyltransferase 9 (CMP-NeuAc:lactosylceramide alpha-2,3-sialyltransferase; GM3 synthase) | IMAGE:1722146	2.56593
SIT SHP2 interacting transmembrane adaptor | IMAGE:686379	2.48214
SLC30A4 solute carrier family 30 (zinc transporter), member 4 | IMAGE:826685	2.0911
SOS1 son of sevenless (Drosophila) homolog 1 | IMAGE:234191	2.09934
SP100 #nuclear antigen Sp100 OR #Hs.88445 ESTs | IMAGE:686185	3.44754
SP140 nuclear body protein Sp140 | IMAGE:1372597	2.83984
SPIB Spi-B transcription factor (Spi-1/PU.1 related) | IMAGE:1350545	6.52929
SRM300 RNA binding protein; AT-rich element binding factor | IMAGE:489453	2.22637
SSA1 Sjogren syndrome antigen A1 (52kD, ribonucleoprotein autoantigen SS-A/Ro) | IMAGE:282956	2.42801
SSI-1 JAK binding protein | IMAGE:1319238	4.16832
STAF50 stimulated trans-acting factor (50 kDa) | IMAGE:1241157	3.24484
STAT1 signal transducer and activator of transcription 1, 91kD | IMAGE:1272694	3.01872
STAT2 signal transducer and activator of transcription 2, 113kD | IMAGE:1370850	3.63917
STX11 syntaxin 11 | IMAGE:136223	2.26081
SUPT3H suppressor of Ty (S.cerevisiae) 3 homolog | IMAGE:683517	4.06453
TAP1 transporter 1, ATP-binding cassette, sub-family B (MDR/TAP) | IMAGE:841340	2.31634
TAP2 transporter 2, ATP-binding cassette, sub-family B (MDR/TAP) | IMAGE:2405842	4.02106
TARBP1 TAR (HIV) RNA-binding protein 1 | IMAGE:2544957	4.67044
TBX21 T-box 21 | IMAGE:2073364	2.0851
TCN2 transcobalamin II; macrocytic anemia | IMAGE:823864	2.62059
TCTEL1 t-complex-associated-testis-expressed 1-like 1 | IMAGE:1631194	3.25672
TFDP2 transcription factor Dp-2 (E2F dimerization partner 2) | IMAGE:685131	2.41942
TFF1 trefoil factor 1 (breast cancer, estrogen-inducible sequence expressed in) | IMAGE:2223790	5.36343
TGM1 transglutaminase 1 (K polypeptide epidermal type I, protein-glutamine-gamma-glutamyltransferase) | IMAGE:2306445	5.02572
THY1 Thy-1 cell surface antigen | IMAGE:382714	2.1928
TLR3 toll-like receptor 3 | IMAGE:144675	2.96723
TLR7 toll-like receptor 7 | IMAGE:1309296	2.86561
TNFAIP3 tumor necrosis factor, alpha-induced protein 3 | IMAGE:712368	2.0338
TNFRSF11A tumor necrosis factor receptor superfamily, member 11a, activator of NFKB | IMAGE:346544	4.76187
TNFRSF6 tumor necrosis factor receptor superfamily, member 6 | IMAGE:1235120	4.44963
TNFSF10 tumor necrosis factor (ligand) superfamily, member 10 | IMAGE:1251947	11.7836
TNFSF6 tumor necrosis factor (ligand) superfamily, member 6 | LCP:38	2.51396
TOR1B torsin family 1, member B (torsin B) | IMAGE:486076	3.43201
TRD@ T cell receptor delta locus | IMAGE:343692	2.11903
TSC403 similar to lysosome-associated membrane glycoprotein | IMAGE:2239304	3.3902
UBCH10 ubiquitin carrier protein E2-C | IMAGE:769921	2.13785
UBE1L ubiquitin-activating enzyme E1-like | IMAGE:135479	2.54756
UBE2L6 ubiquitin-conjugating enzyme E2L 6 | IMAGE:2568695	3.51454
UNC93B unc93 (C.elegans) homolog B | IMAGE:1670734	2.97728
USP18 ubiquitin specific protease 18 | IMAGE:745083	14.0162
USP25 ubiquitin specific protease 25 | IMAGE:754333	2.02512
WARS tryptophanyl-tRNA synthetase | IMAGE:1647972	2.20735
WASPIP Wiskott-Aldrich syndrome protein interacting protein | IMAGE:1301540	2.19915
WT1 Wilms tumor 1 | IMAGE:594782	2.61854
XAP4 HBV associated factor | IMAGE:2495660	2.4033
ZFD25 zinc finger protein (ZFD25) | IMAGE:703844	2.08762

## Sheet: IFNo D
Genes identified as significantly repressed in IFNo treated PBMC vs Mock
Fold change minimum 2, SAM delta 0.91140, false discovery rate of median 0.70717%
89 genes
Gene Name	Mean fold change
ASGR2 asialoglycoprotein receptor 2 | IMAGE:206795	0.34914
ASPH aspartate beta-hydroxylase | IMAGE:2310241	0.44052
BBC3 Bcl-2 binding component 3 | IMAGE:2326129	0.37629
BNIP1 BCL2/adenovirus E1B 19kD-interacting protein 1 | IMAGE:114075	0.44277
CAMK1 calcium/calmodulin-dependent protein kinase I | IMAGE:1357636	0.4422
CCR2 chemokine (C-C motif) receptor 2 | IMAGE:204539	0.43835
CD1C CD1C antigen, c polypeptide | IMAGE:428103	0.49307
CD4 CD4 antigen (p55) | LCP:60	0.4081
CD7 antigen (p41) | IMAGE:2409588	0.47563
CD79B CD79B antigen (immunoglobulin-associated beta) | LCP:173	0.47353
CD9P-1 CD9 partner 1 | IMAGE:773469	0.46414
CDA cytidine deaminase | IMAGE:1552797	0.32322
CEBPA CCAAT/enhancer binding protein (C/EBP), alpha | IMAGE:2312250	0.455325
COL15A1 collagen, type XV, alpha 1 | IMAGE:809901	0.32565
CPVL serine carboxypeptidase vitellogenic-like | IMAGE:39833	0.45444
CRIP1 cysteine-rich protein 1 (intestinal) | IMAGE:1323448	0.48494
CSTA cystatin A (stefin A) | IMAGE:345957	0.39307
CTSF cathepsin F | IMAGE:2448778	0.4961
CXCR4 chemokine (C-X-C motif), receptor 4 (fusin) | IMAGE:1272736	0.46721
CYP11A cytochrome P450, subfamily XIA (cholesterol side chain cleavage) | IMAGE:785951	0.13809
CYP4F3 cytochrome P450, subfamily IVF, polypeptide 3 (leukotriene B4 omega hydroxylase) | IMAGE:2462163	0.30709
DDAH1 dimethylarginine dimethylaminohydrolase 1 | IMAGE:269300	0.4552
DDEF2 development and differentiation enhancing factor 2 | IMAGE:298128	0.49321
DKK1 dickkopf (Xenopus laevis) homolog 1 | IMAGE:501425	0.32048
DSIPI delta sleep inducing peptide, immunoreactor | IMAGE:1671924	0.48505
DUSP1 dual specificity phosphatase 1 | IMAGE:133909	0.46568
EBI2 Epstein-Barr virus induced gene 2 (lymphocyte-specific G protein-coupled receptor) | IMAGE:484898	0.44677
FASTK Fas-activated serine/threonine kinase | IMAGE:774199	0.31803
FBP1 fructose-1,6-bisphosphatase 1 | IMAGE:433253	0.48139
FOLR2 folate receptor 2 (fetal) | IMAGE:813757	0.30036
FOLR3 folate receptor 3 (gamma) | IMAGE:324715	0.3355
FOS v-fos FBJ murine osteosarcoma viral oncogene homolog | IMAGE:26474	0.31682
FTL ferritin, light polypeptide | IMAGE:1670861	0.49576
FZD7 frizzled (Drosophila) homolog 7 | IMAGE:1087557	0.46131
GAL galanin | IMAGE:2237353	0.45007
GLG1 Golgi apparatus protein 1 | IMAGE:511387	0.48287
GNAO1 guanine nucleotide binding protein (G protein), alpha activating activity polypeptide O | IMAGE:166094	0.46719
GRO3 GRO3 oncogene | IMAGE:1556433	0.29338
H4FG H4 histone family, member G | IMAGE:1461138	0.35697
HGF hepatocyte growth factor (hepapoietin A; scatter factor) | IMAGE:1219612	0.37459
HPCAL4 hippocalcin-like protein 4 | IMAGE:42970	0.47057
HSMNP1 uncharacterized hypothalamus protein HSMNP1 | IMAGE:1471829	0.45739
ICAP-1A integrin cytoplasmic domain-associated protein 1 | IMAGE:2320870	0.49603
ID3 inhibitor of DNA binding 3, dominant negative helix-loop-helix protein | IMAGE:756405	0.45283
IGHG3 immunoglobulin heavy constant gamma 3 (G3m marker) | IMAGE:826131	0.41826
IL16 interleukin 16 (lymphocyte chemoattractant factor) | IMAGE:701504	0.47337
IL18RAP interleukin 18 receptor accessory protein | IMAGE:2355503	0.44823
IL8 interleukin 8 | IMAGE:328692	0.359115
ITGAM integrin, alpha M (complement component receptor 3, alpha; also known as CD11b (p170), macrophage antigen alpha polypeptide) | IMAGE:1031175	0.43312
LAIR2 leukocyte-associated Ig-like receptor 2 | IMAGE:502243	0.43689
LTA4H leukotriene A4 hydrolase | IMAGE:814095	0.48422
MGST2 microsomal glutathione S-transferase 2 | IMAGE:344432	0.46824
MHC2TA MHC class II transactivator | IMAGE:1130479	0.4728
MMP9 matrix metalloproteinase 9 (gelatinase B, 92kD gelatinase, 92kD type IV collagenase) | IMAGE:526335	0.42805
MRC1 mannose receptor, C type 1 | IMAGE:48886	0.14992
MYCL1 v-myc avian myelocytomatosis viral oncogene homolog 1, lung carcinoma derived | IMAGE:187616	0.4958
NRG1 neuregulin 1 | IMAGE:155716	0.43891
P125 #Sec23-interacting protein p125 OR #Hs.9634 ESTs, Highly similar to C10_HUMAN PUTATIVE C10 PROTEIN [H.sapiens] | IMAGE:701694	0.45575
PFDN5 prefoldin 5 | IMAGE:1338456	0.47044
PHLDA1 pleckstrin homology-like domain, family A, member 1 | IMAGE:667883	0.35544
PIP5K1A phosphatidylinositol-4-phosphate 5-kinase, type I, alpha | IMAGE:1351514	0.4865
PTK7 PTK7 protein tyrosine kinase 7 | IMAGE:2367369	0.41812
RARG retinoic acid receptor, gamma | IMAGE:797060	0.48796
RPL35 ribosomal protein L35 | IMAGE:2559461	0.49864
RPS10 ribosomal protein S10 | IMAGE:2252417	0.45657
RPS27 ribosomal protein S27 (metallopanstimulin 1) | IMAGE:2467016	0.42472
RPS27A ribosomal protein S27a | IMAGE:877827	0.49867
RPS29 ribosomal protein S29 | IMAGE:324144	0.3972
RTVP1 glioma pathogenesis-related protein | IMAGE:1351796	0.487405
S100A12 S100 calcium-binding protein A12 (calgranulin C) | IMAGE:436029	0.4305
S100A4 S100 calcium-binding protein A4 (calcium protein, calvasculin, metastasin, murine placental homolog) | IMAGE:472180	0.48184
SEC13L sec13-like protein | IMAGE:757210	0.22242
SERPINB6 #serine (or cysteine) proteinase inhibitor, clade B (ovalbumin), member 6 OR RPS29 #ribosomal protein S29 | IMAGE:753862	0.45311
SERPINF1 serine (or cysteine) proteinase inhibitor, clade F (alpha-2 antiplasmin, pigment epithelium derived factor), member 1 | IMAGE:2562939	0.43592
SPARC secreted protein, acidic, cysteine-rich (osteonectin) | IMAGE:324597	0.39957
SRF serum response factor (c-fos serum response element-binding transcription factor) | IMAGE:1670958	0.4477
SVIL supervillin | IMAGE:754018	0.4625
SYK spleen tyrosine kinase | IMAGE:897822	0.45438
SYNGR1 synaptogyrin 1 | IMAGE:429466	0.4728
TBCC tubulin-specific chaperone c | IMAGE:328783	0.46043
TCEB2 transcription elongation factor B (SIII), polypeptide 2 (18kD, elongin B) | IMAGE:2503812	0.49339
TCL1A T-cell leukemia/lymphoma 1A | IMAGE:746233	0.3449
TFRC transferrin receptor (p90, CD71) | IMAGE:841703	0.44094
TNFRSF7 tumor necrosis factor receptor superfamily, member 7 | IMAGE:1283094	0.43835
TRIM T-cell receptor interacting molecule | IMAGE:2142630	0.46624
TRIP10 thyroid hormone receptor interactor 10 | LCP:170	0.49993
UGT2B7 UDP glycosyltransferase 2 family, polypeptide B7 | IMAGE:1324438	0.45574
UQCRB ubiquinol-cytochrome c reductase binding protein | IMAGE:855843	0.49318
Z39IG Ig superfamily protein | IMAGE:41344	0.347975

## Sheet: IFNg U
Genes identified as significantly induced in IFNg treated PBMC vs Mock
Fold change minimum 2, SAM delta 0.87750, false discovery rate of median 0.96135%
111 genes
Gene Name	Mean Fold Change
ACLY ATP citrate lyase | IMAGE:1877676	2.47691
AIM2 absent in melanoma 2 | IMAGE:1370375	2.8332
AKAP10 A kinase (PRKA) anchor protein 10 | IMAGE:2029948	2.51804
APOL3 apolipoprotein L, 3 | IMAGE:1584411	2.75777
ATF3 activating transcription factor 3 | IMAGE:428248	2.22818
ATM ataxia telangiectasia mutated (includes complementation groups A, C and D) | IMAGE:1289110	2.01116
BF B-factor, properdin | IMAGE:741977	2.91248
C1QB complement component 1, q subcomponent, beta polypeptide | IMAGE:85128	2.9225
C4A complement component 4A | IMAGE:2559389	2.31706
CALD1 caldesmon 1 | IMAGE:813627	2.20541
CARD7 caspase recruitment domain protein 7 | IMAGE:1358265	2.09879
CASP1 caspase 1, apoptosis-related cysteine protease (interleukin 1, beta, convertase) | IMAGE:1184337	2.01914
CASP10 caspase 10, apoptosis-related cysteine protease | IMAGE:686903	2.18069
CCND2 cyclin D2 | IMAGE:366412	2.37992
CCR5 chemokine (C-C motif) receptor 5 | LCP:28	3.24538
CD38 CD38 antigen (p45) | IMAGE:123264	4.69906
CDKN1A cyclin-dependent kinase inhibitor 1A (p21, Cip1) | IMAGE:2549557	2.57985
CKB creatine kinase, brain | IMAGE:361728	2.06875
CPT1B carnitine palmitoyltransferase I, muscle | IMAGE:415978	2.02847
CSF2RB colony stimulating factor 2 receptor, beta, low-affinity (granulocyte-macrophage) | IMAGE:141115	2.43854
CTNND2 catenin (cadherin-associated protein), delta 2 (neural plakophilin-related arm-repeat protein) | IMAGE:27485	2.02059
CYBB cytochrome b-245, beta polypeptide (chronic granulomatous disease) | IMAGE:825243	3.49172
DKFZP434P0721 similar to mouse Xrn1 / Dhm2 protein | IMAGE:1186037	2.62308
EDN1 endothelin 1 | IMAGE:47359	2.37325
EPB41 erythrocyte membrane protein band 4.1 (elliptocytosis 1, RH-linked) | IMAGE:2410241	2.16056
ETAA16 ETAA16 protein | IMAGE:1369572	2.26644
ETV4 ets variant gene 4 (E1A enhancer-binding protein, E1AF) | IMAGE:430297	2.64913
F8 coagulation factor VIII, procoagulant component (hemophilia A) | IMAGE:2365540	2.25467
FACL2 fatty-acid-Coenzyme A ligase, long-chain 2 | IMAGE:2014138	2.08429
FBLN1 fibulin 1 | IMAGE:1289212	2.03103
FBXL2 f-box and leucine-rich repeat protein 2 | IMAGE:49222	2.60389
FCGR1A Fc fragment of IgG, high affinity Ia, receptor for (CD64) | IMAGE:470615	4.8596
FLII flightless I (Drosophila) homolog | IMAGE:1299811	2.0462
FMR2 fragile X mental retardation 2 | IMAGE:1352112	2.11231
GADD45B growth arrest and DNA-damage-inducible, beta | IMAGE:789155	2.02637
GBP1 guanylate binding protein 1, interferon-inducible, 67kD | IMAGE:712292	5.2852
GBP2 guanylate binding protein 2, interferon-inducible | IMAGE:298899	2.68123
GCH1 GTP cyclohydrolase 1 (dopa-responsive dystonia) | IMAGE:783849	3.13663
GCNT1 glucosaminyl (N-acetyl) transferase 1, core 2 (beta-1,6-N-acetylglucosaminyltransferase) | IMAGE:2244718	2.43108
GLS glutaminase | IMAGE:1272411	2.86125
GPR86 G protein-coupled receptor 86 | IMAGE:66596	2.37684
GSTM5 glutathione S-transferase M5 | IMAGE:377731	2.2696
HBG2 #hemoglobin, gamma G OR #Hs.173030 ESTs, Weakly similar to ALU8_HUMAN ALU SUBFAMILY SX SEQUENCE CONTAMINATION WARNING ENTRY [H.sapiens] | IMAGE:293078	2.00045
HHEX hematopoietically expressed homeobox | IMAGE:2357103	3.36187
HML2 macrophage lectin 2 (calcium dependent) | IMAGE:2011862	2.21747
HP haptoglobin | IMAGE:2428020	3.13121
ICAM1 intercellular adhesion molecule 1 (CD54), human rhinovirus receptor | IMAGE:293413	2.1281
ICSBP1 interferon consensus sequence binding protein 1 | IMAGE:290230	2.31453
IFI27 interferon, alpha-inducible protein 27 | IMAGE:588915	2.17721
IGJ immunoglobulin J polypeptide, linker protein for immunoglobulin alpha and mu polypeptides | IMAGE:117806	3.44018
IL15 interleukin 15 | IMAGE:289606	2.20606
IL15RA interleukin 15 receptor, alpha | IMAGE:470251	2.09
IL18BP interleukin 18 binding protein | IMAGE:449043	2.36015
IL1A interleukin 1, alpha | IMAGE:1271167	2.023
IL7 interleukin 7 | IMAGE:701422	3.18611
INDO indoleamine-pyrrole 2,3 dioxygenase | IMAGE:740925	2.37257
IRF1 interferon regulatory factor 1 | IMAGE:1307246	2.59981
JAK2 Janus kinase 2 (a protein tyrosine kinase) | IMAGE:2048524	3.12695
KLF2 Kruppel-like factor 2 (lung) | IMAGE:1670942	2.37354
LIMK2 LIM domain kinase 2 | IMAGE:1160723	2.84797
LMNB1 lamin B1 | IMAGE:1184257	2.50183
LOC51056 leucine aminopeptidase | IMAGE:141623	3.04304
MIG monokine induced by gamma interferon | IMAGE:503617	10.198
MMPL1 matrix metalloproteinase-like 1 | IMAGE:1353302	2.34061
MRPS15 mitochondrial ribosomal protein S15 | IMAGE:346527	2.14761
MSR1 macrophage scavenger receptor 1 | IMAGE:2354198	2.20534
MTAP44 interferon-induced, hepatitis C-associated microtubular aggregate protein (44kD) | IMAGE:1877205	2.76981
NET1 neuroepithelial cell transforming gene 1 | IMAGE:131867	2.26637
NIN ninein (GSK3B interacting protein) | IMAGE:271357	2.45738
NKTR natural killer-tumor recognition sequence | IMAGE:1319510	2.19061
NR3C1 nuclear receptor subfamily 3, group C, member 1 | IMAGE:1371945	2.04861
OAS1 2',5'-oligoadenylate synthetase 1 (40-46 kD) | IMAGE:1303401	2.15975
OAS3 2'-5'-oligoadenylate synthetase 3 (100 kD) | IMAGE:2072763	2.1441
ODZ1 odz (odd Oz/ten-m, Drosophila) homolog 1 | IMAGE:687667	2.04633
PCDH9 protocadherin 9 | IMAGE:51439	2.00759
PLA2G4C phospholipase A2, group IVC (cytosolic, calcium-independent) | IMAGE:2556649	2.57041
PLECKSTRIN | IMAGE:823779	2.80985
POLR2B polymerase (RNA) II (DNA directed) polypeptide B (140kD) | IMAGE:2451960	2.09673
PSMB9 proteasome (prosome, macropain) subunit, beta type, 9 (large multifunctional protease 2) | IMAGE:1337069	2.22926
PTCH patched (Drosophila) homolog | IMAGE:2020180	2.02979
RALB v-ral simian leukemia viral oncogene homolog B (ras related; GTP binding protein) | IMAGE:2472305	2.11134
RGS1 regulator of G-protein signalling 1 | IMAGE:686248	2.49891
SCYA8 small inducible cytokine subfamily A (Cys-Cys), member 8 (monocyte chemotactic protein 2) | IMAGE:1911099	2.62716
SCYB10 small inducible cytokine subfamily B (Cys-X-Cys), member 10 | IMAGE:491243	5.0612
SCYB11 small inducible cytokine subfamily B (Cys-X-Cys), member 11 | IMAGE:1030351	8.43551
SERPIND1 serine (or cysteine) proteinase inhibitor, clade D (heparin cofactor), member 1 | IMAGE:85690	2.25253
SERPING1 serine (or cysteine) proteinase inhibitor, clade G (C1 inhibitor), member 1 | IMAGE:2541441	6.96348
SFTPB surfactant, pulmonary-associated protein B | IMAGE:1584551	2.06386
SLAM signaling lymphocytic activation molecule | IMAGE:814251	2.64442
SLC1A5 solute carrier family 1 (neutral amino acid transporter), member 5 | IMAGE:2491434	2.64117
SP100 #nuclear antigen Sp100 OR #Hs.88445 ESTs | IMAGE:686185	2.10624
SPRY4 sprouty (Drosophila) homolog 4 | IMAGE:141854	2.3332
SRM300 RNA binding protein; AT-rich element binding factor | IMAGE:489453	3.43151
SSI-1 JAK binding protein | IMAGE:1319238	3.76369
STAT1 signal transducer and activator of transcription 1, 91kD | IMAGE:1272694	2.56201
STAT2 signal transducer and activator of transcription 2, 113kD | IMAGE:1552554	2.16185
STX11 syntaxin 11 | IMAGE:683763	2.10101
TAP1 transporter 1, ATP-binding cassette, sub-family B (MDR/TAP) | IMAGE:841340	2.01919
TAP2 transporter 2, ATP-binding cassette, sub-family B (MDR/TAP) | IMAGE:2405842	3.19823
TBX21 T-box 21 | IMAGE:2073364	2.48341
TFF1 trefoil factor 1 (breast cancer, estrogen-inducible sequence expressed in) | IMAGE:2223790	3.60973
TNFAIP2 tumor necrosis factor, alpha-induced protein 2 | IMAGE:810444	2.69103
TNFRSF6 tumor necrosis factor receptor superfamily, member 6 | IMAGE:1235120	2.81751
TNFSF10 tumor necrosis factor (ligand) superfamily, member 10 | IMAGE:1251947	3.53673
UBCH10 ubiquitin carrier protein E2-C | IMAGE:769921	2.2014
UBD diubiquitin | IMAGE:243741	3.2488
UBE2L6 ubiquitin-conjugating enzyme E2L 6 | IMAGE:725395	2.10337
UBE3A ubiquitin protein ligase E3A (human papilloma virus E6-associated protein, Angelman syndrome) | IMAGE:2021679	2.79224
VAMP5 vesicle-associated membrane protein 5 (myobrevin) | IMAGE:2021678	2.6664
VSNL1 visinin-like 1 | IMAGE:210575	2.19534
WARS tryptophanyl-tRNA synthetase | IMAGE:1647972	2.95759

## Sheet: IFNg D
Genes identified as significantly repressed in IFNg treated PBMC vs Mock
Fold change minimum 2, SAM delta 0.87750, false discovery rate of median 0.96135%
77 genes
Gene Name	Mean fold change
ALB albumin | IMAGE:712647	0.48961
ALOX5 arachidonate 5-lipoxygenase | IMAGE:2117873	0.49563
BBC3 Bcl-2 binding component 3 | IMAGE:2326129	0.47084
BNIP1 BCL2/adenovirus E1B 19kD-interacting protein 1 | IMAGE:114075	0.47523
C1QA complement component 1, q subcomponent, alpha polypeptide | IMAGE:1632252	0.42955
C5R1 complement component 5 receptor 1 (C5a ligand) | IMAGE:1565135	0.48762
CAMK1 calcium/calmodulin-dependent protein kinase I | IMAGE:52629	0.47298
CDA cytidine deaminase | IMAGE:1552797	0.36692
COL15A1 collagen, type XV, alpha 1 | IMAGE:809901	0.41357
CREME9 cytokine receptor-like molecule 9 | IMAGE:701122	0.49647
CSF2 colony stimulating factor 2 (granulocyte-macrophage) | LCP:94	0.49901
CSTA cystatin A (stefin A) | IMAGE:345957	0.48297
CYBA cytochrome b-245, alpha polypeptide | IMAGE:1161830	0.28273
CYBB cytochrome b-245, beta polypeptide (chronic granulomatous disease) | IMAGE:815673	0.42982
CYP11A cytochrome P450, subfamily XIA (cholesterol side chain cleavage) | IMAGE:785951	0.11534
CYP4F3 cytochrome P450, subfamily IVF, polypeptide 3 (leukotriene B4 omega hydroxylase) | IMAGE:2462163	0.27753
DNMT1 DNA (cytosine-5-)-methyltransferase 1 | IMAGE:1320361	0.413428
DUSP1 dual specificity phosphatase 1 | IMAGE:133909	0.433565
EBI2 Epstein-Barr virus induced gene 2 (lymphocyte-specific G protein-coupled receptor) | IMAGE:1566793	0.46068
FASTK Fas-activated serine/threonine kinase | IMAGE:774199	0.31227
FOLR3 folate receptor 3 (gamma) | IMAGE:324715	0.49797
FOS v-fos FBJ murine osteosarcoma viral oncogene homolog | IMAGE:26474	0.366525
FRAT2 GSK-3 binding protein FRAT2 | IMAGE:2117149	0.42438
FTL ferritin, light polypeptide | IMAGE:1670861	0.48152
FY Duffy blood group | IMAGE:22411	0.49029
GAL galanin | IMAGE:2237353	0.45599
GLG1 Golgi apparatus protein 1 | IMAGE:511387	0.44795
GPR35 G protein-coupled receptor 35 | IMAGE:2106931	0.45621
GRO2 GRO2 oncogene | IMAGE:80971	0.46975
GRO3 GRO3 oncogene | IMAGE:1556433	0.22998
GZMB granzyme B (granzyme 2, cytotoxic T-lymphocyte-associated serine esterase 1) | IMAGE:2310308	0.38467
H4FG H4 histone family, member G | IMAGE:1461138	0.27754
H4FI H4 histone family, member I | IMAGE:701089	0.48447
HGF hepatocyte growth factor (hepapoietin A; scatter factor) | IMAGE:1219612	0.37028
HIRA HIR (histone cell cycle regulation defective, S. cerevisiae) homolog A | IMAGE:2515754	0.31312
HMOX1 heme oxygenase (decycling) 1 | IMAGE:2274786	0.39502
ICBP90 transcription factor | IMAGE:712184	0.47988
ID3 inhibitor of DNA binding 3, dominant negative helix-loop-helix protein | IMAGE:756405	0.49358
IER3 immediate early response 3 | IMAGE:810724	0.43296
IFNGR1 interferon gamma receptor 1 | IMAGE:711993	0.49252
IGHG3 immunoglobulin heavy constant gamma 3 (G3m marker) | IMAGE:826131	0.46888
IL2RA interleukin 2 receptor, alpha | LCP:14	0.42357
IL6ST interleukin 6 signal transducer (gp130, oncostatin M receptor) | IMAGE:2018581	0.46084
IL8 interleukin 8 | IMAGE:328692	0.304375
KCNS3 potassium voltage-gated channel, delayed-rectifier, subfamily S, member 3 | IMAGE:2138030	0.45228
KOC1 IGF-II mRNA-binding protein 3 | IMAGE:624744	0.49562
KSR kinase suppressor of ras | IMAGE:133457	0.47547
LAIR2 leukocyte-associated Ig-like receptor 2 | IMAGE:502243	0.48484
LPL lipoprotein lipase | LCP:7381	0.49136
MAD4 Mad4 homolog | IMAGE:782578	0.49623
MAN1A2 mannosidase, alpha, class 1A, member 2 | IMAGE:1234761	0.4317
MS4A1 membrane-spanning 4-domains, subfamily A, member 1 | IMAGE:1591736	0.47955
MS4A7 membrane-spanning 4-domains, subfamily A, member 7 | IMAGE:1186070	0.30587
NRG1 neuregulin 1 | IMAGE:155716	0.43525
PHLDA1 pleckstrin homology-like domain, family A, member 1 | IMAGE:667883	0.39347
PIP5K1A phosphatidylinositol-4-phosphate 5-kinase, type I, alpha | IMAGE:1351514	0.387955
PMP22 peripheral myelin protein 22 | IMAGE:133273	0.43927
PTK7 PTK7 protein tyrosine kinase 7 | IMAGE:2367369	0.46623
RPS10 ribosomal protein S10 | IMAGE:2252417	0.49651
RPS27 ribosomal protein S27 (metallopanstimulin 1) | IMAGE:2467016	0.44254
RPS29 ribosomal protein S29 | IMAGE:324144	0.40607
RTVP1 #glioma pathogenesis-related protein OR HRB2 #HIV-1 rev binding protein 2 | IMAGE:684661	0.48075
RYBP RING1 and YY1 binding protein | IMAGE:469685	0.48488
S100P S100 calcium-binding protein P | IMAGE:135221	0.49838
SCYA1 small inducible cytokine A1 (I-309, homologous to mouse Tca-3) | IMAGE:1570420	0.49733
SCYC1 small inducible cytokine subfamily C, member 1 (lymphotactin) | IMAGE:1191829	0.44103
SEC13L sec13-like protein | IMAGE:757210	0.21735
SERPINB6 #serine (or cysteine) proteinase inhibitor, clade B (ovalbumin), member 6 OR RPS29 #ribosomal protein S29 | IMAGE:753862	0.42639
SPARC secreted protein, acidic, cysteine-rich (osteonectin) | IMAGE:324597	0.421445
SRF serum response factor (c-fos serum response element-binding transcription factor) | IMAGE:1670958	0.48949
SVIL supervillin | IMAGE:754018	0.47292
TBCC tubulin-specific chaperone c | IMAGE:328783	0.40796
TCL1A T-cell leukemia/lymphoma 1A | IMAGE:1241524	0.38093
TNKS2 tankyrase, TRF1-interacting ankyrin-related ADP-ribose polymerase 2 | IMAGE:73551	0.46778
TRAP150 thyroid hormone receptor-associated protein, 150 kDa subunit | IMAGE:703947	0.36365
TTK TTK protein kinase | IMAGE:1351032	0.41999
Z39IG Ig superfamily protein | IMAGE:41344	0.28634

## Sheet: IL12 U
Genes identified as significantly induced in IL12 treated PBMC vs Mock
Fold change minimum 2, SAM delta 1.03410, false discovery rate of median 0.95043%
57 genes
Gene Name	Mean fold change
ACLY ATP citrate lyase | IMAGE:1877676	2.41179
AKAP10 A kinase (PRKA) anchor protein 10 | IMAGE:2029948	2.45939
APOL3 apolipoprotein L, 3 | IMAGE:1584411	2.36177
BACH2 BTB and CNC homology 1, basic leucine zipper transcription factor 2 | IMAGE:824714	2.0231
C15ORF5 chromosome 15 open reading frame 5 | IMAGE:137356	2.09378
CALD1 caldesmon 1 | IMAGE:813627	2.52898
CARD7 caspase recruitment domain protein 7 | IMAGE:1358265	2.18321
CASK calcium/calmodulin-dependent serine protein kinase (MAGUK family) | IMAGE:2325916	2.09662
CASP1 caspase 1, apoptosis-related cysteine protease (interleukin 1, beta, convertase) | IMAGE:1184337	2.09081
CCR5 chemokine (C-C motif) receptor 5 | LCP:28	2.29011
CDKN3 cyclin-dependent kinase inhibitor 3 (CDK2-associated dual specificity phosphatase) | IMAGE:700792	2.09542
CYBB cytochrome b-245, beta polypeptide (chronic granulomatous disease) | IMAGE:825243	5.27991
DEFA1 **defensin, alpha 1, myeloid-related sequence | IMAGE:247483	2.36976
ETAA16 ETAA16 protein | IMAGE:1369572	2.26108
FBXL2 f-box and leucine-rich repeat protein 2 | IMAGE:49222	2.45633
FCER2 Fc fragment of IgE, low affinity II, receptor for (CD23A) | LCP:156	2.05744
FCGR1A Fc fragment of IgG, high affinity Ia, receptor for (CD64) | IMAGE:470615	4.02355
GBP1 guanylate binding protein 1, interferon-inducible, 67kD | IMAGE:712292	3.48767
GBP2 guanylate binding protein 2, interferon-inducible | IMAGE:346117	2.68822
GLS glutaminase | IMAGE:1272411	3.29885
GNPI glucosamine-6-phosphate isomerase | IMAGE:207082	2.13679
GSTM5 glutathione S-transferase M5 | IMAGE:377731	2.38718
Gzmc granzyme C | LCP:64	2.19568
HHEX hematopoietically expressed homeobox | IMAGE:2357103	3.9374
HP haptoglobin | IMAGE:2428020	3.17676
HSPA6 heat shock 70kD protein 6 (HSP70B') | IMAGE:2310335	2.16532
Human BRCA2 region, mRNA sequence CG006 | IMAGE:415529	2.15496
IFNG interferon, gamma | IMAGE:1579639	2.50409
IL16 interleukin 16 (lymphocyte chemoattractant factor) | IMAGE:701504	4.17398
IL18BP interleukin 18 binding protein | IMAGE:449043	2.05361
IL18R1 interleukin 18 receptor 1 | IMAGE:755054	2.44862
IL1A interleukin 1, alpha | IMAGE:1357427	2.58207
INPP5D inositol polyphosphate-5-phosphatase, 145kD | IMAGE:1337566	2.61287
INSIG1 insulin induced gene 1 | IMAGE:345603	2.58866
IRF1 interferon regulatory factor 1 | IMAGE:740476	2.12242
KLF2 Kruppel-like factor 2 (lung) | IMAGE:1670942	2.05533
KRT8 keratin 8 | IMAGE:897781	2.2185
LIMK1 LIM domain kinase 1 | IMAGE:1086811	2.03331
LY75 lymphocyte antigen 75 | IMAGE:2508733	2.01757
MIG monokine induced by gamma interferon | LCP:8	3.7905
MMPL1 matrix metalloproteinase-like 1 | IMAGE:1353302	2.67202
NIN ninein (GSK3B interacting protein) | IMAGE:271357	2.43217
PCDH9 protocadherin 9 | IMAGE:51439	2.16882
SCYB10 small inducible cytokine subfamily B (Cys-X-Cys), member 10 | IMAGE:491243	2.50015
SELL selectin L (lymphocyte adhesion molecule 1) | IMAGE:1184721	2.18543
SERPIND1 serine (or cysteine) proteinase inhibitor, clade D (heparin cofactor), member 1 | IMAGE:85690	3.09293
SLAM signaling lymphocytic activation molecule | IMAGE:814251	4.12289
SSI-1 JAK binding protein | IMAGE:1371531	2.18695
STAT1 signal transducer and activator of transcription 1, 91kD | IMAGE:840691	2.20702
TAP2 transporter 2, ATP-binding cassette, sub-family B (MDR/TAP) | IMAGE:2405842	2.32305
TBX21 T-box 21 | IMAGE:2073364	2.08556
TFF1 trefoil factor 1 (breast cancer, estrogen-inducible sequence expressed in) | IMAGE:2223790	39.2186
TNFAIP2 tumor necrosis factor, alpha-induced protein 2 | IMAGE:810444	2.77973
TNFAIP3 tumor necrosis factor, alpha-induced protein 3 | IMAGE:712368	2.33546
TNFSF10 tumor necrosis factor (ligand) superfamily, member 10 | IMAGE:203132	2.30507
TNFSF6 tumor necrosis factor (ligand) superfamily, member 6 | LCP:38	2.00547
TXK TXK tyrosine kinase | IMAGE:148421	2.19357

## Sheet: IL12 D
Genes identified as significantly repressed in IL12 treated PBMC vs Mock
Fold change minimum 2, SAM delta 1.03410, false discovery rate of median 0.95043%
53 genes
Gene Name	Mean fold change
ALB albumin | IMAGE:712647	0.29961
ASGR2 asialoglycoprotein receptor 2 | IMAGE:206795	0.48636
BBC3 Bcl-2 binding component 3 | IMAGE:2326129	0.49241
BNIP1 BCL2/adenovirus E1B 19kD-interacting protein 1 | IMAGE:114075	0.45814
C1QA complement component 1, q subcomponent, alpha polypeptide | IMAGE:1632252	0.46145
CCR8 chemokine (C-C motif) receptor 8 | IMAGE:1941548	0.46755
CD7 CD7 antigen (p41) | IMAGE:2409588	0.44943
COL15A1 collagen, type XV, alpha 1 | IMAGE:809901	0.17849
CYBA cytochrome b-245, alpha polypeptide | IMAGE:1161830	0.243005
CYBB cytochrome b-245, beta polypeptide (chronic granulomatous disease) | IMAGE:815673	0.38994
CYP11A cytochrome P450, subfamily XIA (cholesterol side chain cleavage) | IMAGE:785951	0.2867
CYP4F3 cytochrome P450, subfamily IVF, polypeptide 3 (leukotriene B4 omega hydroxylase) | IMAGE:2462163	0.28884
DKK1 dickkopf (Xenopus laevis) homolog 1 | IMAGE:501425	0.28851
DNCH1 dynein, cytoplasmic, heavy polypeptide 1 | IMAGE:415406	0.49782
DNMT1 DNA (cytosine-5-)-methyltransferase 1 | IMAGE:1320361	0.432412
ELF1 E74-like factor 1 (ets domain transcription factor) | IMAGE:684257	0.49104
EMAPL echinoderm microtubule-associated protein-like | IMAGE:784360	0.44167
FLJ12894 nuclear receptor co-repressor/HDAC3 complex subunit | IMAGE:503851	0.49316
FOLR2 folate receptor 2 (fetal) | IMAGE:813757	0.36748
FOLR3 folate receptor 3 (gamma) | IMAGE:324715	0.39929
FRAT2 GSK-3 binding protein FRAT2 | IMAGE:2117149	0.33885
FZD7 frizzled (Drosophila) homolog 7 | IMAGE:1087557	0.38516
GNG11 guanine nucleotide binding protein 11 | IMAGE:505060	0.47594
H4FG H4 histone family, member G | IMAGE:1461138	0.29652
HGF hepatocyte growth factor (hepapoietin A; scatter factor) | IMAGE:1219612	0.48517
HIRA HIR (histone cell cycle regulation defective, S. cerevisiae) homolog A | IMAGE:2515754	0.29459
HMOX1 heme oxygenase (decycling) 1 | IMAGE:2274786	0.36419
HOXB5 homeo box B5 | IMAGE:150702	0.48189
ICBP90 transcription factor | IMAGE:712184	0.43891
IGHG3 immunoglobulin heavy constant gamma 3 (G3m marker) | IMAGE:826131	0.44328
IL6ST interleukin 6 signal transducer (gp130, oncostatin M receptor) | IMAGE:2018581	0.41172
KCNS3 potassium voltage-gated channel, delayed-rectifier, subfamily S, member 3 | IMAGE:2138030	0.44318
KDELR3 KDEL (Lys-Asp-Glu-Leu) endoplasmic reticulum protein retention receptor 3 | IMAGE:625234	0.46912
KOC1 IGF-II mRNA-binding protein 3 | IMAGE:624744	0.42889
LAIR2 leukocyte-associated Ig-like receptor 2 | IMAGE:502243	0.41652
MAD4 Mad4 homolog | IMAGE:782578	0.49226
MAN1A2 mannosidase, alpha, class 1A, member 2 | IMAGE:1234761	0.42578
MRC1 mannose receptor, C type 1 | IMAGE:48886	0.31479
NF1 neurofibromin 1 (neurofibromatosis, von Recklinghausen disease, Watson disease) | IMAGE:1351479	0.47072
PIP5K1A phosphatidylinositol-4-phosphate 5-kinase, type I, alpha | IMAGE:1351514	0.382325
PTEN phosphatase and tensin homolog (mutated in multiple advanced cancers 1) | IMAGE:1371977	0.4994
PTK7 PTK7 protein tyrosine kinase 7 | IMAGE:2367369	0.48169
RPS27 ribosomal protein S27 (metallopanstimulin 1) | IMAGE:2467016	0.45387
RPS29 ribosomal protein S29 | IMAGE:324144	0.43826
RYBP RING1 and YY1 binding protein | IMAGE:469685	0.47756
SEC13L sec13-like protein | IMAGE:757210	0.17774
SERPINB6 #serine (or cysteine) proteinase inhibitor, clade B (ovalbumin), member 6 OR RPS29 #ribosomal protein S29 | IMAGE:753862	0.47415
SLC3A2 solute carrier family 3 (activators of dibasic and neutral amino acid transport), member 2 | IMAGE:586776	0.44168
SPARC secreted protein, acidic, cysteine-rich (osteonectin) | IMAGE:324597	0.46072
TCEB3 transcription elongation factor B (SIII), polypeptide 3 (110kD, elongin A) | IMAGE:2062670	0.47198
TCL1A T-cell leukemia/lymphoma 1A | IMAGE:1241524	0.41609
TNKS2 tankyrase, TRF1-interacting ankyrin-related ADP-ribose polymerase 2 | IMAGE:73551	0.37269
TRAP150 thyroid hormone receptor-associated protein, 150 kDa subunit | IMAGE:703947	0.32622

[truncated: 2 more sheets: TNFa U, TNFa D]
