# Supplementary material for: Dissecting Interferon-Induced Transcriptional Programs in Human Peripheral Blood Cells
Source: PLoS One. 2010 Mar 22;5(3):e9753. doi: 10.1371/journal.pone.0009753 (PMC2842296; doi:10.1371/journal.pone.0009753)
Supplement: Table S3 — Common response to type I interferon. 201 genes were induced after 0.6 pM treatment with IFNα, β and IFNω compared to mock (0.1% BSA/PBS) treated PBMCs. Genes identified by SAM analysis (minimum 2 fold cutoff at a false discovery rate of <1% of the median). Gene fold induction is detailed for each IFN treatment. Data are summarized in Figure 1 and Table 1. (0.05 MB XLS) [file pone.0009753.s005.xls]

## Sheet: Common Type I IFN Response
Table S3 (Waddell et al.)
Genes identified to be significantly induced after IFNa/IFNb and IFNo treatment compared to Mock
201 genes
Function	IFNa Mean	IFNb Mean	IFNo Mean
4E-T eIF4E-transporter | IMAGE:1671086	2.13258	3.08206	2.76276
ACK1 activated p21cdc42Hs kinase | IMAGE:1216323	2.56289	2.95433	2.69188
ADAR adenosine deaminase, RNA-specific | IMAGE:950367	2.17786	2.78901	2.19485
AIM2 absent in melanoma 2 | IMAGE:1370375	2.9815	4.5535	3.33226
AKAP2 A kinase (PRKA) anchor protein 2 | IMAGE:262695	4.56007	5.02548	4.43461
APOL3 apolipoprotein L, 3 | IMAGE:1584411	2.12966	3.13908	2.8201
ATF3 activating transcription factor 3 | IMAGE:428248	5.22363	6.31964	5.40404
ATF5 activating transcription factor 5 | IMAGE:1671185	2.19179	2.57749	2.2485
BAG1 BCL2-associated athanogene | IMAGE:1636251	2.02777	2.75852	2.23802
BARD1 BRCA1 associated RING domain 1 | IMAGE:430928	2.17043	2.58355	2.47143
BCL7B B-cell CLL/lymphoma 7B | IMAGE:682661	3.02926	2.68248	2.48992
BF B-factor, properdin | IMAGE:741977	9.58942	9.92028	7.381
BLVRA biliverdin reductase A | IMAGE:627542	2.03916	2.57514	2.27738
BRCA1 breast cancer 1, early onset | IMAGE:1357413	5.21963	5.80279	5.27382
BRCA2 breast cancer 2, early onset | IMAGE:711698	2.19408	2.30731	2.178
BRDG1 BCR downstream signaling 1 | IMAGE:1301195	2.53865	3.04984	2.12538
BST2 bone marrow stromal cell antigen 2 | IMAGE:811024	3.20536	3.09438	3.78629
CAD carbamoyl-phosphate synthetase 2, aspartate transcarbamylase, and dihydroorotase | IMAGE:589048	2.29297	2.11481	2.1723
CAMK2A calcium/calmodulin-dependent protein kinase (CaM kinase) II alpha | IMAGE:2163851	2.11008	2.21323	2.03067
CASP1 caspase 1, apoptosis-related cysteine protease (interleukin 1, beta, convertase) | IMAGE:1184337	2.1659	2.92284	2.71923
CASP10 caspase 10, apoptosis-related cysteine protease | IMAGE:1288007	2.5825	3.38686	3.03312
CASP5 caspase 5, apoptosis-related cysteine protease | IMAGE:341763	2.43538	2.24751	2.28553
CBR1 carbonyl reductase 1 | IMAGE:711552	2.62735	3.07272	2.32842
CCNA1 cyclin A1 | IMAGE:377799	3.8708	4.07096	3.73568
CCND2 cyclin D2 | IMAGE:366412	2.80567	4.04171	3.05446
CD2AP CD2-associated protein | IMAGE:1268642	2.39733	2.67229	2.38954
CD36L2 CD36 antigen (collagen type I receptor, thrombospondin receptor)-like 2 (lysosomal integral membrane protein II) | IMAGE:2018138	2.22776	3.08749	2.75197
CD38 CD38 antigen (p45) | IMAGE:123264	10.9186	14.4809	10.7191
CD4 CD4 antigen (p55) | LCP:60	2.14204	2.98385	2.42526
CD69 CD69 antigen (p60, early T-cell activation antigen) | IMAGE:1337219	4.29027	5.00359	4.19519
CDKN1A cyclin-dependent kinase inhibitor 1A (p21, Cip1) | IMAGE:2549557	2.16948	2.32819	2.00843
CHK choline kinase | IMAGE:1340602	2.28039	2.84049	2.44676
CNTN6 contactin 6 | IMAGE:257773	2.01735	2.19975	2.01773
COL3A1 collagen, type III, alpha 1 (Ehlers-Danlos syndrome type IV, autosomal dominant) | IMAGE:1334450	3.36688	3.92192	3.49543
COPEB core promoter element binding protein | IMAGE:2015885	2.03551	2.3847	2.13069
CTSL cathepsin L | IMAGE:345538	2.21054	2.35412	3.01396
CYP2J2 cytochrome P450, subfamily IIJ (arachidonic acid epoxygenase) polypeptide 2 | IMAGE:454580	3.82444	2.80266	3.84858
DEFB1 defensin, beta 1 | IMAGE:2403485	9.54115	10.7778	7.07306
DJ742C19.2 phorbolin (similar to apolipoprotein B mRNA editing protein) | IMAGE:2418897	4.69283	5.21755	5.50481
DLL1 delta (Drosophila)-like 1 | IMAGE:30502	2.30101	2.7935	2.25301
DSC2 desmocollin 2 | IMAGE:2544966	2.86389	3.12334	2.7426
DUSP5 dual specificity phosphatase 5 | IMAGE:342378	2.83128	3.2531	2.55653
DUSP7 dual specificity phosphatase 7 | IMAGE:28140	2.64947	3.17079	2.41963
DYSF dysferlin, limb girdle muscular dystrophy 2B (autosomal recessive) | IMAGE:1914863	2.23044	2.70635	2.38864
E2-EPF ubiquitin carrier protein | IMAGE:810600	2.12418	2.50574	2.18918
ECE1 endothelin converting enzyme 1 | IMAGE:50882	2.18262	2.69037	2.35687
EDN1 endothelin 1 | IMAGE:47359	2.12749	2.98206	2.65997
EIF2B1 #eukaryotic translation initiation factor 2B, subunit 1 (alpha, 26kD) OR #Hs.189584 ESTs | IMAGE:209296	2.04857	2.46299	2.2263
ENPP2 ectonucleotide pyrophosphatase/phosphodiesterase 2 (autotaxin) | IMAGE:785351	2.52538	3.20333	2.38978
EPB41 erythrocyte membrane protein band 4.1 (elliptocytosis 1, RH-linked) | IMAGE:2410241	2.93218	3.12461	2.79553
ETV4 ets variant gene 4 (E1A enhancer-binding protein, E1AF) | IMAGE:430297	2.93336	4.65406	3.68406
F8 coagulation factor VIII, procoagulant component (hemophilia A) | IMAGE:2365540	3.33205	3.62768	3.4947
FACL2 fatty-acid-Coenzyme A ligase, long-chain 2 | IMAGE:2014138	2.62965	3.23829	2.73687
FAF1 Fas (TNFRSF6) associated factor 1 | IMAGE:39144	2.07273	3.06714	2.51092
FGF1 fibroblast growth factor 1 (acidic) | IMAGE:360478	2.53767	3.38613	2.3738
FLNA filamin A, alpha (actin-binding protein-280) | IMAGE:796282	2.67216	2.42137	2.50625
FOXO1A forkhead box O1A (rhabdomyosarcoma) | IMAGE:1340213	2.17612	2.14548	2.2216
FT ferritin, light polypeptide | IMAGE:1671757	2.02388	2.36449	2.17581
FUT4 fucosyltransferase 4 (alpha (1,3) fucosyltransferase, myeloid-specific) | IMAGE:133213	2.87508	3.9775	3.0719
G1P3 interferon, alpha-inducible protein (clone IFI-6-16) | IMAGE:324912	2.76168	2.51498	2.31967
GADD45B growth arrest and DNA-damage-inducible, beta | IMAGE:1731860	2.40866	3.46206	3.06037
GBAP glucosidase, beta; acid, pseudogene | IMAGE:47665	2.08084	2.00144	2.90375
GBP1 guanylate binding protein 1, interferon-inducible, 67kD | IMAGE:712292	3.34144	3.92822	3.92238
GBP2 guanylate binding protein 2, interferon-inducible | IMAGE:298899	2.35508	2.62182	2.75095
GCH1 GTP cyclohydrolase 1 (dopa-responsive dystonia) | IMAGE:783849	4.57979	5.46271	4.78009
GCNT1 glucosaminyl (N-acetyl) transferase 1, core 2 (beta-1,6-N-acetylglucosaminyltransferase) | IMAGE:2244718	3.29049	5.45378	3.94725
GLS glutaminase | IMAGE:1272411	3.40667	3.47181	3.24038
GMPR guanosine monophosphate reductase | IMAGE:2063428	15.061	18.6314	15.2103
GUK1 guanylate kinase 1 | IMAGE:632681	2.17193	2.09032	2.09022
H2AFO H2A histone family, member O | IMAGE:488964	2.07638	2.31399	2.10689
HBG2 #hemoglobin, gamma G OR #Hs.173030 ESTs, Weakly similar to ALU8_HUMAN ALU SUBFAMILY SX SEQUENCE CONTAMINATION WARNING ENTRY [H.sapiens] | IMAGE:293078	2.17761	2.30787	2.85472
HLA-DNA major histocompatibility complex, class II, DN alpha | IMAGE:447509	2.16365	2.62342	2.4948
HS6ST heparan sulfate 6-O-sulfotransferase | IMAGE:969769	4.17585	4.14819	4.40661
HSPCA #heat shock 90kD protein 1, alpha OR #Hs.193411 ESTs, Weakly similar to T43481 probable mucin DKFZp434C196.1 [H.sapiens] | IMAGE:645259	2.1502	2.21626	2.1678
HSXIAPAF1 XIAP associated factor-1 | IMAGE:1663164	4.0026	4.53027	3.74029
HU-K5 lysophospholipase-like | IMAGE:347403	2.26597	3.01319	2.16459
IFI16 interferon, gamma-inducible protein 16 | IMAGE:701332	2.55868	3.22233	2.826
IFI27 interferon, alpha-inducible protein 27 | IMAGE:588915	18.944	17.138	13.7468
IFI35 interferon-induced protein 35 | IMAGE:1422723	4.15946	4.4713	3.75558
IFI41 interferon-induced protein 41, 30kD | IMAGE:154493	3.18026	4.04143	3.5746
IFI75 interferon-induced protein 75, 52kD | IMAGE:79624	2.52279	2.9315	2.57823
IFIT1 interferon-induced protein with tetratricopeptide repeats 1 | IMAGE:2550047	22.8	15.354	27.5497
IFITM1 interferon induced transmembrane protein 1 (9-27) | IMAGE:1271427	3.80866	4.27573	3.86115
IFITM2 interferon induced transmembrane protein 2 (1-8D) | IMAGE:1455976	4.56558	5.2345	4.90306
IFITM3 interferon induced transmembrane protein 3 (1-8U) | IMAGE:809910	4.8281	4.3551	5.00873
IFRD1 interferon-related developmental regulator 1 | IMAGE:121948	2.05093	2.52455	2.22194
IFRG28 28kD interferon responsive protein | IMAGE:268385	7.8836	12.5994	8.32383
IGL@ immunoglobulin lambda locus | IMAGE:1240959	2.58584	3.54485	3.08478
IKBKG inhibitor of kappa light polypeptide gene enhancer in B-cells, kinase gamma | IMAGE:587627	2.15062	2.24231	2.26953
IL15 interleukin 15 | LCP:11	2.05692	3.09778	2.41465
IL15RA interleukin 15 receptor, alpha | IMAGE:470251	3.41302	3.07724	2.92866
IL1RN interleukin 1 receptor antagonist | IMAGE:84295	10.6636	12.3069	11.5076
IL6 interleukin 6 (interferon, beta 2) | LCP:79	3.02142	2.5157	2.54699
IL8RB interleukin 8 receptor, beta | IMAGE:882183	2.58995	2.99737	2.67771
INADL PDZ domain protein (Drosophila inaD-like) | IMAGE:206994	4.23537	4.4471	3.43962
INDO indoleamine-pyrrole 2,3 dioxygenase | IMAGE:740925	2.15607	2.38823	2.36907
INPPL1 inositol polyphosphate phosphatase-like 1 | IMAGE:686441	2.69473	4.02083	3.44646
IRF2 interferon regulatory factor 2 | IMAGE:727551	12.5884	7.50327	13.2319
IRF7 interferon regulatory factor 7 | IMAGE:1159963	3.6328	3.25349	3.5314
ISG15 interferon-stimulated protein, 15 kDa | IMAGE:149319	12.361	14.5641	13.7156
ISG20 #interferon stimulated gene (20kD) OR #Hs.293975 ESTs | IMAGE:815825	5.00067	5.69709	4.99711
JAK2 Janus kinase 2 (a protein tyrosine kinase) | IMAGE:2048524	2.78131	4.02827	3.58973
JUP junction plakoglobin | IMAGE:126320	2.04855	2.5099	2.24116
KCNA3 potassium voltage-gated channel, shaker-related subfamily, member 3 | IMAGE:1337856	2.19139	2.94672	2.59482
KDELR2 KDEL (Lys-Asp-Glu-Leu) endoplasmic reticulum protein retention receptor 2 | IMAGE:123117	2.07587	2.48078	2.27534
KPNB1 karyopherin (importin) beta 1 | IMAGE:1336400	2.02335	2.16939	2.00062
KRT8 keratin 8 | IMAGE:897781	3.07613	2.85725	3.6497
LAG3 lymphocyte-activation gene 3 | IMAGE:2163839	2.66417	3.12262	2.51632
LEPR leptin receptor | IMAGE:75475	2.20309	2.5295	2.65441
LGALS2 lectin, galactoside-binding, soluble, 2 (galectin 2) | IMAGE:1472743	6.17557	4.45887	3.36776
LGALS3BP lectin, galactoside-binding, soluble, 3 binding protein (galectin 6 binding protein) | IMAGE:811000	4.04396	4.76245	4.15304
LGALS9 lectin, galactoside-binding, soluble, 9 (galectin 9) | IMAGE:770192	2.12722	2.47267	2.04639
LMNB1 lamin B1 | IMAGE:1184257	2.52932	2.71303	2.55419
LMO2 LIM domain only 2 (rhombotin-like 1) | IMAGE:416474	2.23909	3.32682	2.6633
LOC51056 leucine aminopeptidase | IMAGE:141623	2.85557	3.46913	2.79941
LOC51667 NY-REN-18 antigen | IMAGE:259169	2.39037	3.07719	2.54274
LOC55871 COBW-like protein | IMAGE:412881	2.3542	3.07288	2.74117
LY6E lymphocyte antigen 6 complex, locus E | IMAGE:1470048	5.63694	5.43468	4.70459
MAP2K5 mitogen-activated protein kinase kinase 5 | IMAGE:343871	2.72276	2.84174	2.57906
MCL1 myeloid cell leukemia sequence 1 (BCL2-related) | IMAGE:145093	2.00493	2.42068	2.17885
MDS019 phorbolin-like protein MDS019 | IMAGE:1287889	2.1829	2.58778	2.73177
MIG monokine induced by gamma interferon | IMAGE:503617	3.22229	3.38079	3.79015
MNDA myeloid cell nuclear differentiation antigen | IMAGE:2010404	2.41567	2.84154	2.47947
MPHOSPH1 M-phase phosphoprotein 1 | IMAGE:1333695	3.04407	4.38142	3.57991
MRPS15 mitochondrial ribosomal protein S15 | IMAGE:346527	3.21449	6.04689	5.48063
MSR1 macrophage scavenger receptor 1 | IMAGE:2354198	3.00773	3.11	5.7016
MTAP44 interferon-induced, hepatitis C-associated microtubular aggregate protein (44kD) | IMAGE:1877205	5.76759	10.0619	11.6763
MX1 myxovirus (influenza) resistance 1, homolog of murine (interferon-inducible protein p78) | IMAGE:510152	7.9254	13.6885	11.4824
MX2 myxovirus (influenza) resistance 2, homolog of murine | IMAGE:471638	8.80458	10.5334	10.5483
MYD88 myeloid differentiation primary response gene (88) | IMAGE:489438	2.29934	2.89748	2.53498
NFE2L3 nuclear factor (erythroid-derived 2)-like 3 | IMAGE:345069	2.43347	2.70313	2.2906
NKTR natural killer-tumor recognition sequence | IMAGE:1319510	2.27582	2.54674	2.38732
NMI N-myc (and STAT) interactor | IMAGE:704532	3.02269	3.55383	3.14633
NR3C1 nuclear receptor subfamily 3, group C, member 1 | IMAGE:1269640	3.48041	4.52896	3.69683
OAS1 2',5'-oligoadenylate synthetase 1 (40-46 kD) | IMAGE:1303401	6.03532	5.72981	5.29399
OAS2 2'-5'-oligoadenylate synthetase 2 (69-71 kD) | IMAGE:155806	5.66453	8.23651	6.63521
OAS3 2'-5'-oligoadenylate synthetase 3 (100 kD) | IMAGE:2072763	14.5131	18.2502	18.7356
P8 p8 protein (candidate of metastasis 1) | IMAGE:80484	15.0749	26.8358	18.633
PBEF pre-B-cell colony-enhancing factor | IMAGE:1270880	2.16298	2.31024	2.22484
PDGFB platelet-derived growth factor beta polypeptide (simian sarcoma viral (v-sis) oncogene homolog) | IMAGE:345645	2.42594	2.98843	2.72452
PDGFRL platelet-derived growth factor receptor-like | IMAGE:2349964	11.0566	5.92455	3.5025
PKD2 protein kinase D2 | IMAGE:771215	2.29479	2.56907	2.55335
PLSCR1 phospholipid scramblase 1 | IMAGE:268736	3.46581	4.22743	4.65752
PMAIP1 phorbol-12-myristate-13-acetate-induced protein 1 | IMAGE:328550	2.86032	2.92554	2.85911
PML promyelocytic leukemia | IMAGE:705046	3.12038	3.78604	3.09972
PPARBP PPAR binding protein | IMAGE:1234933	2.84206	3.6345	3.21499
PRKR protein kinase, interferon-inducible double stranded RNA dependent | IMAGE:1249340	5.61657	6.1575	6.74932
PRKRA protein kinase, interferon-inducible double stranded RNA dependent activator | IMAGE:796132	2.19084	2.06459	2.33215
PRSC1 protease, cysteine, 1 (legumain) | IMAGE:760298	2.08319	2.11803	3.17316
PSMB9 proteasome (prosome, macropain) subunit, beta type, 9 (large multifunctional protease 2) | IMAGE:1337069	2.48817	3.02308	2.47098
PTCH patched (Drosophila) homolog | IMAGE:2020180	2.2751	2.92434	2.6107
RE2 G-protein coupled receptor | IMAGE:1743572	2.37789	2.4474	2.36771
RGS1 regulator of G-protein signalling 1 | IMAGE:361323	4.95223	6.83939	6.78292
RGS6 regulator of G-protein signalling 6 | IMAGE:24176	2.63262	3.45318	3.20821
RI58 retinoic acid- and interferon-inducible protein (58kD) | IMAGE:310105	4.923	6.93187	5.26975
RNF15 ring finger protein 15 | IMAGE:665373	2.18112	3.10953	2.01998
RNF21 ring finger protein 21, interferon-responsive | IMAGE:1305134	2.05376	2.33613	2.11508
SAT spermidine/spermine N1-acetyltransferase | IMAGE:359835	2.21274	2.46734	2.21724
SCYA13 small inducible cytokine subfamily A (Cys-Cys), member 13 | IMAGE:80146	2.80521	3.99148	2.64809
SCYA7 small inducible cytokine A7 (monocyte chemotactic protein 3) | IMAGE:485989	3.75678	3.45026	3.74331
SCYA8 small inducible cytokine subfamily A (Cys-Cys), member 8 (monocyte chemotactic protein 2) | IMAGE:1911099	5.13258	6.27523	5.88988
SCYB10 small inducible cytokine subfamily B (Cys-X-Cys), member 10 | IMAGE:491243	5.45541	6.19625	6.64607
SCYB11 small inducible cytokine subfamily B (Cys-X-Cys), member 11 | IMAGE:1030351	40.1933	56.6167	42.2195
SERPINA8 serine (or cysteine) proteinase inhibitor, clade A (alpha-1 antiproteinase, antitrypsin), member 8 | IMAGE:210789	38.3448	48.3238	33.2888
SERPING1 serine (or cysteine) proteinase inhibitor, clade G (C1 inhibitor), member 1 | IMAGE:2541441	5.82302	8.10843	6.88812
SFRS10 splicing factor, arginine/serine-rich (transformer 2 Drosophila homolog) 10 | IMAGE:2121249	3.49065	4.07758	3.69748
SIAT9 sialyltransferase 9 (CMP-NeuAc:lactosylceramide alpha-2,3-sialyltransferase; GM3 synthase) | IMAGE:1722146	2.46043	3.08263	2.56593
SIT SHP2 interacting transmembrane adaptor | IMAGE:686379	2.26342	3.09988	2.48214
SP100 #nuclear antigen Sp100 OR #Hs.88445 ESTs | IMAGE:686185	2.9765	3.995	3.44754
SP140 nuclear body protein Sp140 | IMAGE:1372597	2.58676	3.51753	2.83984
SPIB Spi-B transcription factor (Spi-1/PU.1 related) | IMAGE:1350545	4.98883	6.85541	6.52929
SSA1 Sjogren syndrome antigen A1 (52kD, ribonucleoprotein autoantigen SS-A/Ro) | IMAGE:282956	2.32111	2.73055	2.42801
SSI-1 JAK binding protein | IMAGE:1319238	4.0862	4.5431	4.16832
STAF50 stimulated trans-acting factor (50 kDa) | IMAGE:1241157	2.84991	3.98274	3.24484
STAT1 signal transducer and activator of transcription 1, 91kD | IMAGE:1272694	2.7498	3.2858	3.01872
STAT2 signal transducer and activator of transcription 2, 113kD | IMAGE:1370850	3.00973	3.61435	3.63917
STX11 syntaxin 11 | IMAGE:683763	2.22777	2.56651	2.26081
SUPT3H suppressor of Ty (S.cerevisiae) 3 homolog | IMAGE:683517	4.34216	4.82285	4.06453
TAP1 transporter 1, ATP-binding cassette, sub-family B (MDR/TAP) | IMAGE:841340	2.37994	2.80201	2.31634
TAP2 transporter 2, ATP-binding cassette, sub-family B (MDR/TAP) | IMAGE:1354020	2.17401	3.0113	4.02106
TARBP1 TAR (HIV) RNA-binding protein 1 | IMAGE:2544957	4.00539	5.45617	4.67044
TCN2 transcobalamin II; macrocytic anemia | IMAGE:823864	2.68248	2.94536	2.62059
TCTEL1 t-complex-associated-testis-expressed 1-like 1 | IMAGE:1631194	3.40032	4.1792	3.25672
TFDP2 transcription factor Dp-2 (E2F dimerization partner 2) | IMAGE:685131	2.18903	2.57295	2.41942
TGM1 transglutaminase 1 (K polypeptide epidermal type I, protein-glutamine-gamma-glutamyltransferase) | IMAGE:2306445	7.5867	5.8513	5.02572
TLR3 toll-like receptor 3 | IMAGE:144675	3.51874	4.82008	2.96723
TLR7 toll-like receptor 7 | IMAGE:1309296	2.25524	2.78255	2.86561
TNFRSF11A tumor necrosis factor receptor superfamily, member 11a, activator of NFKB | IMAGE:346544	3.02267	4.91055	4.76187
TNFRSF6 tumor necrosis factor receptor superfamily, member 6 | IMAGE:1235120	3.14238	4.56443	4.44963
TNFSF10 tumor necrosis factor (ligand) superfamily, member 10 | IMAGE:1251947	8.78759	12.1461	11.7836
TNFSF6 tumor necrosis factor (ligand) superfamily, member 6 | LCP:38	2.34612	3.29567	2.51396
TOR1B torsin family 1, member B (torsin B) | IMAGE:486076	3.01623	3.78373	3.43201
TRD@ T cell receptor delta locus | IMAGE:343692	2.17958	2.76546	2.11903
TSC403 similar to lysosome-associated membrane glycoprotein | IMAGE:2239304	2.88605	4.20337	3.3902
UBE1L ubiquitin-activating enzyme E1-like | IMAGE:135479	2.28287	3.05553	2.54756
UBE2L6 ubiquitin-conjugating enzyme E2L 6 | IMAGE:2568695	3.0117	4.23117	3.51454
UNC93B unc93 (C.elegans) homolog B | IMAGE:1670734	2.44757	2.91431	2.97728
USP18 ubiquitin specific protease 18 | IMAGE:745083	13.5754	15.0573	14.0162
WARS tryptophanyl-tRNA synthetase | IMAGE:855786	2.10118	2.48303	2.20735
WT1 Wilms tumor 1 | IMAGE:594782	2.20246	2.75602	2.61854
XAP4 HBV associated factor | IMAGE:2495660	2.28679	2.73531	2.4033
