# Supplementary material for: Dissecting Interferon-Induced Transcriptional Programs in Human Peripheral Blood Cells
Source: PLoS One. 2010 Mar 22;5(3):e9753. doi: 10.1371/journal.pone.0009753 (PMC2842296; doi:10.1371/journal.pone.0009753)
Supplement: Table S6 — The cell type-specific nature of IFNγ transcriptional programs. Purified subsets of CD4+ T cells, CD8+ T cells, B cells, NK cells and monocytes were stimulated with 0.6 pM IFNγ and sampled at 0.5, 1, 4, 8, 12 and 24 h. Genes significantly induced (determined using the SAM algorithm, minimum 2 fold cutoff at a false discovery rate of <1% of the median) by IFNγ are indicated for each purified cell subset together with mean fold expression ratios. The genes are ordered alphabetically, using gene annotation from Source [70]. Data are depicted in Figure 3b. (0.08 MB XLS) [file pone.0009753.s008.xls]

## Sheet: B Cell
Table S5 (Waddell et al.)
Genes significantly induced by 0.6 pM IFNg treatment of purified B cells compared to mock treated (0.1% BSA/PBS)
80 genes
Source Gene ID and putative function	Fold Induction
ADAMTS3 a disintegrin-like and metalloprotease (reprolysin type) with thrombospondin type 1 motif, 3 | IMAGE:727026	2.17265
AIM2 absent in melanoma 2 | IMAGE:1370375	2.28415
AK3 adenylate kinase 3 | IMAGE:295176	2.30854
APOL3 apolipoprotein L, 3 | IMAGE:1584411	2.19992
BATF basic leucine zipper transcription factor, ATF-like | IMAGE:1184080	2.12702
BCL2L1 BCL2-like 1 | IMAGE:1568561	2.05429
BRCA1 breast cancer 1, early onset | IMAGE:1357413	2.82491
CASP5 caspase 5, apoptosis-related cysteine protease | IMAGE:341763	2.66491
CCND2 cyclin D2 | IMAGE:366412	6.80948
CD38 CD38 antigen (p45) | IMAGE:123264	2.7325
CD69 CD69 antigen (p60, early T-cell activation antigen) | IMAGE:1337219	2.20386
CHK choline kinase | IMAGE:1340602	3.55242
CLCN3 chloride channel 3 | IMAGE:796341	2.73611
CNR2 cannabinoid receptor 2 (macrophage) | IMAGE:1334943	2.04901
CTGF connective tissue growth factor | IMAGE:2066693	2.06803
EPB41 erythrocyte membrane protein band 4.1 (elliptocytosis 1, RH-linked) | IMAGE:2410241	6.02014
ETV4 ets variant gene 4 (E1A enhancer-binding protein, E1AF) | IMAGE:430297	8.03408
F8 coagulation factor VIII, procoagulant component (hemophilia A) | IMAGE:2365540	7.96469
FCGR1A Fc fragment of IgG, high affinity Ia, receptor for (CD64) | IMAGE:470615	9.94433
GBP1 guanylate binding protein 1, interferon-inducible, 67kD | IMAGE:712292	15.2174
GBP2 guanylate binding protein 2, interferon-inducible | IMAGE:298899	5.27377
GLS glutaminase | IMAGE:1272411	2.98988
GLB1 galactosidase, beta 1 | IMAGE:1493175	3.99207
GNAS1 guanine nucleotide binding protein (G protein), alpha stimulating activity polypeptide 1 | IMAGE:2545591	2.91352
HLA-DRB5 major histocompatibility complex, class II, DR beta 5 | IMAGE:713065	2.67977
HM74 putative chemokine receptor; GTP-binding protein | IMAGE:1130777	2.41359
HPRT1 hypoxanthine phosphoribosyltransferase 1 (Lesch-Nyhan syndrome) | IMAGE:44296	2.27227
ICAM1 intercellular adhesion molecule 1 (CD54), human rhinovirus receptor | IMAGE:145112	3.20355
IFI35 interferon-induced protein 35 | IMAGE:1422723	2.21484
IFITM1 interferon induced transmembrane protein 1 (9-27) | IMAGE:1271427	4.06023
IFRG28 28kD interferon responsive protein | IMAGE:268385	2.35753
IL15RA interleukin 15 receptor, alpha | IMAGE:488019	2.33711
INAD PDZ domain protein (Drosophila inaD-like) | IMAGE:206994	2.45922
INDO indoleamine-pyrrole 2,3 dioxygenase | IMAGE:740925	6.45794
INPP1 inositol polyphosphate-1-phosphatase | IMAGE:180803	3.22526
IRF1 interferon regulatory factor 1 | IMAGE:1307246	4.27689
IRF7 interferon regulatory factor 7 | IMAGE:740117	2.19924
ISG20 interferon stimulated gene (20kD) | IMAGE:1351990	2.06306
LOC51056 leucine aminopeptidase | IMAGE:141623	2.58788
MCL1 myeloid cell leukemia sequence 1 (BCL2-related) | IMAGE:145093	2.08718
MIG monokine induced by gamma interferon | LCP:8	4.3126
MSR1 macrophage scavenger receptor 1 | IMAGE:2354198	7.5701
MTAP44 interferon-induced, hepatitis C-associated microtubular aggregate protein (44kD) | IMAGE:1877205	2.45172
MTHFD2 methylene tetrahydrofolate dehydrogenase (NAD+ dependent), methenyltetrahydrofolate cyclohydrolase | IMAGE:2014034	2.18833
NKTR natural killer-tumor recognition sequence | IMAGE:1319510	2.46498
OAS2 2'-5'-oligoadenylate synthetase 2 (69-71 kD) | IMAGE:685528	2.1091
PMAIP1 phorbol-12-myristate-13-acetate-induced protein 1 | IMAGE:328550	2.62136
PSMB8 proteasome (prosome, macropain) subunit, beta type, 8 (large multifunctional protease 7) | IMAGE:2510979	2.0301
PSMB9 proteasome (prosome, macropain) subunit, beta type, 9 (large multifunctional protease 2) | IMAGE:1240661	3.00143
PSME1 proteasome (prosome, macropain) activator subunit 1 (PA28 alpha) | IMAGE:71434	2.10093
PSME2 proteasome (prosome, macropain) activator subunit 2 (PA28 beta) | IMAGE:210405	2.51078
PSTPIP2 proline-serine-threonine phosphatase interacting protein 2 | IMAGE:417784	2.02285
RARRES3 retinoic acid receptor responder (tazarotene induced) 3 | IMAGE:324225	4.22511
RPS9 ribosomal protein S9 | IMAGE:1087015	2.55667
SCYA25 small inducible cytokine subfamily A (Cys-Cys), member 25 | IMAGE:298303	2.10005
SCYA8 small inducible cytokine subfamily A (Cys-Cys), member 8 (monocyte chemotactic protein 2) | IMAGE:1911099	2.11563
SCYB10 small inducible cytokine subfamily B (Cys-X-Cys), member 10 | IMAGE:491243	50.6782
SCYB11 small inducible cytokine subfamily B (Cys-X-Cys), member 11 | IMAGE:1030351	2.97862
SERPING1 serine (or cysteine) proteinase inhibitor, clade G (C1 inhibitor), member 1 | IMAGE:2541441	7.5118
SLAM signaling lymphocytic activation molecule | IMAGE:1354667	2.09107
SRM300 RNA binding protein; AT-rich element binding factor | IMAGE:489453	7.38222
SSA1 Sjogren syndrome antigen A1 (52kD, ribonucleoprotein autoantigen SS-A/Ro) | IMAGE:282956	2.08366
SSI-1 JAK binding protein | IMAGE:1319238	5.65095
SSI-3 #STAT induced STAT inhibitor 3 OR #Hs.311405 ESTs | IMAGE:362278	2.81208
STAF50 stimulated trans-acting factor (50 kDa) | IMAGE:1241157	2.14581
STAT1 signal transducer and activator of transcription 1, 91kD | IMAGE:1272694	4.97453
TAP1 transporter 1, ATP-binding cassette, sub-family B (MDR/TAP) | IMAGE:1925995	3.07115
TAP2 transporter 2, ATP-binding cassette, sub-family B (MDR/TAP) | IMAGE:1354020	2.15951
TCEB3 transcription elongation factor B (SIII), polypeptide 3 (110kD, elongin A) | IMAGE:526657	3.59343
TCTEL1 t-complex-associated-testis-expressed 1-like 1 | IMAGE:1631194	2.05767
TFF3 trefoil factor 3 (intestinal) | IMAGE:298417	2.02163
TLR7 toll-like receptor 7 | IMAGE:1309296	2.40901
TNFRSF6 tumor necrosis factor receptor superfamily, member 6 | IMAGE:1235120	6.51607
TNFSF10 tumor necrosis factor (ligand) superfamily, member 10 | IMAGE:1251947	2.41075
UBD diubiquitin | IMAGE:243741	4.20141
UBE2L6 ubiquitin-conjugating enzyme E2L 6 | IMAGE:2568695	3.48943
VAMP5 vesicle-associated membrane protein 5 (myobrevin) | IMAGE:2021870	3.24646
WARS tryptophanyl-tRNA synthetase | IMAGE:1647972	5.44369
ZNF187 zinc finger protein 187 | IMAGE:361899	2.37395
ZNF24 zinc finger protein 24 (KOX 17) | IMAGE:263836	2.21589

## Sheet: CD4
Genes significantly induced by 0.6 pM IFNg treatment of purified CD4 cells compared to mock treated (0.1% BSA/PBS)
36 genes
Source Gene ID and putative function	Fold Induction
APOL3 apolipoprotein L, 3 | IMAGE:1584411	2.02487
CHK choline kinase | IMAGE:1340602	2.44455
CNR2 cannabinoid receptor 2 (macrophage) | IMAGE:1334943	2.6813
FCGR1A Fc fragment of IgG, high affinity Ia, receptor for (CD64) | IMAGE:470615	9.66091
GBP1 guanylate binding protein 1, interferon-inducible, 67kD | IMAGE:712292	4.58878
GBP2 guanylate binding protein 2, interferon-inducible | IMAGE:298899	2.40236
GLS glutaminase | IMAGE:1272411	4.18516
GLB1 galactosidase, beta 1 | IMAGE:1493175	2.35747
HLA-DQA1 major histocompatibility complex, class II, DQ alpha 1 | IMAGE:1883186	2.49217
HLA-DRA major histocompatibility complex, class II, DR alpha | IMAGE:117411	2.24548
HLA-DRB1 major histocompatibility complex, class II, DR beta 1 | IMAGE:417711	2.07353
HLA-DRB5 major histocompatibility complex, class II, DR beta 5 | IMAGE:1241341	2.09841
HM74 putative chemokine receptor; GTP-binding protein | IMAGE:1130777	2.79151
HSXIAPAF1 XIAP associated factor-1 | IMAGE:1663164	2.19491
ICAM1 intercellular adhesion molecule 1 (CD54), human rhinovirus receptor | IMAGE:86017	2.15834
ICSBP1 interferon consensus sequence binding protein 1 | IMAGE:290230	2.44163
IFRG28 28kD interferon responsive protein | IMAGE:268385	2.22183
IGJ immunoglobulin J polypeptide, linker protein for immunoglobulin alpha and mu polypeptides | IMAGE:117806	2.84121
INAD PDZ domain protein (Drosophila inaD-like) | IMAGE:206994	2.04153
INDO indoleamine-pyrrole 2,3 dioxygenase | IMAGE:740925	6.45853
IRF1 interferon regulatory factor 1 | IMAGE:1307246	3.12846
ISGF3G interferon-stimulated transcription factor 3, gamma (48kD) | IMAGE:724588	2.05674
MIG monokine induced by gamma interferon | LCP:8	6.41312
PLECKSTRIN | IMAGE:823779	2.8359
PSTPIP2 proline-serine-threonine phosphatase interacting protein 2 | IMAGE:417784	2.00067
RGS1 regulator of G-protein signalling 1 | IMAGE:686248	2.22755
RPS9 ribosomal protein S9 | IMAGE:1087015	2.49392
SCYA8 small inducible cytokine subfamily A (Cys-Cys), member 8 (monocyte chemotactic protein 2) | IMAGE:1911099	2.18745
SCYB10 small inducible cytokine subfamily B (Cys-X-Cys), member 10 | IMAGE:491243	14.6028
SERPING1 serine (or cysteine) proteinase inhibitor, clade G (C1 inhibitor), member 1 | IMAGE:756556	4.14395
SRM300 RNA binding protein; AT-rich element binding factor | IMAGE:489453	2.5438
STAT1 signal transducer and activator of transcription 1, 91kD | IMAGE:1272694	5.0372
TRD@ T cell receptor delta locus | IMAGE:343692	2.11007
TSC403 similar to lysosome-associated membrane glycoprotein | IMAGE:2239304	2.09909
UBE2L6 ubiquitin-conjugating enzyme E2L 6 | IMAGE:2568695	2.33163
WARS tryptophanyl-tRNA synthetase | IMAGE:1647972	2.45406

## Sheet: CD8
Genes significantly induced by 0.6 pM IFNg treatment of purified CD8 cells compared to mock treated (0.1% BSA/PBS)
21 genes
Source Gene ID and putative function	Fold Induction
ANKRD3 ankyrin repeat domain 3 | IMAGE:344854	2.06087
CNR2 cannabinoid receptor 2 (macrophage) | IMAGE:1334943	2.22317
FCGR1A Fc fragment of IgG, high affinity Ia, receptor for (CD64) | IMAGE:470615	7.24266
GBP1 guanylate binding protein 1, interferon-inducible, 67kD | IMAGE:712292	3.74386
GLS glutaminase | IMAGE:1272411	2.90559
GNAS1 guanine nucleotide binding protein (G protein), alpha stimulating activity polypeptide 1 | IMAGE:2545591	2.37881
GNG11 guanine nucleotide binding protein 11 | IMAGE:505060	3.78677
HM74 putative chemokine receptor; GTP-binding protein | IMAGE:1130777	2.50833
ICAM1 intercellular adhesion molecule 1 (CD54), human rhinovirus receptor | IMAGE:145112	2.15745
ICSBP1 interferon consensus sequence binding protein 1 | IMAGE:290230	2.3154
INDO indoleamine-pyrrole 2,3 dioxygenase | IMAGE:740925	4.60607
IRF1 interferon regulatory factor 1 | IMAGE:1307246	2.29292
MIG monokine induced by gamma interferon | LCP:8	5.40313
RPS9 ribosomal protein S9 | IMAGE:1087015	2.49376
SCYB10 small inducible cytokine subfamily B (Cys-X-Cys), member 10 | IMAGE:491243	17.5292
SCYB11 small inducible cytokine subfamily B (Cys-X-Cys), member 11 | IMAGE:1030351	2.20571
SERPING1 serine (or cysteine) proteinase inhibitor, clade G (C1 inhibitor), member 1 | IMAGE:756556	3.85415
SSI-1 JAK binding protein | IMAGE:1319238	2.09232
SSI-3 #STAT induced STAT inhibitor 3 OR #Hs.311405 ESTs | IMAGE:362278	2.14196
STAT1 signal transducer and activator of transcription 1, 91kD | IMAGE:1272694	4.81114
UBD diubiquitin | IMAGE:243741	2.88791

## Sheet: NK Cell
Genes significantly induced by 0.6 pM IFNg treatment of purified NK cells compared to mock treated (0.1% BSA/PBS)
17 genes
Source Gene ID and putative function	Fold Induction
AIM2 absent in melanoma 2 | IMAGE:2133366	2.02233
BTN3A2 butyrophilin, subfamily 3, member A2 | IMAGE:1492144	2.04236
CD79B CD79B antigen (immunoglobulin-associated beta) | IMAGE:1241490	2.1329
COL4A2 collagen, type IV, alpha 2 | IMAGE:769959	2.54903
DKK1 dickkopf (Xenopus laevis) homolog 1 | IMAGE:501425	14.2071
FCGR1A Fc fragment of IgG, high affinity Ia, receptor for (CD64) | IMAGE:470615	2.84456
FPR1 formyl peptide receptor 1 | LCP:35	3.17423
HBB hemoglobin, beta | IMAGE:2461206	2.23516
HM74 putative chemokine receptor; GTP-binding protein | IMAGE:1130777	2.51832
IGF2 insulin-like growth factor 2 (somatomedin A) | IMAGE:245330	2.05804
IL1A interleukin 1, alpha | IMAGE:1353982	2.29694
LTB lymphotoxin beta (TNF superfamily, member 3) | IMAGE:1272604	2.0415
RPS9 ribosomal protein S9 | IMAGE:1087015	2.12743
SCYB10 small inducible cytokine subfamily B (Cys-X-Cys), member 10 | IMAGE:491243	4.23127
SERPINB7 serine (or cysteine) proteinase inhibitor, clade B (ovalbumin), member 7 | IMAGE:1509935	2.87026
SERPING1 serine (or cysteine) proteinase inhibitor, clade G (C1 inhibitor), member 1 | IMAGE:2541441	2.51561
SSI-1 JAK binding protein | IMAGE:1319238	2.22387

## Sheet: Monocyte
Genes significantly induced by 0.6 pM IFNg treatment of purified monocytes compared to mock treated (0.1% BSA/PBS)
294 genes
Source Gene ID and putative function	Fold Induction
ABCE1 ATP-binding cassette, sub-family E (OABP), member 1 | IMAGE:80946	2.17699
AIM2 absent in melanoma 2 | IMAGE:1370375	6.10374
AK3 adenylate kinase 3 | IMAGE:295176	2.16019
AKAP7 A kinase (PRKA) anchor protein 7 | IMAGE:195751	2.05101
ALAS1 aminolevulinate, delta-, synthase 1 | IMAGE:813651	2.40413
ALDH1A1 aldehyde dehydrogenase 1 family, member A1 | IMAGE:855624	2.60138
APOL1 apolipoprotein L | IMAGE:2228544	3.18455
APOL3 apolipoprotein L, 3 | IMAGE:1584411	10.5774
ARGBP2 Arg/Abl-interacting protein ArgBP2 | IMAGE:1604351	2.07443
ARHH ras homolog gene family, member H | IMAGE:302591	2.67397
ARL2 ADP-ribosylation factor-like 2 | IMAGE:2577105	2.10553
ASPH aspartate beta-hydroxylase | IMAGE:2310241	2.02725
ATF5 activating transcription factor 5 | IMAGE:1671185	2.14911
BACE beta-site APP-cleaving enzyme | IMAGE:490377	2.00392
BACH1 BTB and CNC homology 1, basic leucine zipper transcription factor 1 | IMAGE:1638852	2.17745
BATF basic leucine zipper transcription factor, ATF-like | IMAGE:1184080	2.48528
BBC3 Bcl-2 binding component 3 | IMAGE:2326129	2.5097
BCL6 B-cell CLL/lymphoma 6 (zinc finger protein 51) | IMAGE:1340526	2.21356
BF B-factor, properdin | IMAGE:741977	5.12222
BRCA1 breast cancer 1, early onset | IMAGE:1357413	3.15832
BST1 bone marrow stromal cell antigen 1 | IMAGE:250126	5.0647
BTN3A3 butyrophilin, subfamily 3, member A3 | IMAGE:2436859	2.83649
CS citrate synthase | IMAGE:1341363	2.64788
C2 complement component 2 | IMAGE:85497	5.54877
C4A complement component 4A | IMAGE:2559389	3.78505
CAMK2D calcium/calmodulin-dependent protein kinase (CaM kinase) II delta | IMAGE:1303083	2.75861
CASP10 caspase 10, apoptosis-related cysteine protease | IMAGE:1288007	2.30947
CASP4 caspase 4, apoptosis-related cysteine protease | IMAGE:199522	2.23459
CASP5 caspase 5, apoptosis-related cysteine protease | IMAGE:341763	2.12639
CBR1 carbonyl reductase 1 | IMAGE:711552	3.13158
CCND2 cyclin D2 | IMAGE:366412	3.09778
CCRL2 chemokine (C-C motif) receptor-like 2 | IMAGE:1899192	2.11798
CD36 CD36 antigen (collagen type I receptor, thrombospondin receptor) | IMAGE:243816	2.51653
CD38 CD38 antigen (p45) | IMAGE:123264	8.53629
CD69 CD69 antigen (p60, early T-cell activation antigen) | IMAGE:1337219	10.1899
CD97 CD97 antigen | IMAGE:1155632	2.11794
CDC25B cell division cycle 25B | IMAGE:1354190	2.92704
CDKN1A cyclin-dependent kinase inhibitor 1A (p21, Cip1) | IMAGE:2549557	3.28305
CDKN3 cyclin-dependent kinase inhibitor 3 (CDK2-associated dual specificity phosphatase) | IMAGE:700792	2.21923
CEBPA CCAAT/enhancer binding protein (C/EBP), alpha | IMAGE:2312250	2.18268
CHK choline kinase | IMAGE:1340602	4.08084
CHN1 chimerin (chimaerin) 1 | IMAGE:39937	2.07079
CISH cytokine inducible SH2-containing protein | IMAGE:724632	3.44756
CLCN3 chloride channel 3 | IMAGE:796341	3.23612
CLIC4 chloride intracellular channel 4 | IMAGE:1559001	2.47385
CMAH cytidine monophosphate-N-acetylneuraminic acid hydroxylase (CMP-N-acetylneuraminate monooxygenase) | IMAGE:257329	3.3018
CNR2 cannabinoid receptor 2 (macrophage) | IMAGE:1334943	2.85107
COL16A1 collagen, type XVI, alpha 1 | IMAGE:2511178	2.42698
CR2 complement component (3d/Epstein Barr virus) receptor 2 | LCP:101	2.14249
CRLF1 cytokine receptor-like factor 1 | IMAGE:490004	2.94547
CSE1 chromosome segregation 1 (yeast homolog)-like | IMAGE:293934	2.26819
CSF2RB colony stimulating factor 2 receptor, beta, low-affinity (granulocyte-macrophage) | IMAGE:141115	2.24867
CSNK1D casein kinase 1, delta | IMAGE:686390	2.13416
CTSO cathepsin O | IMAGE:2404199	2.27811
DDEF2 development and differentiation enhancing factor 2 | IMAGE:298128	2.385
DDX21 DEAD/H (Asp-Glu-Ala-Asp/His) box polypeptide 21 | IMAGE:2543348	2.14339
DEC2 bHLH protein DEC2 | IMAGE:595078	2.57815
DECR1 2,4-dienoyl CoA reductase 1, mitochondrial | IMAGE:1317265	2.22965
DEK DEK oncogene (DNA binding) | IMAGE:133136	2.00605
DLEU1 deleted in lymphocytic leukemia, 1 | IMAGE:299717	2.15481
DNAM-1 adhesion glycoprotein | IMAGE:1703954	3.30989
DUSP5 dual specificity phosphatase 5 | IMAGE:342378	3.14273
DYSF dysferlin, limb girdle muscular dystrophy 2B (autosomal recessive) | IMAGE:1914863	2.03478
EDN1 endothelin 1 | IMAGE:47359	3.44527
EGFL5 EGF-like-domain, multiple 5 | IMAGE:685272	2.32492
EGR2 early growth response 2 (Krox-20 (Drosophila) homolog) | IMAGE:781017	2.90768
ENPP2 ectonucleotide pyrophosphatase/phosphodiesterase 2 (autotaxin) | IMAGE:785351	3.0691
EPB41 erythrocyte membrane protein band 4.1 (elliptocytosis 1, RH-linked) | IMAGE:2410241	4.34731
EPB72 erythrocyte membrane protein band 7.2 (stomatin) | IMAGE:138936	2.41271
EPS15 epidermal growth factor receptor pathway substrate 15 | IMAGE:1357019	2.62348
ESR1 estrogen receptor 1 | IMAGE:725321	2.16756
ETV4 ets variant gene 4 (E1A enhancer-binding protein, E1AF) | IMAGE:430297	3.80239
EVA1 epithelial V-like antigen 1 | IMAGE:853998	2.59557
F8 coagulation factor VIII, procoagulant component (hemophilia A) | IMAGE:2365540	3.58033
FANCA Fanconi anemia, complementation group A | IMAGE:682642	2.08274
FCGR1A Fc fragment of IgG, high affinity Ia, receptor for (CD64) | IMAGE:470615	8.83137
FECH ferrochelatase (protoporphyria) | IMAGE:66728	2.29954
FER1L3 fer-1 (C.elegans)-like 3 (myoferlin) | IMAGE:810441	3.84405
FGL2 fibrinogen-like 2 | IMAGE:203732	2.18322
FGR Gardner-Rasheed feline sarcoma viral (v-fgr) oncogene homolog | LCP:44	2.62753
FYB FYN-binding protein (FYB-120/130) | IMAGE:1486194	2.31053
GADD45B growth arrest and DNA-damage-inducible, beta | IMAGE:1731860	3.46986
GBP1 guanylate binding protein 1, interferon-inducible, 67kD | IMAGE:712292	27.1223
GBP2 guanylate binding protein 2, interferon-inducible | IMAGE:298899	7.64446
GCH1 GTP cyclohydrolase 1 (dopa-responsive dystonia) | IMAGE:1339512	5.1753
GCLC glutamate-cysteine ligase, catalytic subunit | IMAGE:2006131	2.18054
GCN5L2 GCN5 (general control of amino-acid synthesis, yeast, homolog)-like 2 | IMAGE:1570318	2.05506
GCNT1 glucosaminyl (N-acetyl) transferase 1, core 2 (beta-1,6-N-acetylglucosaminyltransferase) | IMAGE:2244718	8.33161
GLS glutaminase | IMAGE:1272411	4.16996
GLB1 galactosidase, beta 1 | IMAGE:1493175	4.11329
GNG10 guanine nucleotide binding protein 10 | IMAGE:1251377	2.22572
GSTA2 glutathione S-transferase A2 | IMAGE:82710	2.02175
GYPC glycophorin C (Gerbich blood group) | IMAGE:344720	2.25963
HBG2 #hemoglobin, gamma G OR #Hs.173030 ESTs, Weakly similar to ALU8_HUMAN ALU SUBFAMILY SX SEQUENCE CONTAMINATION WARNING ENTRY [H.sapiens] | IMAGE:293078	2.24035
HKE2 HLA class II region expressed gene KE2 | IMAGE:298696	2.02244
HLA-DMA major histocompatibility complex, class II, DM alpha | IMAGE:259241	2.1277
HLA-DMB major histocompatibility complex, class II, DM beta | IMAGE:1670937	3.22
HLA-DNA major histocompatibility complex, class II, DN alpha | IMAGE:683914	2.39737
HLA-DPB1 major histocompatibility complex, class II, DP beta 1 | IMAGE:840942	2.44419
HLX1 H2.0 (Drosophila)-like homeo box 1 | IMAGE:1560977	2.24787
HM74 putative chemokine receptor; GTP-binding protein | IMAGE:1130777	2.73909
HNF3G hepatocyte nuclear factor 3, gamma | IMAGE:201288	2.11559
HNRPA1 heterogeneous nuclear ribonucleoprotein A1 | IMAGE:683352	2.18126
HOXB7 homeo box B7 | IMAGE:1434905	2.03638
HPRT1 hypoxanthine phosphoribosyltransferase 1 (Lesch-Nyhan syndrome) | IMAGE:44296	2.09016
HSEC61 #sec61 homolog OR GUCY1A3 #guanylate cyclase 1, soluble, alpha 3 | IMAGE:51011	3.66926
HSPA8 heat shock 70kD protein 8 | IMAGE:884719	2.61263
HSPC065 HSPC065 protein | IMAGE:277003	2.93282
HSPCA #heat shock 90kD protein 1, alpha OR #Hs.193411 ESTs, Weakly similar to T43481 probable mucin DKFZp434C196.1 [H.sapiens] | IMAGE:645259	2.20352
ICAM1 intercellular adhesion molecule 1 (CD54), human rhinovirus receptor | IMAGE:145112	2.36913
ICSBP1 interferon consensus sequence binding protein 1 | IMAGE:2107378	4.51997
IDH3A isocitrate dehydrogenase 3 (NAD+) alpha | IMAGE:263790	2.29473
IFI16 interferon, gamma-inducible protein 16 | IMAGE:824602	2.16814
IFI27 interferon, alpha-inducible protein 27 | IMAGE:588915	3.2925
IFI41 interferon-induced protein 41, 30kD | IMAGE:154493	2.00843
IFITM1 interferon induced transmembrane protein 1 (9-27) | IMAGE:1271427	2.13104
IFRG28 28kD interferon responsive protein | IMAGE:268385	2.25168
IGF2R insulin-like growth factor 2 receptor | IMAGE:79712	2.11836
IGHM immunoglobulin heavy constant mu | IMAGE:214441	2.22545
IGJ immunoglobulin J polypeptide, linker protein for immunoglobulin alpha and mu polypeptides | IMAGE:117806	2.90569
IL15 interleukin 15 | IMAGE:289606	4.48692
IL15RA interleukin 15 receptor, alpha | IMAGE:470251	5.74815
IL18BP interleukin 18 binding protein | IMAGE:449043	3.04559
IL18RAP interleukin 18 receptor accessory protein | IMAGE:2355503	3.81261
IL1A interleukin 1, alpha | IMAGE:1353982	2.02831
IL2RA interleukin 2 receptor, alpha | LCP:88	2.0081
IL6R interleukin 6 receptor | IMAGE:754500	6.12513
IL7 interleukin 7 | IMAGE:2090264	6.32523
IL8RB interleukin 8 receptor, beta | IMAGE:882183	3.11032
INDO indoleamine-pyrrole 2,3 dioxygenase | IMAGE:740925	3.81771
IRF1 interferon regulatory factor 1 | IMAGE:1307246	10.3603
ISG20 interferon stimulated gene (20kD) | IMAGE:1351990	2.2419
ITGA integrin, alpha L (antigen CD11A (p180), lymphocyte function-associated antigen 1; alpha polypeptide) | IMAGE:1338831	2.07085
ITGA4 integrin, alpha 4 (antigen CD49D, alpha 4 subunit of VLA-4 receptor) | IMAGE:1317378	2.72679
ITGB7 integrin, beta 7 | IMAGE:1305655	3.1642
ITK IL2-inducible T-cell kinase | IMAGE:683478	2.06645
JAK2 Janus kinase 2 (a protein tyrosine kinase) | IMAGE:2048524	5.04201
KAR lysyl-tRNA synthetase | IMAGE:842818	2.99928
KBRAS1 I-kappa-B-interacting Ras-like protein 1 | IMAGE:290567	2.77329
KCNJ2 potassium inwardly-rectifying channel, subfamily J, member 2 | IMAGE:320857	2.18135
KEO4 similar to Caenorhabditis elegans protein C42C1.9 | IMAGE:298769	2.82475
KIAA1017 alpha integrin binding protein 63 | IMAGE:814825	2.21325
KIAA1382 amino acid transporter 2 | IMAGE:133454	2.69705
KLF2 Kruppel-like factor 2 (lung) | IMAGE:1670942	2.66469
KLF4 Kruppel-like factor 4 (gut) | IMAGE:1525111	2.39377
KPNA5 karyopherin alpha 5 (importin alpha 6) | IMAGE:2336788	2.02063
KRT13 keratin 13 | IMAGE:342008	2.11002
LCP2 lymphocyte cytosolic protein 2 (SH2 domain-containing leukocyte protein of 76kD) | IMAGE:1415419	2.5068
LGALS3BP lectin, galactoside-binding, soluble, 3 binding protein (galectin 6 binding protein) | IMAGE:811000	4.90145
LIMK1 LIM domain kinase 1 | IMAGE:1086811	2.81268
LIMK2 LIM domain kinase 2 | IMAGE:1160723	4.21469
LIPA lipase A, lysosomal acid, cholesterol esterase (Wolman disease) | IMAGE:1185090	3.56533
LIPC lipase, hepatic | IMAGE:292306	2.31789
LMNB1 lamin B1 | IMAGE:1184257	4.53327
LOC51056 leucine aminopeptidase | IMAGE:141623	6.28741
LOC51299 neuritin | IMAGE:140197	2.62767
LOC51596 divalent cation tolerant protein CUTA | IMAGE:838732	2.10639
LOC51619 ubiquitin-conjugating enzyme HBUCE1 | IMAGE:1574629	3.60441
LOC51667 NY-REN-18 antigen | IMAGE:259169	2.50978
LOC51738 ghrelin precursor | IMAGE:1285455	2.28233
LRP16 LRP16 protein | IMAGE:325380	2.1811
LTBP4 #latent transforming growth factor beta binding protein 4 OR FLJ11296 #likely homolog of mouse immunity-associated nucleotide 4 | IMAGE:491460	2.40376
MAPK9 mitogen-activated protein kinase 9 | IMAGE:322029	5.71719
MAT2B methionine adenosyltransferase II, beta | IMAGE:773260	2.40432
ME1 malic enzyme 1, NADP(+)-dependent, cytosolic | IMAGE:272507	3.35356
MEF2A MADS box transcription enhancer factor 2, polypeptide A (myocyte enhancer factor 2A) | IMAGE:298320	2.2882
MEF2B MADS box transcription enhancer factor 2, polypeptide B (myocyte enhancer factor 2B) | IMAGE:700850	2.36637
MHC2TA MHC class II transactivator | IMAGE:1130479	2.43574
MIG monokine induced by gamma interferon | LCP:8	39.093
MMP17 matrix metalloproteinase 17 (membrane-inserted) | IMAGE:251047	3.05401
MMPL1 matrix metalloproteinase-like 1 | IMAGE:1353302	2.14801
MRF-1 modulator recognition factor I | IMAGE:1391644	2.08711
MRPL23 mitochondrial ribosomal protein L23 | IMAGE:788334	3.10343
MSR1 macrophage scavenger receptor 1 | IMAGE:2354198	3.57727
MTA1 metastasis associated 1 | IMAGE:1671126	2.26271
MTHFD1 methylenetetrahydrofolate dehydrogenase (NADP+ dependent), methenyltetrahydrofolate cyclohydrolase, formyltetrahydrofolate synthetase | IMAGE:152653	4.48931
MTHFD2 methylene tetrahydrofolate dehydrogenase (NAD+ dependent), methenyltetrahydrofolate cyclohydrolase | IMAGE:2014034	2.16645
MUC1 mucin 1, transmembrane | IMAGE:840687	5.09851
MXI1 MAX-interacting protein 1 | IMAGE:26677	5.36602
MYO1C myosin IC | IMAGE:1184506	2.04642
NASP nuclear autoantigenic sperm protein (histone-binding) | IMAGE:2516736	2.0253
NBS1 Nijmegen breakage syndrome 1 (nibrin) | IMAGE:264951	2.21987
NCBP2 nuclear cap binding protein subunit 2, 20kD | IMAGE:1307534	2.15018
NCF1 neutrophil cytosolic factor 1 (47kD, chronic granulomatous disease, autosomal 1) | IMAGE:1251505	2.43804
NDUFA9 NADH dehydrogenase (ubiquinone) 1 alpha subcomplex, 9 (39kD) | IMAGE:897987	2.49045
NEK6 NIMA (never in mitosis gene a)-related kinase 6 | IMAGE:280376	2.36855
NK4 natural killer cell transcript 4 | IMAGE:1355635	2.66818
NME2 non-metastatic cells 2, protein (NM23B) expressed in | IMAGE:1352394	2.19372
NMI N-myc (and STAT) interactor | IMAGE:704532	2.00415
NMP200 nuclear matrix protein NMP200 related to splicing factor PRP19 | IMAGE:2094132	2.32575
NR4A3 nuclear receptor subfamily 4, group A, member 3 | IMAGE:323151	2.30695
NRP2 neuropilin 2 | IMAGE:269354	2.17121
NUP153 nucleoporin 153kD | IMAGE:1289545	2.27497
P2RY6 pyrimidinergic receptor P2Y, G-protein coupled, 6 | IMAGE:452588	3.7142
PDK3 pyruvate dehydrogenase kinase, isoenzyme 3 | IMAGE:1186175	2.13345
PDZ-GEF1 PDZ domain containing guanine nucleotide exchange factor(GEF)1 | IMAGE:824895	2.15242
PFKP phosphofructokinase, platelet | IMAGE:950682	2.21631
PIG3 quinone oxidoreductase homolog | IMAGE:859359	2.16925
PIK3C3 phosphoinositide-3-kinase, class 3 | IMAGE:813536	2.61344
PIM1 pim-1 oncogene | IMAGE:1284522	5.00265
PLECKSTRIN | IMAGE:823779	2.79519
PM promyelocytic leukemia | IMAGE:705046	2.04439
PMAIP1 phorbol-12-myristate-13-acetate-induced protein 1 | IMAGE:713081	2.00029
POLB polymerase (DNA directed), beta | IMAGE:1334745	2.70728
PP pyrophosphatase (inorganic) | IMAGE:950700	2.64053
PROCR protein C receptor, endothelial (EPCR) | IMAGE:71101	2.44431
PRPS2 phosphoribosyl pyrophosphate synthetase 2 | IMAGE:503097	2.66014
PSEN2 presenilin 2 (Alzheimer disease 4) | IMAGE:491232	2.27623
PSMA2 proteasome (prosome, macropain) subunit, alpha type, 2 | IMAGE:155434	2.30853
PSMA4 proteasome (prosome, macropain) subunit, alpha type, 4 | IMAGE:399536	2.17339
PSMA5 proteasome (prosome, macropain) subunit, alpha type, 5 | IMAGE:897952	2.09296
PSMB10 proteasome (prosome, macropain) subunit, beta type, 10 | IMAGE:683334	3.07695
PSMB8 proteasome (prosome, macropain) subunit, beta type, 8 (large multifunctional protease 7) | IMAGE:2066619	3.47655
PSMB9 proteasome (prosome, macropain) subunit, beta type, 9 (large multifunctional protease 2) | IMAGE:1240661	4.37715
PSME1 proteasome (prosome, macropain) activator subunit 1 (PA28 alpha) | IMAGE:684776	2.75902
PSME2 proteasome (prosome, macropain) activator subunit 2 (PA28 beta) | IMAGE:210405	5.76371
PSTPIP2 proline-serine-threonine phosphatase interacting protein 2 | IMAGE:417784	3.9488
PTCH patched (Drosophila) homolog | IMAGE:2020180	3.05822
PTK9 protein tyrosine kinase 9 | IMAGE:685747	2.07085
PTPRC protein tyrosine phosphatase, receptor type, C | IMAGE:2001144	2.21958
PTPRO protein tyrosine phosphatase, receptor type, O | IMAGE:30175	2.13929
PTTG1 pituitary tumor-transforming 1 | IMAGE:2018976	2.06486
RABGGTA Rab geranylgeranyltransferase, alpha subunit | IMAGE:453689	2.32474
RARRES3 retinoic acid receptor responder (tazarotene induced) 3 | IMAGE:324225	9.99722
RB1 retinoblastoma 1 (including osteosarcoma) | IMAGE:682797	2.00593
RCN1 reticulocalbin 1, EF-hand calcium binding domain | IMAGE:613056	3.24828
RFX5 regulatory factor X, 5 (influences HLA class II expression) | IMAGE:2499653	2.74229
RGS6 regulator of G-protein signalling 6 | IMAGE:2567468	4.93943
RNAH RNA helicase family | IMAGE:2398875	2.57516
RNTRE related to the N terminus of tre | IMAGE:711826	2.02618
RPL5 ribosomal protein L5 | IMAGE:469235	2.13066
RPS9 ribosomal protein S9 | IMAGE:1087015	2.16112
RRP22 RAS-related on chromsome 22 | IMAGE:2244579	2.52909
RRP46 exosome component Rrp46 | IMAGE:1300230	3.17727
SCYA13 small inducible cytokine subfamily A (Cys-Cys), member 13 | IMAGE:80146	4.93349
SCYA19 small inducible cytokine subfamily A (Cys-Cys), member 19 | IMAGE:300411	2.3903
SCYA8 small inducible cytokine subfamily A (Cys-Cys), member 8 (monocyte chemotactic protein 2) | IMAGE:1911099	3.80574
SCYB10 small inducible cytokine subfamily B (Cys-X-Cys), member 10 | IMAGE:967284	13.5129
SCYB11 small inducible cytokine subfamily B (Cys-X-Cys), member 11 | IMAGE:1030351	32.4093
SERPINB7 serine (or cysteine) proteinase inhibitor, clade B (ovalbumin), member 7 | IMAGE:1509935	2.20153
SERPINE1 serine (or cysteine) proteinase inhibitor, clade E (nexin, plasminogen activator inhibitor type 1), member 1 | IMAGE:244307	2.58097
SERPING1 serine (or cysteine) proteinase inhibitor, clade G (C1 inhibitor), member 1 | IMAGE:2541441	17.1744
SFTPA2 surfactant, pulmonary-associated protein A2 | IMAGE:841507	2.05101
SFTPB surfactant, pulmonary-associated protein B | IMAGE:1584551	2.13737
SIAT9 sialyltransferase 9 (CMP-NeuAc:lactosylceramide alpha-2,3-sialyltransferase; GM3 synthase) | IMAGE:1722146	3.0726
SIVA CD27-binding (Siva) protein | IMAGE:632137	2.13784
SLC1A5 solute carrier family 1 (neutral amino acid transporter), member 5 | IMAGE:2491434	5.94303
SLC2A3 solute carrier family 2 (facilitated glucose transporter), member 3 | IMAGE:259029	2.32057
SLC6A12 solute carrier family 6 (neurotransmitter transporter, betaine/GABA), member 12 | IMAGE:282501	4.22789
SMARCA1 SWI/SNF related, matrix associated, actin dependent regulator of chromatin, subfamily a, member 1 | IMAGE:897667	2.22664
SMARCA2 SWI/SNF related, matrix associated, actin dependent regulator of chromatin, subfamily a, member 2 | IMAGE:713272	2.0755
SNX17 sorting nexin 17 | IMAGE:1283207	2.55901
SNX8 #sorting nexin 8 OR NEB #nebulin | IMAGE:366585	2.28693
SP140 nuclear body protein Sp140 | IMAGE:1372597	2.08891
SPS2 selenophosphate synthetase 2 | IMAGE:2326168	2.24424
SRM spermidine synthase | IMAGE:856796	2.09077
SRM300 RNA binding protein; AT-rich element binding factor | IMAGE:489453	11.3854
SSA1 Sjogren syndrome antigen A1 (52kD, ribonucleoprotein autoantigen SS-A/Ro) | IMAGE:282956	2.05923
SSI-1 JAK binding protein | IMAGE:1319238	20.2227
ST5 #suppression of tumorigenicity 5 OR KIAA0554 #KIAA0554 protein | IMAGE:785907	2.05584
STAF50 stimulated trans-acting factor (50 kDa) | IMAGE:1241157	2.22481
STAT1 signal transducer and activator of transcription 1, 91kD | IMAGE:1272694	5.84287
STAT2 signal transducer and activator of transcription 2, 113kD | IMAGE:1552554	2.59199
STK12 serine/threonine kinase 12 | IMAGE:241029	2.0184
STX11 syntaxin 11 | IMAGE:136223	2.54958
SULT2A1 sulfotransferase family, cytosolic, 2A, dehydroepiandrosterone (DHEA) -preferring, member 1 | IMAGE:1342650	2.00245
SUPT3H suppressor of Ty (S.cerevisiae) 3 homolog | IMAGE:683517	2.5076
TAO1 thousand and one amino acid protein kinase | IMAGE:1303720	2.52953
TAP1 transporter 1, ATP-binding cassette, sub-family B (MDR/TAP) | IMAGE:1925995	4.5612
TAP2 transporter 2, ATP-binding cassette, sub-family B (MDR/TAP) | IMAGE:1354020	3.99157
TAPBP TAP binding protein (tapasin) | IMAGE:452314	2.0804
TBX21 T-box 21 | IMAGE:2073364	2.25742
TGFB1 transforming growth factor, beta 1 | IMAGE:589749	2.04886
TLR7 toll-like receptor 7 | IMAGE:1309296	3.15978
TMSB10 thymosin, beta 10 | IMAGE:840788	2.52197
TNF tumor necrosis factor (TNF superfamily, member 2) | IMAGE:1317148	2.39712
TNFAIP2 tumor necrosis factor, alpha-induced protein 2 | IMAGE:810444	2.20955
TNFRSF5 #tumor necrosis factor receptor superfamily, member 5 OR #Hs.293960 ESTs | IMAGE:261519	4.84047
TNFRSF6 tumor necrosis factor receptor superfamily, member 6 | IMAGE:1235120	3.09413
TNFSF10 tumor necrosis factor (ligand) superfamily, member 10 | IMAGE:1251947	5.74367
TRG@ T cell receptor gamma locus | IMAGE:1071266	2.87934
TULP1 tubby like protein 1 | IMAGE:2106998	2.86144
TUSP #tubby super-family protein OR HSPE1 #heat shock 10kD protein 1 (chaperonin 10) | IMAGE:781341	2.13319
UBD diubiquitin | IMAGE:243741	7.35981
UBE2E2 ubiquitin-conjugating enzyme E2E 2 (homologous to yeast UBC4/5) | IMAGE:795197	2.26097
UBE2L6 ubiquitin-conjugating enzyme E2L 6 | IMAGE:2568695	5.41591
UBE3A ubiquitin protein ligase E3A (human papilloma virus E6-associated protein, Angelman syndrome) | IMAGE:2021679	14.8149
UNC93B unc93 (C.elegans) homolog B | IMAGE:1670870	2.19691
UNG uracil-DNA glycosylase | IMAGE:2507005	2.35566
USP25 ubiquitin specific protease 25 | IMAGE:824710	2.22466
VAMP5 vesicle-associated membrane protein 5 (myobrevin) | IMAGE:2021678	17.4135
VARS2 valyl-tRNA synthetase 2 | IMAGE:526465	2.16423
WARS tryptophanyl-tRNA synthetase | IMAGE:1647972	10.7948
ZFP36 zinc finger protein homologous to Zfp-36 in mouse | IMAGE:727266	2.0727
