# Supplementary material for: Dissecting Interferon-Induced Transcriptional Programs in Human Peripheral Blood Cells
Source: PLoS One. 2010 Mar 22;5(3):e9753. doi: 10.1371/journal.pone.0009753 (PMC2842296; doi:10.1371/journal.pone.0009753)
Supplement: Table S7 — The temporal transcriptional response of monocytes to 0.6 pM IFNγ. The significantly differentially expressed genes (determined using the SAM algorithm, minimum 2 fold cutoff at a false discovery rate of <1% of the median), and sampled at 0.5, 1, 4, 8, 12 and 24 h post IFNγ treatment, were separated into 7 significantly represented profiles using STEM. The table is ordered by STEM profile (as illustrated in Figure 4a), then alphabetically using gene annotation from Source [70]. (0.07 MB XLS) [file pone.0009753.s009.xls]

## Sheet: Monocyte response to IFNg
Table S6 (Waddell et al.)
363 genes significantly differentially expressed by 0.6 pM IFNg treatment in a purified human monocyte population separated into 7 significantly represented profiles using STEM. Log2 expression ratios relative to untreated T0 detailed.
Source Gene ID	Fig4a Profile	Fig4b Colouring	Profile Description	Profile ID	0h	0.5h	1h	4h	8h	12h	24h
CCL19	A	Dark red	Induced to peak at 1h then repressed	95	0	1.16	1.81	-0.21	0.58	-0.25	-0.74
CD69	A	Dark red	Induced to peak at 1h then repressed	95	0	4.19	4.67	1.57	1.25	0.89	0.23
CDKN1A	A	Dark red	Induced to peak at 1h then repressed	95	0	1.89	2.32	1.08	1.03	0.85	-0.01
DLEU1	A	Dark red	Induced to peak at 1h then repressed	95	0	1.82	2.15	0.56	0.11	0.32	-0.33
DUSP5	A	Dark red	Induced to peak at 1h then repressed	95	0	1.69	1.43	0.46	0.35	-0.01	-0.63
EPAS1	A	Dark red	Induced to peak at 1h then repressed	95	0	0.59	0.66	0.56	-0.01	-0.33	-0.85
ICAM1	A	Dark red	Induced to peak at 1h then repressed	95	0	1.87	2.71	0.85	0.31	0.41	-0.14
MEF2A	A	Dark red	Induced to peak at 1h then repressed	95	0	1.57	1.74	0.44	0.53	0.44	0.11
NIACR1	A	Dark red	Induced to peak at 1h then repressed	95	0	1.74	1.88	0.54	0.53	0.37	-0.6
RPS9	A	Dark red	Induced to peak at 1h then repressed	95	0	1.57	1.91	0.43	0.74	-0.03	-0.44
SERPINB7	A	Dark red	Induced to peak at 1h then repressed	95	0	1.52	1.75	0.51	0.9	0.29	-0.4
SFTPB	A	Dark red	Induced to peak at 1h then repressed	95	0	1.12		0.68	0.43	0.4	-0.28
SMARCA2	A	Dark red	Induced to peak at 1h then repressed	95	0	0.25	1.11	0.41	0.61	0.17	-0.77
ZFP36	A	Dark red	Induced to peak at 1h then repressed	95	0	1.86	1.63	0.42	0	-0.09	-0.38
AK3	B	Dark red	Induced peak at 1h remains induced	98	0	1.49	2.32	0.71	0.23	0.51	-0.08
BATF	B	Dark red	Induced peak at 1h remains induced	98	0	1.46	2.39	0.9	1.23	1.43	1.47
BCL6	B	Dark red	Induced peak at 1h remains induced	98	0	1.37	2.31	1.28	1.28	1.47	1.11
CISH	B	Dark red	Induced peak at 1h remains induced	98	0	2.37	3.24	1.5	0.9	1.48	1.6
ERLIN1	B	Dark red	Induced peak at 1h remains induced	98	0	1.84	2.84	1.66	1.88	2.31	2.08
IGJ	B	Dark red	Induced peak at 1h remains induced	98	0	1.62	2.66	1.61	2.03	1.77	1.38
IL1A	B	Dark red	Induced peak at 1h remains induced	98	0	1.19	1.93	1.01	0.81	0.97	0.69
IL6R	B	Dark red	Induced peak at 1h remains induced	98	0	1.73	4.25	1.82	2.21	2.78	1.25
NKIRAS1	B	Dark red	Induced peak at 1h remains induced	98	0	0.98	3.53	0.92	1.02	0.84	0.73
NR4A3	B	Dark red	Induced peak at 1h remains induced	98	0	1.7	3.06	0.52	0.43	0.59	0.04
PLEK	B	Dark red	Induced peak at 1h remains induced	98	0	1.99	2.38	1.19	1.45	1.51	1.03
RGS6	B	Dark red	Induced peak at 1h remains induced	98	0	2.41	4.14	2.2	2.44	2.34	2.11
RHOH	B	Dark red	Induced peak at 1h remains induced	98	0	1.34	3.2	1	1.14	1.12	0.97
SEPHS2	B	Dark red	Induced peak at 1h remains induced	98	0	1.98	2.8	1.14	0.81	1.3	0.91
SNX17	B	Dark red	Induced peak at 1h remains induced	98	0	1.98	2.32	0.97	1.23	1.17	1.46
TWF1	B	Dark red	Induced peak at 1h remains induced	98	0	1.5	1.86	0.52	0.31	0.38	0.31
CD226	C	Dark red	Induced quickly remains high	99	0	1.23	2.24	2.45	1.76	2.45	2.13
CDKN3	C	Dark red	Induced quickly remains high	99	0	0.73	0.78	1.26	1	0.84	0.66
CLCN3	C	Dark red	Induced quickly remains high	99	0	1	1.28	2	1.99	1.72	1.69
CXCL10	C	Dark red	Induced quickly remains high	99	0	4.26	3.85	3.65	3.92	3.73	3.74
ENPP2	C	Dark red	Induced quickly remains high	99	0		2.95	2.74	2.82	3.41	3.57
FCGR1A	C	Dark red	Induced quickly remains high	99	0	2.26	2.89	3.21	3.36	3.68	3.22
GBP2	C	Dark red	Induced quickly remains high	99	0	1.68	2.46	3.69	3.56	3.29	2.78
HOXB7	C	Dark red	Induced quickly remains high	99	0	0.57	1.57	1.28	1.25	1.29	2.02
IRF1	C	Dark red	Induced quickly remains high	99	0	3.1	3.48	3.13	2.86	2.74	2.69
IRF8	C	Dark red	Induced quickly remains high	99	0	1.7	2.96	3.16	3.43	2.97	2.86
KLF4	C	Dark red	Induced quickly remains high	99	0	1.31	1.91	1.89	1.46	1.81	1.92
KPNA5	C	Dark red	Induced quickly remains high	99	0	0.67	0.96	1.74	1.33	1.35	1.02
LTBP4	C	Dark red	Induced quickly remains high	99	0	1.03	1.87	2.12	2.67	2.07	2.4
MSR1	C	Dark red	Induced quickly remains high	99	0	1.51	2.07	2.9	2.81	3.06	2.38
MTHFD2	C	Dark red	Induced quickly remains high	99	0	0.38	1.11	1.18	1.35	1.07	0.8
SMARCA1	C	Dark red	Induced quickly remains high	99	0	0.32	1.96	1.6	2.08	1.52	2.15
SOCS1	C	Dark red	Induced quickly remains high	99	0	3.1	4.17	3.94	3.81	3.91	3.67
TRG	C	Dark red	Induced quickly remains high	99	0	1.2	1.9	1.71	1.47	1.52	1.27
TULP1	C	Dark red	Induced quickly remains high	99	0	1.19	1.98	2.5	1.75	2.06	2.82
USP6NL	C	Dark red	Induced quickly remains high	99	0	0.66	1.29	1.86	1.31	1.45	0.94
APOL1	D	Light Red	Induced peak at 4h	55	0	-0.68	-1.02	2.03	1.23	1.37	2.18
APOL3	D	Light Red	Induced peak at 4h	55	0	0.16	1.3	3.97	3.51	3.99	2.8
ASCC3	D	Light Red	Induced peak at 4h	55	0	0.34	0.33	2.07	2.1	2.11	1.35
ASPHD2	D	Light Red	Induced peak at 4h	55	0	-0.18	-0.28	2.18	2.32	2.31	1.82
BRCA1	D	Light Red	Induced peak at 4h	55	0	-0.58	-0.22	2.31	2.25	1.71	1.5
CCDC113	D	Light Red	Induced peak at 4h	55	0	-0.55	0.7	1.86	2.16	1.72	1.6
CD97	D	Light Red	Induced peak at 4h	55	0	-0.1	0.16	1.74	1.32	1.23	1.01
CDC25B	D	Light Red	Induced peak at 4h	55	0	0.02	0.08	2.66	2.73	2.37	1.87
CHKA	D	Light Red	Induced peak at 4h	55	0	-0.18	0.83	2.71	2.74	2.74	2.28
CIITA	D	Light Red	Induced peak at 4h	55	0	-0.35	0.21	2.09	2.01	2.05	1.64
CSE1L	D	Light Red	Induced peak at 4h	55	0	0.22	0.94	2.22	2.4	2.12	1.93
CUTA	D	Light Red	Induced peak at 4h	55	0	0.2	0.48	1.66	1.63	1.83	1.29
DECR1	D	Light Red	Induced peak at 4h	55	0	0.77	0.63	1.94	2.08	2	1.42
EDN1	D	Light Red	Induced peak at 4h	55	0	0.06	-0.01	2.26	2.44	2.31	1.26
FYB	D	Light Red	Induced peak at 4h	55	0	0.48	0.46	2.1	1.77	1.53	1.45
GCLC	D	Light Red	Induced peak at 4h	55	0	-0.02	-0.01	1.76	1.78	1.24	1.04
GCNT1	D	Light Red	Induced peak at 4h	55	0	-0.04	0.44	4.06	4.34	4.17	4.21
HBG2	D	Light Red	Induced peak at 4h	55	0	0.4	0.83	1.85	1.92	1.79	1.44
HNRNPA1	D	Light Red	Induced peak at 4h	55	0	0.15	0.25	1.52	1.41	1.17	0.86
HSPA8	D	Light Red	Induced peak at 4h	55	0	0.27	0.59	2.01	2.21	2.09	1.47
IDO1	D	Light Red	Induced peak at 4h	55	0	0.23	-0.09	2.07	2.43	1.99	2.04
IL15	D	Light Red	Induced peak at 4h	55	0	0.13	0.81	2.83	2.82	2.8	2.06
IL15RA	D	Light Red	Induced peak at 4h	55	0	0.4	1.08	3.5	3.66	3.32	2.74
ITK	D	Light Red	Induced peak at 4h	55	0	0.76	0.26	1.66	1.71	1.61	1.2
JAK2	D	Light Red	Induced peak at 4h	55	0	0.09	0.25	3.17	2.76	2.94	2.5
KARS	D	Light Red	Induced peak at 4h	55	0	0.9	1.07	2.39	2.43	2.53	1.79
KAT2A	D	Light Red	Induced peak at 4h	55	0	0.3	-0.12	1.22	1.22	1.18	0.57
LIMK1	D	Light Red	Induced peak at 4h	55	0		0.46	2.54	2.66	2.48	2.14
MACROD1	D	Light Red	Induced peak at 4h	55	0	-0.39	0.02		1.04	0.99	0.59
ME1	D	Light Red	Induced peak at 4h	55	0	0.74	0.76	3.04	3.35	3	2.55
MEF2B	D	Light Red	Induced peak at 4h	55	0	-0.08	0	1.38	1.23	1.52	1.13
MMP17	D	Light Red	Induced peak at 4h	55	0	0.77	0.7	2.67	2.8	2.54	2.04
MYOF	D	Light Red	Induced peak at 4h	55	0	0.02	0.69	1.53	2.23	2.01	1.41
NRP2	D	Light Red	Induced peak at 4h	55	0	0.62	1.37	2.25	2.22	2.22	1.77
NUB1	D	Light Red	Induced peak at 4h	55	0	0.08	-0.1	1.74	1.75	1.44	1.25
PFKP	D	Light Red	Induced peak at 4h	55	0	0.33	0.35	1.3	1.73	1.44	0.75
PIK3C3	D	Light Red	Induced peak at 4h	55	0	0.15	0.48	1.99	2.32	2.27	1.42
PML	D	Light Red	Induced peak at 4h	55	0	-0.76	0.1	1.48	1.55	1.42	0.76
POLB	D	Light Red	Induced peak at 4h	55	0	0.22	0.02	2.48	2.43	2.38	1.8
PSMA5	D	Light Red	Induced peak at 4h	55	0	0.34	0.47	1.11	1.12	1.21	0.56
PSMB10	D	Light Red	Induced peak at 4h	55	0	-0.34	-0.38	1.61	1.82	1.74	1.78
PSMB9	D	Light Red	Induced peak at 4h	55	0	0.25	1.06	2.74	2.74	2.68	2.44
RCN1	D	Light Red	Induced peak at 4h	55	0	0.16	0.14	2.06	2.16	2.1	1.76
RTP4	D	Light Red	Induced peak at 4h	55	0	-0.44	0.78	1.72	1.86	1.57	1.47
SP140	D	Light Red	Induced peak at 4h	55	0	-0.36	0.08	1.6	1.3	1.16	0.87
SRRM2	D	Light Red	Induced peak at 4h	55	0	-0.5	0.37	3.4	3.24	3.4	2.55
ST3GAL5	D	Light Red	Induced peak at 4h	55	0	-0.27	0.06	1.9	1.9	1.97	1.87
STAT2	D	Light Red	Induced peak at 4h	55	0	-0.3	0.03	1.48	1.38	0.81	1.27
STOM	D	Light Red	Induced peak at 4h	55	0	0.39	0.85	2.45	2.8	2.4	2.16
SUPT3H	D	Light Red	Induced peak at 4h	55	0	-0.23	0.62	2.04	1.68	1.36	0.65
TAP1	D	Light Red	Induced peak at 4h	55	0	0.67	1.7	2.6	2.41	2.26	1.87
TAP2	D	Light Red	Induced peak at 4h	55	0	-0.01	0.31	2.12	2.34	2.15	0.62
TNFAIP2	D	Light Red	Induced peak at 4h	55	0	0.01	0.72	1.28	1.14	1.1	0.78
TNFSF10	D	Light Red	Induced peak at 4h	55	0	0.13	1.87	4.12	4.85	4.04	3.76
TRIM22	D	Light Red	Induced peak at 4h	55	0	-0.03	0.69	1.73	1.76	1.76	1.55
UBE2D4	D	Light Red	Induced peak at 4h	55	0	-0.49	0.46	1.99	2.47	2.05	1.7
UBE2L6	D	Light Red	Induced peak at 4h	55	0	0.11	1.07	3.28	3.37	3.19	2.8
WARS	D	Light Red	Induced peak at 4h	55	0	0.22	0.91	3.38	3.98	3.85	2.72
BTN3A3	E	Light Red	Delayed induction peak at 8h	46	0	0.29	0.08	1.82	2.48	2.68	2.11
CD36	E	Light Red	Delayed induction peak at 8h	46	0	0.37	0.51	1.98	3.65	2.7	1.76
IGHM	E	Light Red	Delayed induction peak at 8h	46	0	-0.11	-0.12	0.87	1.5	1.33	0.75
IL32	E	Light Red	Delayed induction peak at 8h	46	0	0.29	-0.15	0.64	1.79	2.63	1.83
ISG20	E	Light Red	Delayed induction peak at 8h	46	0	-0.68	-0.28	0.74	1.84	1.22	0.58
ITGAL	E	Light Red	Delayed induction peak at 8h	46	0	0.18	-0.01	0.8	1.42	1.59	0.99
ITGB7	E	Light Red	Delayed induction peak at 8h	46	0	-0.09	-0.03	1.36	2.43	2.54	2.11
MPZL2	E	Light Red	Delayed induction peak at 8h	46	0	0.4	0.06	1.97	3.16	3.1	2.75
MYO1C	E	Light Red	Delayed induction peak at 8h	46	0	0.73	0.63	1.43	2.01	1.92	1.06
NCF1	E	Light Red	Delayed induction peak at 8h	46	0	-0.21	-1.01	1.16	1.39	1.7	1.44
PFDN6	E	Light Red	Delayed induction peak at 8h	46	0	-0.3	-0.02	0.64	1.16	1.31	0.57
PSEN2	E	Light Red	Delayed induction peak at 8h	46	0	0.94	0.73	2.29	2.88	2.8	2.02
PSME1	E	Light Red	Delayed induction peak at 8h	46	0	0.33	0.08	0.89	1.74	1.8	1.22
PSME2	E	Light Red	Delayed induction peak at 8h	46	0	-0.58	-0.2	2.2	3.09	2.75	2.3
PTPRO	E	Light Red	Delayed induction peak at 8h	46	0	-0.53	-0.56	0.64	1.53	1.33	0.94
SLAMF7	E	Light Red	Delayed induction peak at 8h	46	0	0.95	0.64	2.43	3.42	3.37	1.87
ABCE1	F	Pink	Induced steadily throughout	81	0	0.69	0.8	0.92	1.57	2.05	1.65
AIM2	F	Pink	Induced steadily throughout	81	0	0.13	0.88	2.31	3.06	3.34	3.1
AKAP7	F	Pink	Induced steadily throughout	81	0	-0.03	0.43	1.58	0.95	1.34	1.79
ALAS1	F	Pink	Induced steadily throughout	81	0	0.57	0.86	0.99	1.76	2.12	1.56
ALDH1A1	F	Pink	Induced steadily throughout	81	0	0.62	0.65	1.22	2.57	3.03	3.89
ARL2	F	Pink	Induced steadily throughout	81	0	0.09	0.31	1.21	1.68	1.47	1.73
ASAP2	F	Pink	Induced steadily throughout	81	0	0.71	0.27	1.85		1.99	2.16
ASPH	F	Pink	Induced steadily throughout	81	0	-0.15	0.37	2.31	2.43	2.45	2.42
AURKB	F	Pink	Induced steadily throughout	81	0	0.32	1.65	1.39	1.58	1.72	2.06
BACE1	F	Pink	Induced steadily throughout	81	0	0.4	1.5	1.37	1.58	1.39	2.35
BHLHE41	F	Pink	Induced steadily throughout	81	0	0.47	0.54	2.48	2.31	2.77	2.23
C2	F	Pink	Induced steadily throughout	81	0	-0.39	1.11	2.88	4.37	4.87	4.99
C4A	F	Pink	Induced steadily throughout	81	0	0.29	0.36	1.72	2.22	2.79	2.82
CAMK2D	F	Pink	Induced steadily throughout	81	0	-0.09	0.66	0.96	1.25	1.7	2.12
CASP10	F	Pink	Induced steadily throughout	81	0	0.29	1.12	1.3	1.44	1.49	1.34
CBR1	F	Pink	Induced steadily throughout	81	0	-0.12	0.07	2.5	3.17	3.3	2.94
CCND2	F	Pink	Induced steadily throughout	81	0	0.43	1.72	2.27	2.16	2.64	2.24
CD38	F	Pink	Induced steadily throughout	81	0	-0.49	-0.49	1.76	3.68	4.5	4.33
CD40	F	Pink	Induced steadily throughout	81	0	0.36	0.59	2.4	2.78	2.78	2.37
CEBPA	F	Pink	Induced steadily throughout	81	0	-0.16	0.3	2.24	2.24	2.57	2.43
CFB	F	Pink	Induced steadily throughout	81	0	0.25	0.07	0.97	2.62	3.45	3.24
CHN1	F	Pink	Induced steadily throughout	81	0	-0.02	1.69	1.4	0.89	1.62	2.1
CMAH	F	Pink	Induced steadily throughout	81	0	0.34	1.74	2	2.52	3.04	2.9
CNR2	F	Pink	Induced steadily throughout	81	0	0.67	0.82	1.92	2.09	2.11	1.87
COL16A1	F	Pink	Induced steadily throughout	81	0	0.02	0.31	2.31	2.53	2.78	2.58
CRLF1	F	Pink	Induced steadily throughout	81	0	0.6	1.81	2.2	2.92	2.91	2.14
CS	F	Pink	Induced steadily throughout	81	0	-0.05	-0.45	1.27	1.25	1.51	2.76
CSNK1D	F	Pink	Induced steadily throughout	81	0	0.03	1.09	1.77	2.69	2.64	2.88
CTSO	F	Pink	Induced steadily throughout	81	0	0.64	0.62	1.35	0.97	2.49	2.22
CXCL11	F	Pink	Induced steadily throughout	81	0	1.36	2.9	5.23	6.26	6.31	5.17
CXCL9	F	Pink	Induced steadily throughout	81	0	1.73	3.48	4.92	5.03	5.13	4.65
DYSF	F	Pink	Induced steadily throughout	81	0	0.86	0.38	1.49	3.19	3.14	3.38
EPB41	F	Pink	Induced steadily throughout	81	0	0.33	1.22	2.13	1.76	1.85	2.92
ESR1	F	Pink	Induced steadily throughout	81	0	-0.84	0.33	0.74	1.27	1.93	2.24
ETV4	F	Pink	Induced steadily throughout	81	0	0.63	2.12	2.85	2.72	2.9	2.73
EXOSC5	F	Pink	Induced steadily throughout	81	0	-0.05	0.16	0.02	1.44	2.38	2.81
F8	F	Pink	Induced steadily throughout	81	0	1.08	2.05	2.83	2.82	3.06	2.42
FANCA	F	Pink	Induced steadily throughout	81	0	0.54	0.69	1.04	1.44	1.81	1.7
FAS	F	Pink	Induced steadily throughout	81	0	0.45	1.64	2.25	2.2	2.43	1.93
FECH	F	Pink	Induced steadily throughout	81	0	0.42	-0.13	1.43	1.87	2.45	2.43
FGL2	F	Pink	Induced steadily throughout	81	0	0.06	0.07	1.95	2.56	2.78	2.86
GBP1	F	Pink	Induced steadily throughout	81	0	1.13	3.48	4.34	4.68	4.33	4.25
GCH1	F	Pink	Induced steadily throughout	81	0	0.12	0.06	2.04	1.84	2.26	1.91
GLS	F	Pink	Induced steadily throughout	81	0	0.8	1.17	2.26	2.08	2.4	2.04
GUCY1A3	F	Pink	Induced steadily throughout	81	0	-0.1	0.15	1.96	2.37	2.56	2.44
GYPC	F	Pink	Induced steadily throughout	81	0	-0.35	0.52	1.08	1.75	2.11	1.61
HLA-DMA	F	Pink	Induced steadily throughout	81	0	0.47	0.28	2	2.81	3.38	3.43
HLA-DMB	F	Pink	Induced steadily throughout	81	0	-0.05	0.56	2.62	3.15	3.09	3.56
HLA-DOA	F	Pink	Induced steadily throughout	81	0	-0.1	0.19	0.8	1.93	2.15	2.12
HLA-DPB1	F	Pink	Induced steadily throughout	81	0	-0.06	0.39	1.3	2.27	2.03	2.1
HPS5	F	Pink	Induced steadily throughout	81	0	0.64	0.65	1.08	0.87	1.38	1.44
HSP90AA1	F	Pink	Induced steadily throughout	81	0	0.36	0.73	1.56	1.78	2.14	1.91
IDH3A	F	Pink	Induced steadily throughout	81	0	0.3	0.26	0.56	1.31	1.81	1.47
IFI27	F	Pink	Induced steadily throughout	81	0	-0.69	-0.56	0.81	2.78	2.88	3.66
IL18BP	F	Pink	Induced steadily throughout	81	0	0.82	0.83	3.06	3.16	3.93	3.47
IL18RAP	F	Pink	Induced steadily throughout	81	0	-0.18	0.82	3.05	2.96	2.84	3.02
IL8RB	F	Pink	Induced steadily throughout	81	0	-0.24	0.08	1.69	1.36	2.13	2.41
ITGA4	F	Pink	Induced steadily throughout	81	0	0.3	0.32	1.57	1.44	1.74	1.92
LAP3	F	Pink	Induced steadily throughout	81	0	0.44	2.09	3.39	3.51	3.28	3.3
LGALS3BP	F	Pink	Induced steadily throughout	81	0	0.36	-0.11	1.58	2.86	3.55	4.23
LIPA	F	Pink	Induced steadily throughout	81	0	0.59	0.39	3.08	4.21	5.25	4.65
LMNB1	F	Pink	Induced steadily throughout	81	0	0.02	1.08	2.55	2.1	2.26	2.33
MEGF9	F	Pink	Induced steadily throughout	81	0	-0.12	-0.09	1.2	1.12	1.5	1.47
MMP25	F	Pink	Induced steadily throughout	81	0	0.26	0.89	1.33	0.71	1.2	1.6
MTA1	F	Pink	Induced steadily throughout	81	0	-0.54	0.32	0.8	0.31	0.97	1.17
MTHFD1	F	Pink	Induced steadily throughout	81	0	0.07	0.47	1.68	3.35	3.97	3.58
MUC1	F	Pink	Induced steadily throughout	81	0	-0.51	1.23	1.93	2.86	3.13	2.4
MXI1	F	Pink	Induced steadily throughout	81	0	1.19	0.77	3.98	4.1	4.17	4.86
NDUFA9	F	Pink	Induced steadily throughout	81	0	0.7	0.93	1.85	1.62	1.67	1.84
NEK6	F	Pink	Induced steadily throughout	81	0	-0.12	0.45	1.61	2.1	2.05	1.97
NME2	F	Pink	Induced steadily throughout	81	0	0.27	0.5	0.02	1.01	1.52	1.78
P2RY6	F	Pink	Induced steadily throughout	81	0	-0.25	-0.42	2.22	2.13	2.78	2.51
PDK3	F	Pink	Induced steadily throughout	81	0	0.41	0.36	1.71	2.11	2.21	2.01
PPA1	F	Pink	Induced steadily throughout	81	0	-0.08	0.67	1.38	1.82	2.35	1.81
PRPF19	F	Pink	Induced steadily throughout	81	0	-0.4	0.85	1.11	1.79	1.85	1.88
PRPS2	F	Pink	Induced steadily throughout	81	0	0.53	1.33	2.61	2.83	3.15	3.02
PSMB8	F	Pink	Induced steadily throughout	81	0	0.29	1.09	1.8	1.83	2.09	1.91
PSTPIP2	F	Pink	Induced steadily throughout	81	0	0.78	1.63	2.88	2.31	2.82	2.7
PTCH1	F	Pink	Induced steadily throughout	81	0	0.06	0.6	1.81	2.01	2.27	2.11
PTTG1	F	Pink	Induced steadily throughout	81	0	1.03	1.01	1.43	1.68	1.92	1.62
RABGGTA	F	Pink	Induced steadily throughout	81	0	0.49	0.11	1.28	1.97	1.99	1.9
RARRES3	F	Pink	Induced steadily throughout	81	0	-0.35	0.49	2.86	3.44	3.5	3.6
RASL10A	F	Pink	Induced steadily throughout	81	0	0.19	0.03	1.81	1.87	2.02	2.25
RFX5	F	Pink	Induced steadily throughout	81	0	0.01	0.4	2.51	2.83	3.23	2.7
RPL5	F	Pink	Induced steadily throughout	81	0	0.61	0.09	1.04	1.32	1.6	1.39
SERPING1	F	Pink	Induced steadily throughout	81	0	0.53	3.53	5.7	6.62	6.58	6.85
SLC1A5	F	Pink	Induced steadily throughout	81	0	0.28	0.06	2.4	3.66	3.91	3.48
SLC2A3	F	Pink	Induced steadily throughout	81	0	-0.12	0.17	1.3	2.04	1.99	2.02
SLC6A12	F	Pink	Induced steadily throughout	81	0	-0.13	0.37	1.4	2.5	3.38	3.22
SNX8	F	Pink	Induced steadily throughout	81	0	0.26	0.71	1.32	1.46	1.45	1.13
STAT1	F	Pink	Induced steadily throughout	81	0	-0.16	1.41	2.92	2.82	3.21	2.87
TAOK2	F	Pink	Induced steadily throughout	81	0	0.32	0.92	0.99	1.73	2.07	1.46
TAPBP	F	Pink	Induced steadily throughout	81	0	0.36	0.08	0.88	1.27	1.08	1.2
TLR7	F	Pink	Induced steadily throughout	81	0	0.27	0.9	2.81	3.34	3.81	3.96
TMSB10	F	Pink	Induced steadily throughout	81	0	-0.53	0.01	1.22	2.24	2.16	2.01
TULP4	F	Pink	Induced steadily throughout	81	0	1.18	0.47	1.43	2.33	2.69	2.3
UBD	F	Pink	Induced steadily throughout	81	0	0.55	1.49	3.65	4.21	4.44	3.28
UBE2E2	F	Pink	Induced steadily throughout	81	0	0.45	0.56	1.14	1.78	1.97	1.79
UBE3A	F	Pink	Induced steadily throughout	81	0	1.08	2.24		5.53	5.35	5.26
USP25	F	Pink	Induced steadily throughout	81	0	0.38	0.38	1.18	0.75	1.28	1.37
VAMP5	F	Pink	Induced steadily throughout	81	0	1.12	2.19	5.14	5.56	5.38	5.04
VARS2	F	Pink	Induced steadily throughout	81	0	-0.31	0.11	0.67	1.28	1.8	2.04
ADM	G	Blue	Repressed with time	20	0	-0.37	-0.04	-1.32	-2.1	-2.94	-2.99
ANXA6	G	Blue	Repressed with time	20	0	-0.66	-0.9	-1.83	-2.1	-2.41	-2.4
ARL4C	G	Blue	Repressed with time	20	0	-0.38	-0.82	-1.18	-1.92	-1.84	-1.57
BTG1	G	Blue	Repressed with time	20	0	-0.04	-0.85	-2.33	-2.19	-2.19	-2.85
CXCL1	G	Blue	Repressed with time	20	0	-0.57	-0.95	-2.3	-3.37	-4.78	-4.45
CXCL2	G	Blue	Repressed with time	20	0	-0.59	-1.02	-2.4	-3.58	-4.03	-4.14
CXCL3	G	Blue	Repressed with time	20	0	-0.53	-1.74	-3.14	-4.48	-4.95	-4.52
DGKA	G	Blue	Repressed with time	20	0	-0.34	-0.26	-1.62	-1.62	-2.01	-2.3
DGKD	G	Blue	Repressed with time	20	0	-0.41	-0.37	-1.15	-1.23	-1.4	-1.43
DUSP1	G	Blue	Repressed with time	20	0	-1.85	-0.58	-1.58	-2.51	-2.81	-3.34
EREG	G	Blue	Repressed with time	20	0	0.29	-1.44	-4.03	-4.6	-4.93	-4.94
FLRT2	G	Blue	Repressed with time	20	0	0.28	-0.19	-2.25	-4.09	-4.55	-3.24
GJC2	G	Blue	Repressed with time	20	0	0.61	-0.08	-1.8	-3.36	-3.1	-3.21
GLG1	G	Blue	Repressed with time	20	0	-1.86	-0.66	-1.53	-2.27	-2.78	-3.39
IL1R1	G	Blue	Repressed with time	20	0	0.22	0.5	-2.32	-2.65	-3.05	-3.6
IL24	G	Blue	Repressed with time	20	0	0.4	-0.06	-2.59	-2.37	-2.62	-2.79
IL8	G	Blue	Repressed with time	20	0	-0.91	-0.74	-2.5	-2.75	-2.94	-3.73
ITGA1	G	Blue	Repressed with time	20	0	-0.14	-0.34	-0.77	-0.95	-1.27	-1.5
KCNJ15	G	Blue	Repressed with time	20	0	-0.83	-1.72	-2.15	-2.28	-2.21	-2.06
KSR1	G	Blue	Repressed with time	20	0	-1.76	-0.74	-1.44	-2.46	-2.85	-3.42
MAPK13	G	Blue	Repressed with time	20	0	-0.46	-0.43	-0.91	-2.56	-3.97	-2.86
PHLDA1	G	Blue	Repressed with time	20	0	-0.36	-0.35	-2.2	-3.51	-3.87	-3.84
PLK2	G	Blue	Repressed with time	20	0	-1.06	-0.19	-1.16	-1	-1.66	-1.86
PTPRA	G	Blue	Repressed with time	20	0	0.36	-0.67	-1.87	-1.65	-1.85	-2.25
PTPRK	G	Blue	Repressed with time	20	0	-0.11	0.01	-0.76	-1.53	-1.65	-1.4
RAC1	G	Blue	Repressed with time	20	0	-0.75	-0.81	-1.98	-1.69	-1.55	-1.74
RASAL1	G	Blue	Repressed with time	20	0	-0.81	-0.5	-0.98	-1.11	-1.46	-2.01
RCBTB2	G	Blue	Repressed with time	20	0	-0.92	-1.41	-1.32	-1.66	-1.45	-1.67
RHBDD2	G	Blue	Repressed with time	20	0	-0.31	-0.16	-1.54	-2.41	-2.79	-3.22
S1PR1	G	Blue	Repressed with time	20	0	-0.2	-0.49	-0.98	-1.34	-1.78	-1.71
SGPL1	G	Blue	Repressed with time	20	0	-0.18	-0.2	-1.07	-1.66	-1.69	-1.82
SLC11A1	G	Blue	Repressed with time	20	0	-0.79	-0.37	-2.66	-3.32	-3.67	-3.12
SMPDL3A	G	Blue	Repressed with time	20	0	0.37	0.32	-1.51	-1.96	-2.42	-2.19
SPC25	G	Blue	Repressed with time	20	0	0.02	-0.26	-1.87		-2.72	-2.45
TAL2	G	Blue	Repressed with time	20	0	-0.93	-0.4	-2.25	-2.19	-3.15	-2.77
THBS1	G	Blue	Repressed with time	20	0	0.47	0.52	-0.33	-3.36	-4.9	-7.1
TTK	G	Blue	Repressed with time	20	0	-0.75	-0.77	-3.15	-3.52	-3.7	-3.46
ENC1	Unassigned	Grey	Profile not significantly enriched	0	0	-0.88	-1.63	-0.63	-0.74	-0.51	-0.55
RIN1	Unassigned	Grey	Profile not significantly enriched	3	0	-0.31	-0.69	-1.66	-1.03	-0.81	-1.47
IL16	Unassigned	Grey	Profile not significantly enriched	4	0	-0.7	-1.05	-0.84	-0.66	-1.04	-0.93
LRCH4	Unassigned	Grey	Profile not significantly enriched	7	0	-1.32	-1.54	-0.9	-0.28	-1.18	-0.51
FGR	Unassigned	Grey	Profile not significantly enriched	15	0	-0.67	-0.35	-0.36	-0.08	1.06	0.51
RGS4	Unassigned	Grey	Profile not significantly enriched	15	0	-1.75	-0.12	-1.71	-1.11	-0.21	-0.18
ZFP36L1	Unassigned	Grey	Profile not significantly enriched	22	0	-0.14	-1.07	-0.57	-1.23	-1.1	-1.07
CDC27	Unassigned	Grey	Profile not significantly enriched	28	0	-0.62	0.02	-0.47	0.05	0.41	0.85
FRG1	Unassigned	Grey	Profile not significantly enriched	28	0	-0.61	-0.67	-0.77	-0.29	-0.14	0.46
GHRL	Unassigned	Grey	Profile not significantly enriched	28	0	-0.43	-0.58	-0.06	-0.11	0.99	1.8
SRM	Unassigned	Grey	Profile not significantly enriched	28	0	0.44	-0.27	-0.06	0.24	1.01	1.55
CASP4	Unassigned	Grey	Profile not significantly enriched	34	0	0.26	0.96	1.1	1.5	1.34	1.04
IFI16	Unassigned	Grey	Profile not significantly enriched	34	0	-0.31	1.49	1.24	1.68	1.6	1.25
SP110	Unassigned	Grey	Profile not significantly enriched	34	0	-0.46	1.02	1.66	1.84	1.8	1.16
IFITM1	Unassigned	Grey	Profile not significantly enriched	35	0	-0.65	-0.14	0.91	2.4	1.58	1.57
NBN	Unassigned	Grey	Profile not significantly enriched	35	0	0.16	1.28	1.66	1.98	1.76	1.53
NCBP2	Unassigned	Grey	Profile not significantly enriched	35	0	-0.18	1.35	1.24	1.22	1.31	1.34
SFTPA2	Unassigned	Grey	Profile not significantly enriched	35	0		0.6	1.16	1.5	0.86	1.68
SIVA1	Unassigned	Grey	Profile not significantly enriched	35	0	0.4	1.21	1.47	2.67		2.21
NMI	Unassigned	Grey	Profile not significantly enriched	36	0	0.14	1.13	1.53		0.91	0.93
TNF	Unassigned	Grey	Profile not significantly enriched	36	0	0.44	0.96	1.23	0.35	0.83	0.42
FOXA3	Unassigned	Grey	Profile not significantly enriched	37	0	-0.54	0.99	0.8	0.56	0.77	0.97
GSTA2	Unassigned	Grey	Profile not significantly enriched	37	0	-0.49	1.43	1.33	1.11	0.77	1.51
CXCR4	Unassigned	Grey	Profile not significantly enriched	38	0	-0.65	-1.85	-0.68	-0.87	-1.07	-2.01
MX2	Unassigned	Grey	Profile not significantly enriched	40	0	-0.02	-1.09	-0.76	-1.39	-0.89	-1.14
LPL	Unassigned	Grey	Profile not significantly enriched	42	0	-0.41	-0.38	-1.53	-1.04	-0.91	-0.5
PARP2	Unassigned	Grey	Profile not significantly enriched	42	0	-0.2	-0.34	-0.82	-0.48	-1.13	-0.83
RGS2	Unassigned	Grey	Profile not significantly enriched	52	0	-0.28	-0.34	0.53	-0.48	-0.45	0.29
PTPRC	Unassigned	Grey	Profile not significantly enriched	54	0	-0.08	0.44	1.49	0.82	1.58	1.18
CRISP3	Unassigned	Grey	Profile not significantly enriched	56	0	0.73	1.14	0.26	-0.48	-0.17	-0.38
FOS	Unassigned	Grey	Profile not significantly enriched	56	0	-1	0.47	-2.24	-2.62	-2.84	-3.36
HBEGF	Unassigned	Grey	Profile not significantly enriched	56	0	0.39	0.5	-3.09	-3.7	-3.72	-3.55
MAPK9	Unassigned	Grey	Profile not significantly enriched	56	0	3	4.67	0.41	-0.41	-0.43	0.09
VNN2	Unassigned	Grey	Profile not significantly enriched	56	0	0.26	0.54		-0.68	-1.03	-1.16
GPR183	Unassigned	Grey	Profile not significantly enriched	58	0	0.63	0.63	-0.89	0.33	-0.94	-1.87
LIPC	Unassigned	Grey	Profile not significantly enriched	63	0	0.17	1.48	0.82	1.29	0.53	1.03
NUP153	Unassigned	Grey	Profile not significantly enriched	63	0	-0.1	1.58	0.9	0.87	0.79	0.96
SULT2A1	Unassigned	Grey	Profile not significantly enriched	63	0	0.61	1.55	0.84	1.25	0.24	1.24
IL2RA	Unassigned	Grey	Profile not significantly enriched	64	0	0.16	1.83	1.31	0.77	0.52	-0.16
IL7	Unassigned	Grey	Profile not significantly enriched	64	0	0.12	3.6	2.14	2.31	2.87	2.36
LCP2	Unassigned	Grey	Profile not significantly enriched	64	0	0.97	2.73	1.41	1.2	1.54	0.84
LIMK2	Unassigned	Grey	Profile not significantly enriched	64	0	0.28	3.62	2.48	1.92	2.04	1.4
STX11	Unassigned	Grey	Profile not significantly enriched	64	0	0.91	1.74	1.42	1.98	1.34	0.72
TBX21	Unassigned	Grey	Profile not significantly enriched	64	0	0.25	2.53	2.25	1.61	1.58	0.95
TRIM21	Unassigned	Grey	Profile not significantly enriched	64	0	0.4	1.53	1.06	0.56	0.74	0.48
ADORA3	Unassigned	Grey	Profile not significantly enriched	71	0	0.27	-0.75	0.82	0.07	0.41	0.77
ATF5	Unassigned	Grey	Profile not significantly enriched	71	0	0.51	-0.1	0.67	0.72	0.55	0.9
NRN1	Unassigned	Grey	Profile not significantly enriched	76	0	0.16	0.73	2.07	1.08	1.87	0.85
RAPGEF2	Unassigned	Grey	Profile not significantly enriched	76	0	0.71	0.42	1.21	0.64	1.34	1.08
TGFB1	Unassigned	Grey	Profile not significantly enriched	76	0	1.1	0.49	1.63	1.66	1.72	1.45
KRT13	Unassigned	Grey	Profile not significantly enriched	77	0	0.68	0.8	0.39	1.28	0.38	1.12
HPRT1	Unassigned	Grey	Profile not significantly enriched	82	0	1.05	2.73	1.12	0.04	0.3	0.05
CR2	Unassigned	Grey	Profile not significantly enriched	83	0		1.2	0.37	-0.43	0.49	0.92
KLF2	Unassigned	Grey	Profile not significantly enriched	83	0	0.59	1.57	0.81		1.79	1.17
CCL13	Unassigned	Grey	Profile not significantly enriched	84	0	1.24	2.38	3.23	2.68	1.54	0.17
CCRL2	Unassigned	Grey	Profile not significantly enriched	84	0	0.44	1.19	1.54	1.45	0.82	0.36
PROCR	Unassigned	Grey	Profile not significantly enriched	84	0	0.93	0.83	1.85	1.06	0.44	-0.79
IGF2R	Unassigned	Grey	Profile not significantly enriched	87	0	1.23	0.35	2.02	1.96	1.86	0.96
PMAIP1	Unassigned	Grey	Profile not significantly enriched	88	0	1.6	1.3	0.04	-0.07	-0.02	0.12
HLX	Unassigned	Grey	Profile not significantly enriched	90	0	2.32	1.59	0.7	1.61	0.98	0.68
IRS2	Unassigned	Grey	Profile not significantly enriched	91	0	0.56	0.4	0.05	-0.2	-0.73	-0.66
EPS15	Unassigned	Grey	Profile not significantly enriched	93	0	1.25	0.93	1.93	1.35	1.41	1.42
MAT2B	Unassigned	Grey	Profile not significantly enriched	93	0	1.37	1.17	2.23	1.68	2.02	1.27
RB1	Unassigned	Grey	Profile not significantly enriched	93	0	1.38	0.91	2	1.43	1.66	1.27
ST5	Unassigned	Grey	Profile not significantly enriched	93	0	1.3	0.52	1.63	1.45	1.51	1.13
TP53I3	Unassigned	Grey	Profile not significantly enriched	93	0	1.18	1.01	1.7	0.52	0.98	1.05
DDX21	Unassigned	Grey	Profile not significantly enriched	94	0	0.95	1.65	0.47	1.57	1.89	1.56
UNG	Unassigned	Grey	Profile not significantly enriched	94	0	1.65	1.6	0.82	1.72	1.97	1.39
ARID5A	Unassigned	Grey	Profile not significantly enriched	95	0	1.61	2.11	0.49	0.62	0.63	-0.09
BACH1	Unassigned	Grey	Profile not significantly enriched	96	0	1.28	1.45	0.82	-0.32	0.26	-0.09
BST1	Unassigned	Grey	Profile not significantly enriched	96	0	2.62	3.6	2.62	1.91	1.88	1.94
CCL8	Unassigned	Grey	Profile not significantly enriched	96	0	2.64	3.11	1.59	1.25	0.99	0.58
CLIC4	Unassigned	Grey	Profile not significantly enriched	96	0	1.19	0.81	1.14	0.29	0.67	0.52
EGR2	Unassigned	Grey	Profile not significantly enriched	96	0	2.66	2.86	1.36	1.3	0.87	0.53
GADD45B	Unassigned	Grey	Profile not significantly enriched	96	0	3.18	2.96	1.93	1.35	1.44	1.44
GNG10	Unassigned	Grey	Profile not significantly enriched	96	0	0.84	1.62	1.44	0.85	1.09	0.71
KCNJ2	Unassigned	Grey	Profile not significantly enriched	96	0	1.43	1.94	1.21	0.69	0.96	0.48
PIM1	Unassigned	Grey	Profile not significantly enriched	96	0	2.72	3.19	2.34	1.66	2.2	1.96
SERPINE1	Unassigned	Grey	Profile not significantly enriched	96	0	1.3	1.45	1.17	0.75	0.79	0.82
SLC38A2	Unassigned	Grey	Profile not significantly enriched	96	0	1.78	1.91	1.49	0.56	0.88	0.2
ABCC3	Unassigned	Grey	Profile not significantly enriched	97	0	0.41	0.48	0.54	0.45	0.83	-0.41
BBC3	Unassigned	Grey	Profile not significantly enriched	97	0	2.16	1.97	1.71	1.99	2.46	1.59
CASP5	Unassigned	Grey	Profile not significantly enriched	97	0	0.95	1.47	0.96	1.1	1.2	0.7
CSF2RB	Unassigned	Grey	Profile not significantly enriched	97	0	0.66	1.76	2.18	1.88	2.07	1.14
DEK	Unassigned	Grey	Profile not significantly enriched	97	0	1.49	1.71	1.99	1.79	1.64	1.1
GLB1	Unassigned	Grey	Profile not significantly enriched	97	0	2.84	2.63	2.59	2.96	3.15	2.22
MRPL23	Unassigned	Grey	Profile not significantly enriched	97	0	1.42	1.79	2.03	2.09	2.28	1.62
NASP	Unassigned	Grey	Profile not significantly enriched	97	0	1.23	1.17	1.16	1.07	1.39	1.06
PSMA2	Unassigned	Grey	Profile not significantly enriched	97	0	1.54	1.09	2.14	2.25	2.28	1.32
PSMA4	Unassigned	Grey	Profile not significantly enriched	97	0	0.85	0.65	1.4	1.27	1.52	0.59
ANG	Unassigned	Grey	Filtered before analysis - missing values	NA	0	0.2	0.2	-0.44	-0.36	-0.44	-0.75
AP1S2	Unassigned	Grey	Filtered before analysis - missing values	NA	0	0.14	-0.4	-0.52	-0.54	-0.26	0.08
HGF	Unassigned	Grey	Filtered before analysis - missing values	NA	0	-0.04	0.58	0.38	0.22	0.4	0.25
ICAM3	Unassigned	Grey	Filtered before analysis - missing values	NA	0	-0.1	-0.26	-0.66	-0.47	-0.7	-0.56
JUP	Unassigned	Grey	Filtered before analysis - missing values	NA	0	-0.235	-0.4	-0.6	-0.36	-0.15	-0.995
NINJ2	Unassigned	Grey	Filtered before analysis - missing values	NA	0	0.105	0.19	-0.13	0.025	-0.1	-0.44
SIGLEC7	Unassigned	Grey	Filtered before analysis - missing values	NA	0	-0.04	0.16	-0.23	-0.05	0.08	-0.19
SORBS2	Unassigned	Grey	Filtered before analysis - missing values	NA	0		0.84	0.56	0.76	-0.12	0.76
UNC93B1	Unassigned	Grey	Filtered before analysis - missing values	NA	0	0.58	0.82	0.44	0.37	0.83	0.7
ZNF395	Unassigned	Grey	Filtered before analysis - missing values	NA	0	-0.135	-0.405	-0.235	-0.15	-0.225	-0.155
