# Supplementary material for: Dissecting Interferon-Induced Transcriptional Programs in Human Peripheral Blood Cells
Source: PLoS One. 2010 Mar 22;5(3):e9753. doi: 10.1371/journal.pone.0009753 (PMC2842296; doi:10.1371/journal.pone.0009753)
Supplement: Table S8 — IFNγ-induced transcripts unique to mixed-cell populations. 40 genes significantly induced by IFNγ in the heterogeneous PBMC population that were not significantly induced after IFNγ treatment in any of the purified cell subsets. The genes are ordered alphabetically using gene annotation from Source [70]. (0.02 MB XLS) [file pone.0009753.s010.xls]

## Sheet: Emergent Genes
Table S7 (Waddell et al.)
40 genes significantly induced by IFNg in PBMC that were not significantly induced in any of the purified cell subsets (after IFNg treatment)
Gene ID	Gene Function
ATF3	ATF3 activating transcription factor 3 | IMAGE:428248
B4GALT5	B4GALT5 UDP-Gal:betaGlcNAc beta 1,4- galactosyltransferase, polypeptide 5 | IMAGE:825641
BHMT	BHMT betaine-homocysteine methyltransferase | IMAGE:294140
C1QB	C1QB complement component 1, q subcomponent, beta polypeptide | IMAGE:85128
CCR5	CCR5 chemokine (C-C motif) receptor 5 | LCP:28
CD83	CD83 CD83 antigen (activated B lymphocytes, immunoglobulin superfamily) | IMAGE:685695
CD86	CD86 CD86 antigen (CD28 antigen ligand 2, B7-2 antigen) | IMAGE:50214
CDK4	CDK4 cyclin-dependent kinase 4 | IMAGE:740079
CYP27B1	CYP27B1 cytochrome P450, subfamily XXVIIB (25-hydroxyvitamin D-1-alpha-hydroxylase), polypeptide 1 | IMAGE:1761925
DAB2	DAB2 disabled (Drosophila) homolog 2 (mitogen-responsive phosphoprotein) | IMAGE:137231
EGR1	EGR1 early growth response 1 | IMAGE:376370
EMR1	EMR1 egf-like module containing, mucin-like, hormone receptor-like sequence 1 | IMAGE:66507
F3	F3 coagulation factor III (thromboplastin, tissue factor) | IMAGE:1928791
G0S2	G0S2 putative lymphocyte G0/G1 switch gene | IMAGE:1572233
GEM	GEM GTP-binding protein overexpressed in skeletal muscle | IMAGE:27899
GPR86	GPR86 G protein-coupled receptor 86 | IMAGE:66596
HOMER-2B	HOMER-2B Homer, neuronal immediate early gene, 2 | IMAGE:261967
HU-K5	HU-K5 lysophospholipase-like | IMAGE:347403
IGSF6	IGSF6 immunoglobulin superfamily, member 6 | IMAGE:2408599
INHBA	INHBA inhibin, beta A (activin A, activin AB alpha polypeptide) | IMAGE:2458975
IRF4	IRF4 interferon regulatory factor 4 | IMAGE:1671163
JAG1	JAG1 jagged 1 (Alagille syndrome) | IMAGE:141815
LYN	LYN v-yes-1 Yamaguchi sarcoma viral related oncogene homolog | IMAGE:1670800
MRPS15	MRPS15 mitochondrial ribosomal protein S15 | IMAGE:346527
NFKBIE	NFKBIE nuclear factor of kappa light polypeptide gene enhancer in B-cells inhibitor, epsilon | IMAGE:1351795
OAS1	OAS1 2',5'-oligoadenylate synthetase 1 (40-46 kD) | IMAGE:1303401
OAS3	OAS3 2'-5'-oligoadenylate synthetase 3 (100 kD) | IMAGE:2072763
PBEF	PBEF pre-B-cell colony-enhancing factor | IMAGE:487872
PDGFRA	PDGFRA platelet-derived growth factor receptor, alpha polypeptide | IMAGE:486617
RALB	RALB v-ral simian leukemia viral oncogene homolog B (ras related; GTP binding protein) | IMAGE:2472305
SCYA2	SCYA2 small inducible cytokine A2 (monocyte chemotactic protein 1, homologous to mouse Sig-je) | IMAGE:143842
SCYA3	SCYA3 small inducible cytokine A3 (homologous to mouse Mip-1a) | IMAGE:460398
SCYA4	SCYA4 small inducible cytokine A4 (homologous to mouse Mip-1b) | IMAGE:259552
SCYA7	SCYA7 small inducible cytokine A7 (monocyte chemotactic protein 3) | IMAGE:485989
SELPLG	SELPLG selectin P ligand | IMAGE:485882
SEPX1	SEPX1 selenoprotein X, 1 | IMAGE:1492463
TNFAIP6	TNFAIP6 tumor necrosis factor, alpha-induced protein 6 | IMAGE:357031
TXN	TXN thioredoxin | IMAGE:1335582
UQCR	UQCR ubiquinol-cytochrome c reductase (6.4kD) subunit | IMAGE:725364
WT1	WT1 Wilms tumor 1 | IMAGE:594782
